# Supplementary material
Source: publisher figshare collection journal article supplement (https://diabetesjournals.figshare.com/articles/dataset/_/21782726)
Supplement: Supplementary file 1 [file 2]

## Sheet: Table description
		Appendix B Table 1 contains all lipidomics data used in this manuscript.
	Sheet	Description	Related figures
	Appendix B Table 1A	Lipid species measured with high confidence in ADIPOR2 KO and WT immortalized human pre-adipocytes treated for 24 h. Treatments: normal culture condition (full medium, n=6 samples/genotype), normal culture condition with BSA (BSA, n=6 samples/genotype), normal culture condition with 100 µM PA (100 µM PA, n=6 samples/genotype), and normal culture condition with 200 µM PA (200 µM PA, n=6 samples fo…	Fig. 2A-C, Fig. S2A&C
	Appendix B Table 1B	DAG Lipid species measured with in ADIPOR2 KO and WT immortalized human pre-adipocytes treated for 24 h. Treatments: normal culture condition (full medium, n=6 samples/genotype), normal culture condition with BSA (BSA, n=6 samples/genotype), normal culture condition with 100 µM PA (100 µM PA, n=6 samples/genotype), and normal culture condition with 200 µM PA (200 µM PA, n=6 samples for WT and n=5…	Fig. S2D
	Appendix B Table 1C	Lipid species measured with high confidence in ADIPOR2 KO and WT immortalized human adipocytes treated for 24 h. Treatments: normal culture condition (full medium, n=3 samples/genotype), normal culture condition with BSA (BSA, n=6 samples/genotype), normal culture condition with 250 µM PA (250 µM PA, n=6 samples/genotype), and normal culture condition with 500 µM PA (500 µM PA, n=6 samples/genoty…	Fig. 3B-D, Fig. S3F-G
	Appendix B Table 1D	DAG Lipid species measured with in ADIPOR2 KO and WT immortalized human adipocytes treated for 24 h. Treatments: normal culture condition (full medium, n=6 samples/genotype), normal culture condition with BSA (BSA, n=6 samples/genotype), normal culture condition with 100 µM PA (100 µM PA, n=6 samples/genotype), and normal culture condition with 200 µM PA (200 µM PA, n=6 samples for WT and n=5 for…	Fig. S3H
	Appendix B Table 1E	Lipid species measured with high confidence in ADIPOR2 KO and WT mouse adipocytes treated for 24 h. Treatments: normal culture condition with BSA (CTRL, n=4 WT mice, n=5 KO mice), normal culture condition with 250 µM PA (PA250, n=5 mice/genotype), and normal culture condition with 500 µM PA (PA500, n=4 WT mice, n=5 KO mice). Data is normalized to the internal standard and expressed as µg/million …	Fig. 4D-E, Fig. S4F-H
	Appendix B Table 1F	Lipid species measured with high confidence in wildtype and ADIPOR2 KO, chow-fed, 6-month-old male mouse scWAT and eWAT (n=8 wildtype and 8 ADIPOR2 KO). Data is normalized to the internal standard and expressed as µg/mg adipose tissue.	Fig. 5C-F, Fig. S5A-D
	Appendix B Table 1G	Lipid species measured with high confidence in wildtype and ADIPOR2 KO, HFD-fed for 4 months, 6-months old at termination male mouse scWAT and eWAT (n=7 wildtype and 7 ADIPOR2 KO). Data is normalized to the internal standard and expressed as µg/mg adipose tissue.	Fig. 7C-E, Fig. S7C-G
	Appendix B Table 1H	Lipid species measured with high confidence in ADIPOR2 KO and WT immortalized human adipocytes treated for 24 h. Treatments: normal culture condition with BSA (BSA, n=3 samples/genotype/repeat), normal culture condition with 6 µg/ml of recombinant adiponectin (Adipoq, n=3 samples/genotype/repeat). Data is normalized to the internal standard and then to total PCs or PEs for respective species, exp…	Fig. S5A
	Appendix B Table 1I	Lipid species measured with high confidence in ADIPOR2 KO and WT immortalized human adipocytes treated for 24 h. Treatments: normal culture condition with DMSO (DMSO, n=2 samples/repeat), normal culture condition with 1 µM SCD inhibitor (DMSO + SCDi, n=2 samples/repeat), normal culture condition with 600 µM PA (600PA, n=2 samples/repeat), and normal culture condition with 600 µM PA plus 1 µM SCD …	Fig. S5D
	Appendix B Table 1J	Lipid species measured with high confidence in wildtype and ADIPOR2 KO, chow-fed: 6-month-old male mouse scWAT and eWAT (n=8 wildtype and 8 ADIPOR2 KO), HFD-fed for 4 months, 6-months old at termination male mouse scWAT and eWAT (n=7 wildtype and 7 ADIPOR2 KO). Data is normalized to the internal standard and then normalized to total phospholipids and expressed as Mol% of total phospholipids.	Fig. S7B

## Sheet: Appendix B, Table 1A
#	Name	Sample Text	ID	Celltype	Run	Treatment	Genotype	16:0 20:3 PI	16:0 20:4 PI	16:0 20:5 PI	16:0 18:0 PI	16:0 18:1 PI	16:0 18:2 PI	16:0 18:3 PI	16:0 16:0 PI	18:0 22:4 PI	18:0 22:5 PI	18:0 22:6 PI	16:0 22:4 PI	16:0 16:1 PI	16:0 22:5 PI	16:0 22:6 PI	16:0 20:3 PC	16:0 20:4 PC	16:0 20:5 PC	16:0 18:0 PC	16:0 18:1 PC	16:0 18:2 PC	16:0 18:3 PC	16:0 16:0 PC	16:0 22:4 PC	16:0 22:5 PC	16:0 22:6 PC	16:0 20:0 PC	16:0 20:1 PC	18:0 22:1 PC	18:0 22:2 PC	18:0 22:6 PC	16:0 22:0 PC	18:0 22:3 PC	18:1 22:6 PC	16:0 18:2 PG	16:0 20:3 PG	16:0 20:0 PG	16:0 20:5 PG	16:0 18:0 PG	16:0 16:0 PG	16:0 22:4 PG	16:0 22:5 PG
16	AdipoR2_phospholipids_211026rn_016	S16	pread1_r2_100pa1	Pre-adipocyte	1	100µM PA	knockout	0.244033	0.548237	0.0086538	1.15016	1.27116	0.150624	0.0316484	1.74063	0.0746018	0.0904353	0.0614109	0.017922	0.0114895	0.0475093	0.0120033	0.208608	0.389412	0.110851	2.55983	4.8674	0.679183	0.0865416	34.0388	0.0909505	0.234071	0.310593	0.0421444	0.285507	0.0745832	0.186653	0.135333	0.0216996	0.015271	0.278281	0.0022722	0.00199946	0.00641267	0.000619513	0.00290985	0.663606	0.000279106	0.000726735
17	AdipoR2_phospholipids_211026rn_017	S17	pread1_r2_100pa2	Pre-adipocyte	1	100µM PA	knockout	0.226897	0.52771	0.013379	0.961919	1.30994	0.147434	0.0285222	1.4799	0.0548343	0.105366	0.066367	0.0206579	0.0324303	0.0420238	0.0226847	0.205774	0.382088	0.108817	2.41953	4.83594	0.666653	0.0657946	32.0163	0.0799672	0.22439	0.318695	0.048159	0.279858	0.0832055	0.184024	0.132344	0.0256551	0.0149048	0.275878	0.00262855	0.00142461	0.00681011	0.000339483	0.00460237	0.650434	0.000549454	0.000388931
18	AdipoR2_phospholipids_211026rn_018	S18	pread1_r2_100pa2	Pre-adipocyte	1	100µM PA	knockout	0.243116	0.516857	0.0112213	1.05232	1.28938	0.184489	0.0317328	1.59739	0.0677862	0.104444	0.0740867	0.0142234	0.023981	0.0427266	0.0200164	0.197494	0.378217	0.101899	2.33033	4.78284	0.666967	0.0846727	31.4736	0.0747047	0.220856	0.292855	0.0408968	0.281387	0.0636748	0.165439	0.128895	0.0201579	0.0105967	0.26876	0.00210688	0.00222803	0.00607986	0.000811702	0.00748647	0.611628	0.000419103	0.000503788
58	AdipoR2_phospholipids_211026rn_058	S58	pread2_r2_100pa1	Pre-adipocyte	2	100µM PA	knockout	0.245516	0.536758	0.0135514	1.0026	1.30361	0.145185	0.0274586	1.92529	0.0463776	0.0820114	0.0578777	0.0288405	0	0.0571158	0.02636	0.161223	0.324564	0.0889499	2.11674	3.88145	0.545	0.0632273	34.4536	0.0702367	0.181584	0.253524	0.036959	0.217861	0.0550678	0.158185	0.0929012	0.0197361	0.00607887	0.197947	0	0.00101276	0.00513272	0	0.00228273	0.594192	0.000351054	0.000643316
59	AdipoR2_phospholipids_211026rn_059	S59	pread2_r2_100pa2	Pre-adipocyte	2	100µM PA	knockout	0.213954	0.581457	0.0132577	0.859571	1.32455	0.14936	0.0281311	1.88457	0.0491785	0.102054	0.0519233	0.0157955	0.0191664	0.0431724	0.0163464	0.146548	0.255248	0.0774904	1.80534	3.3522	0.444406	0.0508639	31.0961	0.0461851	0.145328	0.192702	0.0284328	0.158413	0.0410927	0.150086	0.0643818	0.0117606	0.00572873	0.146141	0.00156354	0.00149652	0.00577346	0.00050505	0.00407979	0.707161	0.000489842	0.000852241
60	AdipoR2_phospholipids_211026rn_060	S60	pread2_r2_100pa3	Pre-adipocyte	2	100µM PA	knockout	0.247036	0.611414	0.0117315	0.896381	1.44031	0.158848	0.0240935	2.08319	0.0601441	0.0924065	0.0469609	0.026062	0.0096938	0.0657448	0.028745	0.171708	0.328562	0.0895104	2.03909	3.50328	0.527315	0.0659088	33.1086	0.0471002	0.192404	0.251876	0.0333415	0.20172	0.0552546	0.167515	0.0936311	0.014126	0.00879558	0.166661	0.00143463	0.00209722	0.00556259	0.000106128	0.00217792	0.748828	0.000317097	0.000561746
22	AdipoR2_phospholipids_211026rn_022	S22	pread1_r2_200pa1	Pre-adipocyte	1	200µM PA	knockout	0.238884	0.734613	0.013273	1.46848	1.17565	0.122062	0.0354864	4.57414	0.0708078	0.0935381	0.040838	0.0371232	0.027629	0.0834036	0.0305235	0.252966	0.539799	0.162609	2.64492	3.60859	0.504574	0.0557729	53.745	0.10492	0.365745	0.400747	0.0359477	0.191031	0.0450223	0.162847	0.142385	0.0124869	0.010673	0.204616	0.00135918	0.00102229	0.00323487	0.000626402	0	2.61941	0.000561168	0.00137346
23	AdipoR2_phospholipids_211026rn_023	S23	pread1_r2_200pa2	Pre-adipocyte	1	200µM PA	knockout	0.25832	0.808113	0.0287998	1.4797	1.33664	0.130842	0.0180962	4.56567	0.06373	0.100289	0.0601382	0.0216059	0.0174839	0.0617273	0.0451531	0.279896	0.60085	0.136865	2.78371	3.4302	0.495256	0.0662016	44.9027	0.118594	0.320518	0.45265	0.0394153	0.191022	0.0494205	0.156809	0.159715	0.0102361	0.0123572	0.216313	0.000779308	0.0013811	0.00701226	0.000496847	0	2.81114	0.000504911	0.000973451
24	AdipoR2_phospholipids_211026rn_024	S24	pread1_r2_200pa3	Pre-adipocyte	1	200µM PA	knockout	0.210942	0.721398	0.0252256	1.38482	1.06387	0.119951	0.0202452	4.20528	0.0617925	0.086144	0.0468223	0.026264	0.0193844	0.0757444	0.0265404	0.239912	0.498783	0.154508	2.47929	3.22288	0.48904	0.070953	51.6496	0.0994547	0.28475	0.380715	0.0368987	0.186786	0.0464656	0.156603	0.130693	0.0125782	0.010718	0.185732	0.00150155	0.00134699	0.00564597	0.000765843	0.0033431	2.55795	0.000264717	0.000562296
64	AdipoR2_phospholipids_211026rn_064	S64	pread2_r2_200pa1	Pre-adipocyte	2	200µM PA	knockout	0.199967	0.704942	0.0173117	1.2697	1.09479	0.12273	0.013226	4.32966	0.0428962	0.0586262	0.0468235	0.0317591	0.024851	0.0668533	0.0378742	0.211204	0.406644	0.119535	2.2894	2.73637	0.417885	0.045268	45.4812	0.0787126	0.242826	0.292686	0.0183934	0.15184	0.0393849	0.143023	0.0981324	0.0066469	0.0052995	0.121944	0.000761982	0.00146341	0.00395167	0.000390868	0	2.01591	0.000157838	0.00130325
65	AdipoR2_phospholipids_211026rn_065	S65	pread2_r2_200pa2	Pre-adipocyte	2	200µM PA	knockout	0.22034	0.690102	0.0153422	1.11255	1.01489	0.116188	0.00812175	4.45982	0.0410288	0.0817204	0.056655	0.0265079	0.00860236	0.0565207	0.0406696	0.224391	0.444861	0.12084	2.16074	2.58018	0.406565	0.0560513	48.1652	0.0782499	0.24986	0.307569	0.0298065	0.159739	0.0348574	0.139302	0.106235	0.00967717	0.00794265	0.139794	0.000581364	0.00152973	0.00473548	0.000444011	0.00338858	2.07061	0.000382306	0.000759819
10	AdipoR2_phospholipids_211026rn_010	S10	pread1_r2_bsa1	Pre-adipocyte	1	BSA	knockout	0.0458118	0.112223	0.00198717	0.486048	0.272213	0.015609	0.00112112	0.031893	0.0537015	0.0936674	0.055665	0.00495858	0.0170316	0.00819043	0.000866749	0.175074	0.23664	0.0798169	1.71307	3.46981	0.501255	0.0638628	7.17115	0.0752002	0.200338	0.276873	0.0473393	0.30882	0.0605202	0.160291	0.16586	0.0137146	0.0107406	0.40185	0.00289887	0.00245538	0.00823753	0.00114854	0.005274	0.0419577	0.000874058	0.000885433
11	AdipoR2_phospholipids_211026rn_011	S11	pread1_r2_bsa2	Pre-adipocyte	1	BSA	knockout	0.051539	0.102338	0	0.475212	0.271125	0.0204238	2.56961e-05	0.0259367	0.0606687	0.0944517	0.0413072	0.0061673	0.015565	0.0075153	0.00163683	0.178467	0.249626	0.0762502	1.80836	3.57252	0.555507	0.0479831	7.4428	0.0922093	0.235255	0.297565	0.0485554	0.311103	0.0539562	0.155207	0.177055	0.0132226	0.0119254	0.424478	0.00285457	0	0.00783925	0.00116035	0.00525485	0.0485408	0.000450252	0.000774912
12	AdipoR2_phospholipids_211026rn_012	S12	pread1_r2_bsa2	Pre-adipocyte	1	BSA	knockout	0.0523606	0.0980764	0.00101282	0.483419	0.26083	0.0153111	0.00212116	0.0414431	0.0453819	0.0800952	0.0506585	0.00355679	0.0175703	0.00786602	0.00638675	0.150269	0.182298	0.0414558	1.48552	3.2479	0.487888	0.0518763	6.486	0.0683047	0.174375	0.209879	0.0419112	0.260032	0.0577462	0.148495	0.10695	0.0108149	0.0132227	0.27278	0.00193884	0.00193843	0.010814	0.00092197	0.00561568	0.0460275	0.000615702	0
52	AdipoR2_phospholipids_211026rn_052	S52	pread2_r2_bsa1	Pre-adipocyte	2	BSA	knockout	0.0424242	0.0808782	0	0.270311	0.21561	0.0204974	0.000922388	0.0209665	0.0422491	0.0621295	0.0401416	0.00579871	0.0190332	0.0143053	0.00314838	0.169316	0.20604	0.0712778	1.40478	2.67896	0.466409	0.0338389	6.59328	0.0799962	0.160667	0.194661	0.0386666	0.263781	0.0636931	0.161289	0.115734	0.00776472	0.00849142	0.294197	0.00159404	0	0.00868624	0.0014556	0.00317848	0.0266072	0.000337067	0.00060189
53	AdipoR2_phospholipids_211026rn_053	S53	pread2_r2_bsa2	Pre-adipocyte	2	BSA	knockout	0.0496289	0.100591	0.00169724	0.19803	0.233077	0.0170146	6.20449e-05	0.0274444	0.0418843	0.0549111	0.0458361	0.00432349	0.0129616	0.0113749	0.00730272	0.159007	0.180145	0.0653853	1.45405	2.66102	0.472416	0.0553105	6.2816	0.0616731	0.165335	0.189091	0.033626	0.26315	0.0675621	0.157761	0.121742	0.00885425	0.0057687	0.295745	0.00182763	0.00249972	0.00994873	0.000424392	0.00338585	0.0276811	0.000348049	0.000932024
54	AdipoR2_phospholipids_211026rn_054	S54	pread2_r2_bsa3	Pre-adipocyte	2	BSA	knockout	0.0428599	0.112628	0.000507963	0.145544	0.2107	0.0229245	0.00137114	0.0224292	0.0429443	0.083129	0.0512221	0.00506899	0.0126965	0.0110648	0.00525666	0.152377	0.198059	0.0619148	1.40976	2.5956	0.451935	0.0421543	6.40858	0.0559479	0.157195	0.199393	0.0321342	0.262879	0.059757	0.168997	0.113596	0.0122727	0.00663626	0.293211	0.00172689	0.00205833	0.00695288	0.000595542	0.0026093	0.0267175	0	0.00119327
4	AdipoR2_phospholipids_211026rn_004	S4	pread1_r2_full1	Pre-adipocyte	1	Full Medium	knockout	0.0331127	0.10206	0.000365363	0.471422	0.293831	0.0248233	1.46763e-05	0.0326297	0.0569951	0.126168	0.0708749	0.00236224	0.0271686	0.00832682	0.00660968	0.180983	0.237698	0.0652432	1.80324	3.44596	0.547253	0.0661372	7.36069	0.0796142	0.21247	0.291793	0.0460955	0.311213	0.0553579	0.145017	0.164623	0.00949668	0.013168	0.381032	0.00292028	0.00256695	0.00818876	0.00078346	0.00483809	0.0482524	0.000432435	0.0009019
5	AdipoR2_phospholipids_211026rn_005	S5	pread1_r2_full2	Pre-adipocyte	1	Full Medium	knockout	0.0437258	0.130706	0.00459355	0.438992	0.276258	0.0272816	0	0.0283504	0.0682346	0.0988212	0.0805396	0.0045946	0.0326981	0.0198865	0.000862124	0.185268	0.252303	0.080179	1.91475	3.55701	0.513465	0.0698474	7.73956	0.08079	0.205691	0.293094	0.0533946	0.329142	0.0541531	0.160997	0.168657	0.0112558	0.008734	0.389134	0.0026544	0.00218807	0.00848459	0.000771222	0.00378161	0.0508598	0.000591268	0.00152679
6	AdipoR2_phospholipids_211026rn_006	S6	pread1_r2_full2	Pre-adipocyte	1	Full Medium	knockout	0.0533706	0.120241	0.000820061	0.451312	0.291338	0.0306454	0.00166026	0.0356096	0.0457238	0.0772322	0.0618925	0.007868	0.0265575	0.0119228	0.00711068	0.177288	0.224461	0.0758963	1.75906	3.45055	0.513601	0.0624768	7.19697	0.0825186	0.196372	0.276178	0.0507378	0.293311	0.0595509	0.141952	0.167026	0.00901334	0.0103104	0.383467	0.0023703	0.00284392	0.00832818	0.000325479	0.0033352	0.0508293	0.00100747	0.000689654
46	AdipoR2_phospholipids_211026rn_046	S46	pread2_r2_full1	Pre-adipocyte	2	Full Medium	knockout	0.0645548	0.113467	0.00137223	0.295494	0.238402	0.0244709	0.00282978	0.0292355	0.0582941	0.0825717	0.0508371	0.00406773	0.0215794	0.00928033	0.00614321	0.167654	0.216711	0.0848336	1.71286	3.00248	0.502909	0.0647318	7.34855	0.0713152	0.165333	0.230986	0.035886	0.327316	0.0747577	0.200463	0.140744	0.011008	0.00555901	0.301049	0.00208227	0.00184046	0.0077932	0.000560336	0.004575	0.0319348	0.000489857	0.000922476
47	AdipoR2_phospholipids_211026rn_047	S47	pread2_r2_full2	Pre-adipocyte	2	Full Medium	knockout	0.0502374	0.0923542	0.00173636	0.252279	0.266872	0.0136219	0.000585253	0.0199552	0.0501388	0.0925121	0.0664601	0.00473505	0.0138162	0.0114702	0.0053189	0.187262	0.226852	0.0758418	1.79544	3.21799	0.521062	0.0581637	7.5862	0.0790551	0.189862	0.214534	0.0456337	0.321745	0.0745387	0.220175	0.140126	0.0124766	0.00832115	0.321306	0.00191962	0	0.0105977	0.00100059	0.00219945	0.0301928	0.000441816	0.000915355
48	AdipoR2_phospholipids_211026rn_048	S48	pread2_r2_full3	Pre-adipocyte	2	Full Medium	knockout	0.0531365	0.109424	0.000698301	0.223817	0.251841	0.0227615	0.000828699	0.0324847	0.056637	0.0852752	0.0404333	0.00236003	0.00980999	0.00892125	0.00296665	0.136041	0.155669	0.0525506	1.43741	2.63963	0.435813	0.042964	6.22277	0.0588091	0.133925	0.152801	0.0337005	0.255156	0.0623493	0.172727	0.0937779	0.00675681	0.00738076	0.177548	0	0.00154849	0.00899585	0.00122511	0.00270998	0.031718	0.000582661	0.000919528
13	AdipoR2_phospholipids_211026rn_013	S13	pread1_wt_100pa1	Pre-adipocyte	1	100µM PA	wildtype	0.18786	0.462451	0.00716276	0.49694	0.865839	0.0914011	0.0179033	0.846415	0.0611915	0.105589	0.0406114	0.0237825	0.0495093	0.023534	0.0170622	0.160977	0.293649	0.0612404	1.04979	5.2138	0.47212	0.04452	7.94199	0.0500775	0.135652	0.174833	0.0188003	0.106826	0.0538615	0.168237	0.0894863	0.0185176	0.0124516	0.126235	0.00268882	0.00182778	0.00656113	0.000631377	0.00542855	0.0758361	0.000404588	0.000723051
14	AdipoR2_phospholipids_211026rn_014	S14	pread1_wt_100pa2	Pre-adipocyte	1	100µM PA	wildtype	0.179757	0.440321	0.00277555	0.711216	0.734655	0.0874569	0.0187906	0.724568	0.0690081	0.0864163	0.0555818	0.0152739	0.0496476	0.0283607	0.0153365	0.155499	0.308101	0.0710904	1.12304	5.59092	0.526676	0.0485134	8.07625	0.0523653	0.139542	0.181865	0.0204089	0.125565	0.0613657	0.191416	0.0961205	0.0156599	0.008408	0.143931	0.00196503	0.00174819	0.00577169	0.000578379	0.0081301	0.0750978	0.000422285	0.0010593
15	AdipoR2_phospholipids_211026rn_015	S15	pread1_wt_100pa2	Pre-adipocyte	1	100µM PA	wildtype	0.16762	0.410327	0.00657785	0.515034	0.858982	0.0977282	0.0108639	0.79518	0.0604787	0.0955438	0.0534831	0.0145566	0.0316849	0.0266371	0.0100072	0.165063	0.266475	0.0488365	1.10328	5.43186	0.479794	0.0474911	8.15858	0.0490357	0.123727	0.152281	0.0214874	0.116647	0.0600085	0.175166	0.0836485	0.0184763	0.0108132	0.112216	0.0024909	0.00101418	0.0061546	0.000817932	0.00656541	0.0625002	0.00089523	0.00109284
55	AdipoR2_phospholipids_211026rn_055	S55	pread2_wt_100pa1	Pre-adipocyte	2	100µM PA	wildtype	0.179538	0.506609	0.00518754	0.462453	0.89841	0.117562	0.0156099	0.936429	0.0439058	0.0656229	0.0379018	0.0146127	0.0334454	0.0321195	0.0156807	0.167432	0.290777	0.0706448	0.993588	4.22263	0.463596	0.0487854	9.30871	0.0434831	0.122244	0.159711	0.0165736	0.11361	0.0542142	0.157569	0.070765	0.011091	0.00917275	0.113132	0.00196273	0.00199663	0.00679118	0.000340897	0.00520604	0.0515309	0.000567973	0.00064366
56	AdipoR2_phospholipids_211026rn_056	S56	pread2_wt_100pa2	Pre-adipocyte	2	100µM PA	wildtype	0.196949	0.474644	0.0101026	0.559245	0.828806	0.107122	0.0087201	0.882648	0.0585603	0.0895779	0.043985	0.0218417	0.0347473	0.0353082	0.0243895	0.172591	0.313695	0.0835196	1.08237	4.50878	0.489254	0.0467907	9.85531	0.0499782	0.148434	0.196275	0.0192236	0.129835	0.0587882	0.190577	0.0832371	0.0182742	0.00889467	0.144341	0.00227905	0.00184585	0.00763096	0.00120801	0.00455842	0.0661699	0.000358798	0.000756641
57	AdipoR2_phospholipids_211026rn_057	S57	pread2_wt_100pa3	Pre-adipocyte	2	100µM PA	wildtype	0.221054	0.539392	0.00752135	0.628001	0.900174	0.107306	0.0155798	1.02328	0.0543759	0.0936354	0.0602169	0.0236361	0.018946	0.0379993	0.0242276	0.151688	0.283453	0.0631882	1.00402	4.18198	0.444439	0.0534354	9.39704	0.0447353	0.127884	0.154509	0.0136851	0.100357	0.0538804	0.169165	0.0679251	0.014975	0.00541608	0.117232	0.00180675	0.00231594	0.00661083	0.000207737	0.00583719	0.0567946	0	0.000748517
19	AdipoR2_phospholipids_211026rn_019	S19	pread1_wt_200pa1	Pre-adipocyte	1	200µM PA	wildtype	0.228388	0.848832	0.0163122	1.53379	0.974846	0.102509	0.0195061	4.38415	0.0756547	0.117786	0.0681296	0.025492	0.0367963	0.0748142	0.0456472	0.264063	0.589963	0.118211	1.46038	3.60652	0.438723	0.0580725	19.7938	0.0824725	0.240998	0.342101	0.0246903	0.107402	0.0367678	0.152303	0.129236	0.0115394	0.0123727	0.104921	0.00204905	0.00153896	0.00664111	0.000277941	0.00444254	0.792227	0.00103575	0.000880663
20	AdipoR2_phospholipids_211026rn_020	S20	pread1_wt_200pa2	Pre-adipocyte	1	200µM PA	wildtype	0.230054	0.826872	0.0205813	1.68785	1.07581	0.0923345	0.00983621	4.2015	0.066381	0.112882	0.0902385	0.0383917	0.036273	0.0520205	0.0485707	0.242353	0.566426	0.123154	1.47327	3.58942	0.436524	0.0548546	20.4809	0.0823503	0.24945	0.336725	0.0192432	0.0961653	0.0421556	0.14332	0.124977	0.00767354	0.0137201	0.110301	0.00170522	0.00165683	0.00499015	9.17173e-05	0.00421239	0.836416	0.00060518	0.000352687
21	AdipoR2_phospholipids_211026rn_021	S21	pread1_wt_200pa2	Pre-adipocyte	1	200µM PA	wildtype	0.216032	0.829775	0.0172918	1.71973	1.01449	0.0760192	0.0124076	4.53872	0.062804	0.111961	0.0703297	0.0255286	0.0434198	0.0817225	0.0475139	0.242664	0.579444	0.120853	1.50411	3.65891	0.420689	0.0491543	20.4845	0.0697851	0.225287	0.292515	0.0194177	0.0844622	0.040865	0.149046	0.126789	0.00819943	0.0121263	0.104472	0.00116134	0.000794949	0.00546636	0.000841196	0.00430144	0.778283	0.000514597	0.000978557
61	AdipoR2_phospholipids_211026rn_061	S61	pread2_wt_200pa1	Pre-adipocyte	2	200µM PA	wildtype	0.181627	0.780201	0.0136368	1.51435	1.08527	0.108196	0.0162966	4.45908	0.0408283	0.0978121	0.0452447	0.0285625	0.0107863	0.0527157	0.0279835	0.207209	0.413678	0.0928085	1.37557	3.06921	0.397873	0.0354587	21.0803	0.0621923	0.193908	0.234917	0.0150656	0.0994556	0.0427359	0.125272	0.0848891	0.00993395	0.00644084	0.0747516	0.00228579	0	0.00518268	0.000622756	0.00282331	0.677333	0.00104978	0
62	AdipoR2_phospholipids_211026rn_062	S62	pread2_wt_200pa2	Pre-adipocyte	2	200µM PA	wildtype	0.236379	0.877157	0.0197934	1.53034	1.2066	0.108717	0.0303354	4.54312	0.0677538	0.0947747	0.0637136	0.027811	0.0459612	0.0592747	0.0485303	0.22426	0.468631	0.102641	1.48791	3.24364	0.41292	0.0394975	22.7901	0.0768971	0.199227	0.266515	0.0231661	0.106284	0.0435807	0.151052	0.0762186	0.00989947	0.00950668	0.090588	0.00136197	0.000754745	0.00542336	0.000438728	0.00260085	0.701502	0.000146258	0.000859719
63	AdipoR2_phospholipids_211026rn_063	S63	pread2_wt_200pa3	Pre-adipocyte	2	200µM PA	wildtype	0.227409	0.762618	0.0145491	1.30441	1.05873	0.0994785	0.0230023	3.82206	0.0600237	0.0891123	0.0508545	0.0382086	0.0252646	0.0796563	0.0325184	0.197472	0.432817	0.0991819	1.28207	3.06648	0.391533	0.0447164	21.2892	0.0672946	0.182183	0.251665	0.0186328	0.0936902	0.0366604	0.134933	0.0866315	0.00833782	0.00396927	0.0848126	0.00184176	0.00197548	0.00486089	0.000424816	0.00326028	0.664365	0.000281778	0.000640565
7	AdipoR2_phospholipids_211026rn_007	S7	pread1_wt_bsa1	Pre-adipocyte	1	BSA	wildtype	0.0396825	0.101113	0.00133413	0.41871	0.25363	0.0204261	0.000295489	0.0330633	0.0585014	0.10789	0.0651758	0.00284449	0.0280436	0.015031	0.00457764	0.155044	0.24268	0.067998	1.1007	3.39404	0.428831	0.040465	3.44335	0.0605509	0.16098	0.21563	0.0335121	0.185347	0.0515049	0.137336	0.163737	0.00920441	0.00840373	0.31283	0.00176977	0.00229359	0.00965477	0.00138424	0.00411698	0.0481788	0.000596863	0.000793832
8	AdipoR2_phospholipids_211026rn_008	S8	pread1_wt_bsa2	Pre-adipocyte	1	BSA	wildtype	0.0451637	0.112713	0.00122406	0.465798	0.252412	0.02256	4.83281e-05	0.0315249	0.0508024	0.0846398	0.0547651	0.00282518	0.027577	0.0101252	0.00557705	0.148516	0.237468	0.064844	1.16914	3.56941	0.416294	0.0454878	3.80086	0.0662183	0.152004	0.211807	0.0342471	0.204902	0.0587464	0.155936	0.138918	0.00975742	0.00996988	0.313752	0.0020657	0.00253993	0.0073536	0.00116166	0.00531018	0.0454866	0.000825329	0.00116713
9	AdipoR2_phospholipids_211026rn_009	S9	pread1_wt_bsa2	Pre-adipocyte	1	BSA	wildtype	0.0372765	0.112458	0.000213563	0.425454	0.298596	0.023429	0.00265673	0.0443838	0.0515933	0.106574	0.0591448	0.00244586	0.0307424	0.0129357	0.0045198	0.155404	0.242232	0.0712667	1.12478	3.44473	0.430493	0.038538	3.66272	0.0609942	0.170664	0.222825	0.0304246	0.203688	0.0575258	0.153682	0.173285	0.014372	0.0106047	0.320262	0.00311479	0.00258361	0.00986545	0.00127767	0.00471493	0.0406118	0.000262207	0.000711913
49	AdipoR2_phospholipids_211026rn_049	S49	pread2_wt_bsa1	Pre-adipocyte	2	BSA	wildtype	0.0601493	0.130856	0.000187484	0.166169	0.232944	0.0119569	0.00085212	0.0240037	0.0494457	0.0992153	0.0458031	0.0048535	0.0191454	0.0109506	0.00616568	0.151235	0.201195	0.0584131	1.09869	3.00648	0.408768	0.0449383	3.92425	0.0495283	0.14034	0.162489	0.0183323	0.213875	0.0672086	0.17529	0.122063	0.00855684	0.00672457	0.243782	0.00164956	0.00257789	0.00634948	0.000845231	0.00286037	0.0249465	0.000284575	0.000966406
50	AdipoR2_phospholipids_211026rn_050	S50	pread2_wt_bsa2	Pre-adipocyte	2	BSA	wildtype	0.0580608	0.109382	0.000246715	0.297775	0.265275	0.0170408	4.77164e-05	0.0285074	0.0585165	0.0831163	0.044049	0.00355894	0.0259789	0.00926789	0.00736298	0.158382	0.215209	0.0613919	1.1343	3.15327	0.442414	0.0457018	4.18681	0.0608145	0.151036	0.198478	0.0308376	0.240799	0.0704263	0.177181	0.138801	0.00981395	0.00601785	0.272086	0.00183584	0.00197694	0.00806292	0.00119291	0.00324628	0.029868	0.000574264	0.0010261
51	AdipoR2_phospholipids_211026rn_051	S51	pread2_wt_bsa3	Pre-adipocyte	2	BSA	wildtype	0.0520918	0.131859	0.00137315	0.29577	0.254248	0.013509	0.000870505	0.0276752	0.0435616	0.0900602	0.0440868	0.00667515	0.0196943	0.0118802	0.00964784	0.154213	0.203661	0.0797492	1.10575	2.965	0.439263	0.0459895	3.95465	0.0545752	0.135586	0.170145	0.0135102	0.225812	0.064541	0.166758	0.121982	0.00892643	0.00612044	0.269263	0.00153742	0.00163327	0.00931272	0.00120195	0.00279817	0.0312827	0.000473492	0.000688434
1	AdipoR2_phospholipids_211026rn_001	S1	pread1_wt_full1	Pre-adipocyte	1	Full Medium	wildtype	0.0414595	0.121554	7.81355e-05	0.484813	0.285204	0.0182846	0	0.0328213	0.0930346	0.144698	0.0669894	0.00118946	0.0330738	0.00982622	0.00886131	0.153557	0.256578	0.0650145	1.24732	3.51967	0.418028	0.0563332	3.54472	0.0655411	0.170367	0.222224	0.0364172	0.228842	0.0508678	0.148028	0.172878	0.00906862	0.00576709	0.273596	0.00355482	0	0.0096571	0.00145815	0.00249022	0.0460704	0.00110083	0.00113177
2	AdipoR2_phospholipids_211026rn_002	S2	pread1_wt_full2	Pre-adipocyte	1	Full Medium	wildtype	0.0641042	0.129964	0.00504152	0.643895	0.296484	0.0273503	2.71322e-05	0.0216346	0.0765816	0.124334	0.0528919	0.00666189	0.0415268	0.0138807	0.00155052	0.148121	0.248144	0.0688887	1.23663	3.62592	0.44411	0.0453774	3.59545	0.0654722	0.167706	0.209993	0.0346286	0.204489	0.0377819	0.115091	0.146086	0.0081314	0.00968366	0.275805	0.00566601	0.00253336	0.0105351	0.000713514	0.00525947	0.0523355	0.000794724	0.000991095
3	AdipoR2_phospholipids_211026rn_003	S3	pread1_wt_full2	Pre-adipocyte	1	Full Medium	wildtype	0.0475091	0.124934	0.00148508	0.659059	0.321235	0.0180744	0	0.0352579	0.0755101	0.108131	0.0886298	0.00297989	0.0333308	0.0166424	0.00827897	0.140323	0.223296	0.0527156	1.16081	3.42321	0.403425	0.0704435	3.41715	0.0601696	0.150117	0.198562	0.0314711	0.181013	0.0473534	0.118065	0.146574	0.0110211	0.00858557	0.252775	0.0045883	0.00296302	0.00910514	0.00123658	0.00502001	0.0395705	0.000719934	0.000850728
43	AdipoR2_phospholipids_211026rn_043	S43	pread2_wt_full1	Pre-adipocyte	2	Full Medium	wildtype	0.0502054	0.110361	0.00112553	0.183787	0.268839	0.0170871	0.000284757	0.0280076	0.0627705	0.0891319	0.0513695	0.00670406	0.020045	0.0142228	0.00427928	0.156023	0.233507	0.0734866	1.24722	3.38694	0.450967	0.0479515	4.1082	0.0683377	0.14091	0.198786	0.0304457	0.236821	0.0720958	0.203401	0.144149	0.0119764	0.00957011	0.274497	0.00232841	0.00263434	0.00811731	0.000860306	0.00223893	0.0315022	0.000524893	0.000551574
44	AdipoR2_phospholipids_211026rn_044	S44	pread2_wt_full2	Pre-adipocyte	2	Full Medium	wildtype	0.0491658	0.11418	0.000369719	0.267733	0.253833	0.0174483	0.000742559	0.0247994	0.056944	0.0985622	0.041568	0.00546901	0.0129057	0.00981352	0.00203502	0.147994	0.221806	0.0710307	1.23672	3.34114	0.426349	0.0499766	4.15972	0.0560892	0.156355	0.180912	0.0422579	0.24238	0.0715794	0.187665	0.126733	0.0128256	0.00745312	0.250623	0.00289804	0.00221959	0.00884139	0.000645819	0.0025018	0.0217928	0.000853874	0.00117081
45	AdipoR2_phospholipids_211026rn_045	S45	pread2_wt_full3	Pre-adipocyte	2	Full Medium	wildtype	0.0560457	0.106687	0.000611234	0.220418	0.224988	0.0142374	0.000915558	0.0371444	0.0400269	0.0993149	0.0588156	0.00762921	0.0175652	0.00982437	0.00881414	0.163997	0.243634	0.06473	1.22846	3.23009	0.396338	0.0496794	4.01825	0.0614644	0.163206	0.175248	0.0332046	0.238162	0.0704079	0.193413	0.14605	0.0111749	0.00781286	0.27156	0.00332407	0.00274091	0.0093507	0.000603179	0.00567121	0.0269995	0.000171455	0.0010103
[truncated: 51 more columns]

## Sheet: Appendix B, Table 1B
ID	Celltype	Run	Treatment	Genotype	ID	16:1 20:5 DAG	16:0 18:0 DAG	16:0 18:1 DAG	16:1 18:0 DAG	16:0 18:2 DAG	16:1 18:1 DAG	16:0 18:3 DAG	16:1 18:2 DAG	16:0 16:0 DAG	16:1 16:1 DAG	16:0 16:1 DAG	16:1 18:3 DAG	16:1 20:4 DAG	16:0 20:5 DAG	16:1 20:2 DAG	16:0 20:3 DAG	16:1 20:1 DAG	16:0 20:2 DAG	16:1 20:0 DAG	16:0 20:1 DAG	16:0 20:0 DAG	16:1 22:6 DAG	16:1 22:5 DAG	16:0 22:5 DAG	16:0 22:4 DAG	16:0 22:3 DAG	16:0 22:2 DAG	16:0 22:1 DAG	15:0 d7-18:1 DAG I S	18:1 18:3 DAG	18:1 18:2 DAG	18:0 18:3 DAG	18:1 18:1 DAG	18:0 18:2 DAG	18:0 18:1 DAG	18:0 18:0 DAG	18:1 20:5 DAG	18:1 20:4 DAG	18:0 20:5 DAG	18:1 20:3 DAG	18:0 20:4 DAG	18:1 20:2 DAG	18:0 20:3 DAG	18:1 20:1 DAG
pread1_r2_100pa1	Pre-adipocyte	1	100µM PA	knockout	Sample 16	1331	4077793	3254431	201141	245470	427645	13698	32009	13527288	248674	1824803	1944	6417	16562	5105	27607	19592	45760	3734	154500	93307	8030	12968	46623	3771	5455	5559	16838	11180	7188	54726	7671	727459	84798	385824	2249297	3433	65008	10237	21792	354750	16807	69686	24206
pread1_r2_100pa2	Pre-adipocyte	1	100µM PA	knockout	Sample 17	752	3871678	2938413	191276	229334	430899	14009	31918	13323178	247696	1807592	1570	5075	14815	5611	26732	17879	43415	3540	156972	88066	6943	11386	43246	4485	4855	4917	14255	12575	4388	53593	6287	717563	73821	365579	1692936	3724	52543	10495	14771	281485	14939	52969	27670
pread1_r2_100pa2	Pre-adipocyte	1	100µM PA	knockout	Sample 18	1482	4070343	3409380	196824	250437	461915	14114	33043	13554958	254560	2019053	2102	5475	19655	5979	25991	22543	48927	4246	157976	95343	9991	11445	46445	7062	3754	4995	19334	10007	5605	51841	8112	785411	94519	383429	2337071	3758	51561	11217	15936	304315	15852	54342	24953
pread2_r2_100pa1	Pre-adipocyte	2	100µM PA	knockout	Sample 58	550	4023917	3045505	169868	228922	374190	13074	21747	14013092	235926	2086972	1093	6326	13029	2134	22529	15825	33420	3021	130521	82957	9359	12196	47415	5553	3502	3982	12886	9116	4834	39974	2040	542617	60688	276813	3007146	4404	33135	8452	6331	138081	6729	22528	15473
pread2_r2_100pa2	Pre-adipocyte	2	100µM PA	knockout	Sample 59	1390	4340852	3311592	182174	237560	372311	13721	24210	14484758	240883	2236042	1118	6141	13997	4107	25278	15297	40202	2333	142415	94700	9844	12414	52164	5185	4484	2858	14825	10111	3832	36462	3372	560333	59444	269348	2885831	3462	35465	7639	5691	133785	7720	25137	17736
pread2_r2_100pa3	Pre-adipocyte	2	100µM PA	knockout	Sample 60	625	4156516	3098947	165329	225386	346695	14231	22726	14118272	211315	2198685	928	7353	14170	2570	21943	11812	34737	2876	136887	87335	7773	13252	47115	5289	2740	4992	15487	11711	2149	35260	2178	526056	62110	280290	3297283	3434	37016	8071	6219	144033	5917	23125	17789
pread1_r2_200pa1	Pre-adipocyte	1	200µM PA	knockout	Sample 22	1517	6221926	2508095	173764	222309	192799	12883	16205	17840344	117354	2013495	647	10723	34565	2716	50185	7477	42845	2718	126369	128408	9066	25338	93050	9801	6092	4641	12716	9790	5108	34635		400631	90657	339820	2520950	3660	70175	28395	9304	398029	9671	64325	12986
pread1_r2_200pa2	Pre-adipocyte	1	200µM PA	knockout	Sample 23		6724458	2762582	179958	227036	191332	12052	12069	18149970	115811	2141552	1602	10261	40080	2176	47308	6966	45898	2630	135106	134750	10879	25520	99853	10780	5905	4655	12907	6689	3484	34838	3680	407038	93005	366893	1769647	4997	71774	24517	9297	387133	6729	60268	12103
pread1_r2_200pa3	Pre-adipocyte	1	200µM PA	knockout	Sample 24	1618	7069178	3136404	183153	248957	225970	14772	20281	18439140	147737	2426232	111	11303	44851	1756	59406	9515	53497	2868	148993	154681	11274	28037	110140	9299	6212	3117	14028	6226	4084	36478	5332	481679	101686	409769	3164528	6447	75777	31275	9035	436543	7956	70138	16608
pread2_r2_200pa1	Pre-adipocyte	2	200µM PA	knockout	Sample 64	1046	5330148	2277895	138121	183444	151157	9676	11656	17306004	88896	1899789	457	9093	28450	2506	45212	4935	36941	1180	99515	98950	10042	22142	86541	10065	4955	4337	10926	4745	1558	30452	3030	376905	62947	275479	3893403	5406	50492	20330	5812	220878	5702	38338	9818
pread2_r2_200pa2	Pre-adipocyte	2	200µM PA	knockout	Sample 65	1588	5292954	2030626	122055	167550	136785	8429	9302	17248258	83039	1755124	456	10953	29272	1316	40688	5150	32865	1447	95563	95272	8992	23457	92509	8518	4679	3849	10341	6496	2843	27540	4401	386194	70262	278996	3595577	5855	53336	20843	6486	228077	5873	40740	11785
pread1_r2_bsa1	Pre-adipocyte	1	BSA	knockout	Sample 10	471	962359	688734	59428	52375	156673	2341	10442	766257	41537	169754	490	2645	4429	3296	8647	11438	22282	2937	44115	18431	4448	4075	15583	5201	3110	1728	6460	6269	4713	31066	3908	640993	49607	267255	2124954	2670	81492	6098	35650	400191	16885	99603	29490
pread1_r2_bsa2	Pre-adipocyte	1	BSA	knockout	Sample 11	418	921311	696351	65550	52195	154967	3600	10975	823129	40433	160253	692	2297	4960	3934	10289	12050	22669	3230	46976	17923	3694	4740	18632	4045	3456	2828	5212	5631	2501	29974	5153	637816	52106	272281	2093581	2757	83137	7560	32875	408997	16589	107057	29445
pread1_r2_bsa2	Pre-adipocyte	1	BSA	knockout	Sample 12	366	1087021	688090	56011	45142	145075	2877	10182	811167	40615	170117	521	2203	5911	3202	6974	13770	19484	3180	49332	18909	3100	3489	17439	5099	2363	3060	7065	7205	2898	27222	2289	571318	41866	270474	2544952	2565	56784	5866	23404	267122	12879	73220	29622
pread2_r2_bsa1	Pre-adipocyte	2	BSA	knockout	Sample 52	382	1201855	682329	53044	54704	159370	2539	10405	878030	37028	169071	814	2319	3490	2957	7096	8515	18754	2135	36886	21266	3583	4518	17999	3585	1982	2096	4651	3218	1963	30897	1862	541355	34494	224915	2882947	1321	30926	3425	12105	131894	11340	32873	25666
pread2_r2_bsa2	Pre-adipocyte	2	BSA	knockout	Sample 53	992	1161375	699596	53926	58948	154891	1887	8975	826758	37808	174526	161	2335	3849	4092	7164	10288	20783	2110	38327	23424	3435	3793	20884	3149	1765	2084	4980	5835	1599	25035	2458	572284	34570	213983	2754408	937	29578	2493	11118	117800	9428	27548	24816
pread2_r2_bsa3	Pre-adipocyte	2	BSA	knockout	Sample 54	482	1355752	618358	48627	48558	133118	2322	6979	899779	31159	150546	154	2359	3300	2431	6470	9328	18752	2296	35475	30710	2786	4466	16717	3812	2698	1780	4590	3933	1753	22254	2987	521958	37766	211709	3585043	1373	24755	2838	9783	103256	10120	22827	21515
pread1_r2_full1	Pre-adipocyte	1	Full Medium	knockout	Sample 4	552	796053	555409	45484	42444	127445	1802	8116	546762	34268	129206	394	2116	2589	1721	8150	10620	15543	2457	35202	13882	3221	2910	15089	3688	2288	1895	5001	5045	2604	24511	6169	530943	42155	263740	2007837	2085	92185	6018	38338	515530	16435	130248	23714
pread1_r2_full2	Pre-adipocyte	1	Full Medium	knockout	Sample 5		961739	595137	61417	44396	142615	2343	8884	746806	37825	137541		1621	3659	2447	7871	9688	16581	3539	36304	15536	2833	5194	14802	4364	1751	1674	5573	5963	2037	27219	3766	617664	51864	288255	2249918	2069	109384	8901	37821	583471	19502	131196	27106
pread1_r2_full2	Pre-adipocyte	1	Full Medium	knockout	Sample 6	136	1021017	675666	59882	52267	153730	2557	9433	771500	34046	153442	344	2001	3305	2433	8492	11619	17670	2610	44260	16632	3313	3667	18126	3755	2121	1693	6316	6504	3424	30991	3248	623771	51176	292706	2165034	1615	98913	8739	39926	537670	17344	113949	30544
pread2_r2_full1	Pre-adipocyte	2	Full Medium	knockout	Sample 46	384	1547437	712768	49899	53207	139618	2628	9217	1086246	53757	248618		2122	4132	3285	6708	10297	18338	2456	33321	27375	2589	3846	14954	3603	2964	1676	4365	6002	1585	23758	2461	522195	39544	229191	3606807	1605	33285	4165	9457	160391	10784	35829	24694
pread2_r2_full2	Pre-adipocyte	2	Full Medium	knockout	Sample 47	656	1717917	914142	69527	66258	182050	4106	9497	1268248	46009	244991	324	1994	4624	2836	9112	12256	25302	2862	54074	36316	4283	4358	19911	3689	3367	2910	5834	8497	2125	33307	2807	723488	54533	306283	4192988	1784	51355	4307	18213	239572	16168	55131	35267
pread2_r2_full3	Pre-adipocyte	2	Full Medium	knockout	Sample 48	238	1438333	715674	52214	53830	128525	3067	6581	979499	27194	176202	204	1471	3932	3437	7477	9177	17942	2653	37279	30307	3540	3875	17199	4113	2280	1500	4660	7173	2305	19972	3024	525062	39298	238005	3229728	2308	36635	2490	9912	167835	9258	30165	26714
pread1_wt_100pa1	Pre-adipocyte	1	100µM PA	wildtype	Sample 13		1815959	1515932	108519	109743	222277	7108	14091	6481383	104606	825349	868	3097	8297	3118	15049	11754	29878	2282	78939	39806	4081	5611	26363	3643	2656	2520	8920	5978	2901	24548	4006	435545	48576	244583	2048161	1140	35118	6659	15402	278761	9866	60662	16757
pread1_wt_100pa2	Pre-adipocyte	1	100µM PA	wildtype	Sample 14	418	2000536	1640844	111863	122666	253245	7802	16657	7037730	119884	920849	296	1650	9328	2998	18221	12009	29423	3623	82413	44865	3379	5955	29680	3864	3250	3442	8120	8143	3203	29708	6234	489637	57838	235877	1962939	1098	31066	6308	16245	279068	12109	56779	18923
pread1_wt_100pa2	Pre-adipocyte	1	100µM PA	wildtype	Sample 15	190	2059628	1737261	119185	128484	242622	6937	14786	7474792	128713	952437	1455	2558	8072	3954	19079	11986	29835	2954	82078	46378	4960	7746	32024	5268	2578	3455	9543	6093	2389	30311	6589	476318	54413	255619	1923002	1190	32032	7037	12914	263946	11773	48725	16979
pread2_wt_100pa1	Pre-adipocyte	2	100µM PA	wildtype	Sample 55	436	2352280	1766792	119536	141814	255850	8076	15959	8521271	124733	1113685	521	1760	9090	2701	14043	10930	29214	2372	65909	38705	5034	8406	32928	5245	2882	2957	7036	7955	3317	23561	4260	458864	49138	234683	3162217	2288	29980	4616	10584	193273	8783	31053	17463
pread2_wt_100pa2	Pre-adipocyte	2	100µM PA	wildtype	Sample 56		2329094	1784632	119385	126954	245605	7978	17290	8462091	132977	1152958	274	2606	9120	2497	15397	9478	25491	2813	70543	42260	4104	7207	29625	4957	1838	2219	8040	5961	2395	24399	2720	400419	46773	202674	3230718	1809	18270	3338	6986	116092	4901	19227	12640
pread2_wt_100pa3	Pre-adipocyte	2	100µM PA	wildtype	Sample 57		2395882	1691979	113988	131573	228415	7414	12561	9339411	115205	1106090		2420	10551	2670	15034	8733	23433	1279	69009	44166	3257	6305	31953	3572	2143	2639	6386	7826	2181	20847	1883	353989	41090	205168	3133076	1352	20675	3360	4102	119821	4943	15856	11728
pread1_wt_200pa1	Pre-adipocyte	1	200µM PA	wildtype	Sample 19		4880681	1727951	125069	152514	153441	10136	13167	15215386	93296	1168940	320	5190	29529	3120	41648	5735	28768	2084	74370	97275	5426	15345	64285	7175	3440	2402	8586	4172	3123	24270	6765	317959	69002	293161	2510411	3444	41591	16135	8343	365918	6932	50921	10854
pread1_wt_200pa2	Pre-adipocyte	1	200µM PA	wildtype	Sample 20	964	5422234	1633744	123984	147002	125337	10530	9082	15853366	76890	1233788	937	5578	31381	1182	38331	5536	24318	2142	67053	115659	5367	17494	63979	8662	3560	2652	7204	2661	3069	18771	3426	270461	70485	290335	2593652	1993	38064	18881	5380	341830	5177	43903	8983
pread1_wt_200pa2	Pre-adipocyte	1	200µM PA	wildtype	Sample 21	471	5037182	1491136	112170	140734	119043	10014	10058	15609406	74887	1066098	278	5609	30162	1084	35295	6026	23606	1992	63122	108071	6706	17055	64044	7979	3470	2441	6636	5118	2935	19580	4975	263414	67691	234311	2380807	3679	36856	16243	4251	318195	5675	43817	7813
pread2_wt_200pa1	Pre-adipocyte	2	200µM PA	wildtype	Sample 61	1141	4849788	1822587	113373	157975	156409	9019	9964	15153834	91230	1414378	441	5352	23437	3110	37042	6360	25598	1887	63839	99282	6582	17415	63367	5658	1697	3419	7354	5689	2585	21411	2731	280726	58742	236447	3364094	2791	32393	11796	4539	198939	5368	32246	8108
pread2_wt_200pa2	Pre-adipocyte	2	200µM PA	wildtype	Sample 62	982	4773620	1682535	114809	145793	141837	9475	9690	15411527	78768	1403894	282	6016	26611	1106	33894	4286	25401	1203	58096	99631	6010	18795	60888	4993	4011	2999	7224	4338	1938	21747	3118	283384	62251	235288	3467009	2920	30478	11700	4337	187658	3510	29938	6152
pread2_wt_200pa3	Pre-adipocyte	2	200µM PA	wildtype	Sample 63	1218	4701748	1606608	116207	146359	129897	9227	7767	15385834	84999	1377636	1072	5368	29032	1421	35624	4685	22521	1742	64169	100943	6067	16190	66531	6241	2977	2097	8858	3677	2061	20513	3107	255210	59341	242569	3139184	3498	30411	10743	3583	176818	4680	30344	7683
pread1_wt_bsa1	Pre-adipocyte	1	BSA	wildtype	Sample 7	747	949567	610910	59673	44372	130036	3052	8267	669391	17456	147504	538	2091	5302	2667	9293	11578	16402	2460	40322	16500	3538	3225	18393	3470	2184	2064	5735	2721	930	26141	2531	519251	45886	265649	1898003	1549	63423	5568	28711	350476	11666	88267	25548
pread1_wt_bsa2	Pre-adipocyte	1	BSA	wildtype	Sample 8	298	841869	603303	58187	41233	130382	2402	8797	649996	33533	139845	441	1852	4600	2747	8645	9595	16829	2242	38225	15154	3437	3888	14255	3846	1852	2796	4651	5074	3010	28123	3956	520817	48799	264907	1841190	3306	75544	4998	30257	396735	14412	99925	25453
pread1_wt_bsa2	Pre-adipocyte	1	BSA	wildtype	Sample 9	699	923141	555596	49005	42902	116413	2743	6839	650778	26948	135492	204	1000	3567	4384	8112	8744	15647	2500	36220	16835	2557	2053	15397	3717	2257	1936	5603	6249	2921	21924	2336	443978	38560	218049	2101998	2579	48896	4165	18781	266686	9946	67498	25192
pread2_wt_bsa1	Pre-adipocyte	2	BSA	wildtype	Sample 49	631	1225278	681409	56653	57104	146017	3573	9988	925580	32875	183233		2224	3810	3155	7386	10155	15576	1673	38416	31044	2454	3162	15262	3526	2647	1282	4583	4830	3190	25067	1541	537430	37665	208082	3209248	2010	36307	2951	15216	176617	10926	48706	24391
pread2_wt_bsa2	Pre-adipocyte	2	BSA	wildtype	Sample 50	282	1258351	659640	50469	51539	137903	2578	10448	906803	33430	174234	696	2499	3105	2032	5787	10147	17160	2073	34536	26047	2728	4637	14126	2786	3059	913	4595	4276	2689	25131	2075	513493	37649	210776	2923907	1480	29662	3246	11186	133263	9731	33239	23544
pread2_wt_bsa3	Pre-adipocyte	2	BSA	wildtype	Sample 51	374	1292950	647183	46671	50287	129411	2137	7162	829677	28273	168034	433	2117	3636	2610	6567	8061	13742	2152	34137	25476	4565	3768	15617	3498	2221	1975	3843	5310	1815	23536	2113	480562	36809	195413	3108983	1486	23065	4278	8042	107460	8717	27021	19898
pread1_wt_full1	Pre-adipocyte	1	Full Medium	wildtype	Sample 1	208	483595	264188	26568	20985	61727	1680	4319	315199	21203	68472	159	638	2998	1298	4430	5157	6004	873	17377	10712	1003	2186	6013	1209	704	773	3074	1583	932	14009	2707	253794	22353	150948	1350410	831	42174	4945	17532	269184	7237	69032	13951
pread1_wt_full2	Pre-adipocyte	1	Full Medium	wildtype	Sample 2	227	685305	341895	30521	22705	68852	1271	4597	364438	22522	81008	139	1162	1673	512	3767	5014	8957	1636	25681	13578	1054	1574	7710	1296	1619	1505	3359	4746	1964	14479	1594	331665	31103	217605	1536875	2158	46047	4329	14986	331511	9699	88565	20205
pread1_wt_full2	Pre-adipocyte	1	Full Medium	wildtype	Sample 3		645962	328738	33598	18901	63785	1597	4021	347392	18392	80899	78	1001	2079		3620	4482	7799	1957	24492	12527	1638	2001	8107	1046	1155	1443	2370	3340	900	13099	963	301516	29302	213425	1326746	994	40571	3136	14718	289448	7112	70073	16990
pread2_wt_full1	Pre-adipocyte	2	Full Medium	wildtype	Sample 43	493	613680	1000257	32531	77465	303065	2845	21138	1278251	440445	1337306	1911	3392	932	10136	12028	13998	25928	1570	23169	11903	2373	1890	8897	5959	8770	4027	2757	4743	1956	30335	1943	522466	25694	108843	1964558	456	22688	2025	16812	103244	21683	49125	29849
pread2_wt_full2	Pre-adipocyte	2	Full Medium	wildtype	Sample 44	516	1298951	927319	49109	79344	246230	4701	22252	1344936	249469	936052	931	2721	2967	7917	8379	12394	25594	2111	32004	23856	2769	3199	16274	4714	5509	2561	4153	5155	2920	34148	2555	571996	41337	193103	3197265	1502	35922	2695	15910	176274	15252	48853	27747
pread2_wt_full3	Pre-adipocyte	2	Full Medium	wildtype	Sample 45	544	1254117	667116	47315	49148	144141	2961	11905	1042633	91254	380527	327	1925	3090	3512	6849	9675	16777	1753	31223	26836	3292	3184	13606	3185	3660	2248	3835	4621	1938	27073	1851	477574	36906	192933	3107397	1424	31282	4449	9993	149815	11740	35591	23199
			Averages	WT	Full	517.667	1.05558e+06	864897	42985	68652.3	231145	3502.33	18431.7	1221940	260389	884628	1056.33	2679.33	2329.67	7188.33	9085.33	12022.3	22766.3	1811.33	28798.7	20865	2811.33	2757.67	12925.7	4619.33	5979.67	2945.33	3581.67	4839.67	2271.33	30518.7	2116.33	524012	34645.7	164960	2.75641e+06	1127.33	29964	3056.33	14238.3	143111	16225	44523	26931.7
				Averages	BSA	344.4	931907	487176	40746.7	36920.2	101282	2139.33	6755.83	614848	26115.8	125980	301	1606.83	2883.5	1921.4	5259.5	7169.33	11539.7	1727.33	29106.5	19897.3	2240.33	2888	11139.2	2226.83	1900.83	1315.17	3637.33	4014.17	1915	19220.2	1832.17	403077	32480.2	199375	2.24269e+06	1493.17	36304.3	3814.17	13613.3	217914	8903.67	56106	19829.8
					100PA	623.667	3.73623e+06	1.68271e+06	119022	140098	187948	9024.67	13019.5	1.21668e+07	102998	1.14026e+06	466	3860.5	19972.2	2209	26624.7	7739.67	25805	2113.67	68334.3	74356	4982.33	11968.7	47802.3	6265	2888.83	2551.67	7314.67	5615.5	2836.67	21904.7	4004.83	344184	57363.2	243389	2.83515e+06	2427.5	30906	10428.8	6607.67	242522	6068.5	34129.5	11580.2
					200PA	847.5	2.83996e+06	1.14692e+06	85209	96439	134162	5986.33	8554	7.98689e+06	55489	769792	496.333	3613.17	15424.8	2572.5	22101.7	7541.33	20399.7	2005.67	50145.2	58057.5	4698.5	10261	39805.2	4654.17	2496.33	2551.83	6570.83	4624.67	2240.83	23309.8	2963.17	383894	52263.2	243818	2.63525e+06	2773.83	46857.5	8161.67	15034.7	262885	8263.67	58036.3	16356
				R2	Full	304	1.95871e+06	1.63135e+06	113189	120298	239381	7282.33	15178	6.99797e+06	117734	899545	873	2435	8565.67	3356.67	17449.7	11916.3	29712	2953	81143.3	43683	4140	6437.33	29355.7	4258.33	2828	3139	8861	6738	2831	28189	5609.67	467167	53609	245360	1978034	1142.67	32738.7	6668	14853.7	273925	11249.3	55388.7	17553
				Averages	BSA	393.2	1.24708e+06	694799	56403.8	52067	145664	2750.5	8621.33	899844	38849.8	181667	316.5	1887.5	3706.83	2693.17	7968.33	10609.5	18562.7	2762.83	40073.3	23341.3	3296.5	3975	16680.2	3868.67	2461.83	1891.33	5291.5	6530.67	2346.67	26626.3	3579.17	590520	46428.3	269697	2.90872e+06	1911	70292.8	5770	25611.2	367412	14915.2	82753	28006.5
					100PA	1278.8	5.7992e+06	2.63576e+06	160397	212447	207456	12007.2	15373.2	1.71837e+07	127359	2.07248e+06	700.167	9947.67	31898	2173.33	44123.7	7642.5	41130.5	2286.5	123739	116566	9671	22957.7	88201.3	8958.67	5097.17	4265.17	12734.2	7609.5	3204.33	33200.5	3724.2	429750	80111.2	325208	3.04023e+06	4966.5	59761.7	22238.5	7692.17	302449	6974.67	49489	13514.8
					200PA	518.5	1.11495e+06	678910	56097.7	51987	150682	2594.33	9659.67	834187	38096.7	165711	472	2359.67	4323.17	3318.67	7773.33	10898.2	20454	2648	41851.8	21777.2	3507.67	4180.17	17875.7	4148.5	2562.33	2262.67	5493	5348.5	2571.17	27741.3	3109.5	580954	41734.8	243436	2.66431e+06	1937.17	51112	4713.33	20822.5	238210	12873.5	60521.3	26759
			T-tests	T-tests	Full x Full	0.0913726	0.0179461	0.00305526	0.000330574	0.0100335	0.870423	0.00449936	0.388657	4.38791e-05	0.231433	0.96007	0.763855	0.703941	0.00145735	0.123617	0.0130931	0.937213	0.0815443	0.0525326	6.61322e-05	0.0101456	0.0659893	0.0096627	0.00374046	0.72325	0.104963	0.773756	0.000862631	0.058142	0.236336	0.443555	0.0140467	0.147921	0.0243918	0.0484224	0.122489	0.965938	0.532333	0.00866003	0.807233	0.00396138	0.171855	0.12851	0.0107413
				WT x KO	BSA x BSA	0.702539	0.168313	0.0525899	0.0286901	0.0888386	0.0369994	0.220561	0.173419	0.110227	0.0213674	0.102271	0.912664	0.418337	0.097482	0.164396	0.00372006	0.0149178	0.0132035	0.00220205	0.036164	0.520003	0.108029	0.0863998	0.0178634	0.00783615	0.231767	0.062564	0.00552435	0.00673365	0.364261	0.0400672	0.0155443	0.010266	0.00395798	0.00153905	0.234668	0.119509	0.0377969	0.110551	0.0797934	0.12444	0.0062721	0.247868	0.00621439
					100x100	0.0622246	0.0218583	0.000468768	0.002503	0.000247845	0.635585	0.0282915	0.373881	0.0126211	0.289444	2.87703e-06	0.390285	7.49065e-05	0.0915838	0.933161	0.0395939	0.94698	0.00103846	0.653565	0.000102873	0.0444111	6.99251e-05	0.00428882	0.00553166	0.0388445	0.00497753	0.000180114	8.32413e-05	0.172744	0.526807	6.77704e-05	0.768644	0.0561173	0.027035	0.015515	0.57341	0.00218956	0.00283406	0.0249746	0.403848	0.394093	0.334301	0.136212	0.323205
					200x200	0.0799616	0.0750143	0.0919515	0.0569417	0.0951442	0.036475	0.0446931	0.181768	0.0540847	0.22817	0.0573077	0.887041	0.193337	0.0493523	0.202901	0.0392571	0.0396848	0.979115	0.0546975	0.19026	0.0830552	0.137067	0.0912631	0.0676573	0.402252	0.884293	0.408449	0.181111	0.393071	0.574116	0.0437141	0.796381	0.00487204	0.0573451	0.979089	0.941458	0.0831641	0.757596	0.0697918	0.424918	0.728232	0.0644867	0.904001	0.0352103
					WT bsa 200	0.0155065	5.66644e-11	1.43941e-09	1.85455e-09	5.98001e-11	0.441587	8.1519e-10	0.17606	2.89445e-17	9.6104e-08	3.70004e-09	0.611684	4.22363e-08	2.1961e-09	0.061871	4.26113e-10	3.11147e-05	4.03812e-06	0.09711	3.82136e-07	1.44023e-09	3.54955e-05	6.34832e-10	2.6017e-13	0.000233309	0.0506379	0.0293091	0.000116435	0.488891	0.652908	0.00728821	0.0506151	9.68895e-08	1.14779e-05	0.12766	0.248082	0.032007	0.218464	3.00052e-05	0.00487029	0.669103	0.000122401	0.108059	4.85457e-08
					R2 bsa 200	0.000426084	1.07939e-07	1.96286e-06	8.28722e-06	1.06098e-06	0.0875438	1.37391e-05	0.0500385	3.60658e-14	7.55966e-05	2.04086e-08	0.497491	2.61393e-09	1.83539e-06	0.0079259	1.92432e-07	0.00614519	9.89427e-05	0.258857	1.79084e-05	4.5477e-06	3.07677e-07	3.51755e-09	5.70267e-09	1.70334e-06	4.294e-05	0.000620438	1.1074e-05	0.185183	0.28896	0.046795	0.211016	0.000171798	0.000316919	0.00807537	0.465832	0.000215247	0.332661	5.26302e-06	0.0369365	0.238528	0.00610856	0.75627	2.70652e-05
			Fold Changes	FC	Full	0.58725	1.85557	1.88617	2.63322	1.75227	1.03563	2.07928	0.823474	5.72693	0.452147	1.01686	0.826444	0.908808	3.67678	0.46696	1.92064	0.991183	1.30508	1.63029	2.81761	2.0936	1.47261	2.33434	2.27111	0.92185	0.472936	1.06575	2.47399	1.39224	1.2464	0.923664	2.65065	0.891519	1.54735	1.48739	0.717613	1.0136	1.0926	2.1817	1.04322	1.91407	0.693333	1.24405	0.651761
					Bsa	1.1417	1.33821	1.42618	1.38426	1.41026	1.43819	1.28568	1.27613	1.46352	1.4876	1.44203	1.0515	1.17467	1.28553	1.40167	1.51504	1.47984	1.6086	1.59948	1.37678	1.17309	1.47143	1.37639	1.49743	1.7373	1.29513	1.43809	1.45477	1.6269	1.22541	1.38533	1.95352	1.46503	1.42944	1.35271	1.29697	1.27983	1.93621	1.51278	1.88133	1.68604	1.67517	1.47494	1.41234
					100	2.05045	1.55215	1.56638	1.34762	1.51641	1.10379	1.33048	1.18078	1.41234	1.23652	1.81755	1.5025	2.57678	1.59712	0.983854	1.65725	0.987446	1.5939	1.08177	1.81079	1.56767	1.94106	1.91815	1.84513	1.42995	1.76444	1.67152	1.74091	1.35509	1.12961	1.51568	0.929926	1.24861	1.39656	1.33617	1.07234	2.04593	1.93366	2.13241	1.16413	1.2471	1.14932	1.45004	1.16707
					200	0.611799	0.392593	0.59194	0.658354	0.539066	1.12313	0.433376	1.12926	0.104444	0.686563	0.215268	0.950974	0.653074	0.280273	1.29006	0.351708	1.44512	1.00266	1.32026	0.834614	0.375097	0.74655	0.407384	0.449079	0.891352	1.02644	0.886683	0.835967	1.15652	1.14742	1.19011	1.04938	1.51332	0.798552	0.998433	1.01103	0.698372	1.0908	0.577496	1.38497	0.906137	1.55784	1.04282	1.63604
					WT bsax200	2.4608	3.04747	2.35423	2.09119	2.6121	1.32463	2.79822	1.26617	12.99	2.12473	6.11043	1.64895	2.24863	5.34934	1.33887	4.20224	1.05189	1.76779	1.16113	1.72282	2.91785	2.09723	3.55298	3.57344	2.09004	1.31328	1.94031	1.8065	1.15209	1.17015	1.21278	1.6173	0.95241	1.60908	1.22291	1.17504	1.85769	1.29069	2.13983	1.10441	1.20637	0.92812	1.03441	0.824818
					R2 bsax200	1.31867	0.894043	0.977131	0.994572	0.998464	1.03445	0.943222	1.12044	0.927035	0.980613	0.912172	1.49131	1.25015	1.16627	1.23225	0.975528	1.02721	1.10189	0.958436	1.04438	0.932987	1.06406	1.05161	1.07167	1.07233	1.04082	1.19633	1.03808	0.818982	1.09567	1.04188	0.868778	0.9838	0.898909	0.902629	0.915975	1.01369	0.72713	0.816869	0.813024	0.648347	0.863115	0.731349	0.955457
[truncated: 25 more columns]

## Sheet: Appendix B, Table 1C
Sample ID	ID	Celltype	Run	Treatment	Genotype	16:0 20:3 PI	16:0 20:4 PI	16:0 20:5 PI	16:0 18:0 PI	16:0 18:1 PI	16:0 18:2 PI	16:0 18:3 PI	16:0 16:0 PI	18:0 22:4 PI	18:0 22:5 PI	18:0 22:6 PI	16:0 22:4 PI	16:0 16:1 PI	16:0 22:5 PI	16:0 22:6 PI	16:0 20:3 PC	16:0 20:4 PC	16:0 20:5 PC	16:0 18:0 PC	16:0 18:1 PC	16:0 18:2 PC	16:0 18:3 PC	16:0 16:0 PC	16:0 22:4 PC	16:0 22:5 PC	16:0 22:6 PC	16:0 20:0 PC	16:0 20:1 PC	18:0 22:1 PC	18:0 22:2 PC	18:0 22:6 PC	16:0 22:0 PC	18:0 22:3 PC	18:1 22:6 PC	16:0 18:2 PG	16:0 20:3 PG	16:0 20:0 PG	16:0 20:5 PG	16:0 18:0 PG	16:0 16:0 PG	16:0 22:4 PG	16:0 22:5 PG	16:0 22:6 PG	16:0 18:1 PG
S34	adipo1_r2_250pa1	Adipocyte	1	250µM PA	knockout	1.56294	1.06424	0.00709752	0.259052	3.27145	0.636573	0.0949369	0.442851	0.179334	0.0684019	0.0138023	0.067024	0	0.0296942	0.00170441	1.13133	1.06806	0.0637509	3.02191	17.2948	2.18162	0.137697	36.9802	0.174408	0.136878	0.151057	0.0737695	1.1348	0.436106	0.268031	0.0431515	0.108873	0.0137688	0.202013	0.00446112	0.00924275	0.00545732	0.000711942	0.00481428	0.0658677	0.000916885	0.000181372	0.000123765	0.0221637
S35	adipo1_r2_250pa2	Adipocyte	1	250µM PA	knockout	1.71136	0.964453	0.00687436	0.305822	3.19945	0.700791	0.129415	0.444608	0.151814	0.0452848	0.00604614	0.0777009	0.0521781	0.0111536	0.00550397	1.07042	0.982956	0.0770834	2.84133	15.8707	2.13131	0.144094	35.2353	0.151912	0.144148	0.148704	0.0801167	0.87558	0.409523	0.290647	0.0645702	0.114472	0.00684354	0.196371	0.00373571	0.0105031	0	0.000876968	0.00579025	0.0556462	0.000152859	0.000404666	3.46497e-05	0.0170077
S36	adipo1_r2_250pa3	Adipocyte	1	250µM PA	knockout	1.56915	1.07427	0.00412386	0.341614	3.03392	0.632779	0.131301	0.377974	0.145577	0.0336481	0.0205686	0.0773581	0	0.021737	0.000199268	1.01112	0.910439	0.0596314	2.78346	15.9411	2.29383	0.116308	34.9572	0.125838	0.120135	0.123501	0.0684935	1.09984	0.395088	0.27696	0.0636531	0.12011	0.0174572	0.181577	0.00375412	0	0.00836661	0.000395932	0.00359451	0.0517851	0.00131817	0.000200681	0	0
S82	adipo2_r2_250pa1	Adipocyte	2	250µM PA	knockout	1.61609	1.08907	0.0126241	0.441472	3.69364	0.75753	0.15449	0.635986	0.117187	0.057837	0.0171649	0.0599651	0	0.0290868	0.004905	0.982269	0.973276	0.0567096	2.78905	10.5072	3.24722	0.20755	35.4786	0.144563	0.10853	0.144911	0.0756812	1.07342	0.421901	0.307051	0.0496481	0.136808	0.00381299	0.166689	0	0.00453834	0.00928796	0.000269047	0.00738117	0.0556532	0.000547557	0.00015752	0.000181981	0.0232982
S83	adipo2_r2_250pa2	Adipocyte	2	250µM PA	knockout	1.78919	1.22485	0.000681775	0.868408	4.40034	0.861878	0.120846	0.817706	0.199316	0.0915641	0.0461596	0.0947678	0	0.0308181	0.00255411	0.952632	1.00683	0.0601997	2.91043	11.5474	3.56886	0.231635	40.0027	0.113569	0.105757	0.137697	0.0872727	0.988801	0.402305	0.283722	0.0380173	0.15604	0	0.168784	0.00401602	0	0.00909356	0.000396239	0.00374644	0.0462164	0	0.000501213	7.75363e-06	0.0246528
S84	adipo2_r2_250pa3	Adipocyte	2	250µM PA	knockout	1.72129	1.04639	0.00322448	0.553458	4.51037	0.836895	0.115329	0.788766	0.188277	0.0945576	0.0394065	0.0758267	0	0.0222068	0.011646	0.829069	0.860034	0.053665	3.11711	10.6299	3.23206	0.190039	30.173	0.117788	0.0988353	0.134907	0.0957047	0.934827	0.337024	0.227236	0.0380591	0.126755	0.00403362	0.176377	0.00526853	0.0117731	0.00522998	0.000514063	0.00773352	0.0615427	0.000787039	0.000337042	7.20408e-06	0.0342101
S40	adipo1_r2_500pa1	Adipocyte	1	500µM PA	knockout	1.52191	1.13874	0.00703956	0.293613	3.70104	0.713467	0.146128	0.878511	0.15729	0.0622096	0.0215953	0.0661326	0.0830175	0.0211703	0.00628836	1.05846	1.01811	0.0634336	3.23127	15.4179	2.28589	0.120071	46.3492	0.160349	0.12109	0.146444	0.0601388	1.08742	0.401615	0.263756	0.0570776	0.119933	0.00761722	0.168032	0.00768455	0.0051033	0.0105138	0.000560129	0.00603021	0.0581179	0.000506649	0.000129234	0	0.0231786
S41	adipo1_r2_500pa2	Adipocyte	1	500µM PA	knockout	1.74185	1.02974	0.00981436	0.297531	3.60864	0.71084	0.106216	0.734728	0.134142	0.0743042	0.019133	0.0927336	0	0.0286248	0.00276007	0.919282	0.95277	0.0672299	2.72774	14.0066	2.09163	0.116666	41.9248	0.146594	0.119778	0.147327	0.0713676	0.819552	0.398388	0.258042	0.0577946	0.130025	0.0122855	0.170404	0.00461995	0.00288183	0.0084962	0.000215762	0.00489406	0.0621948	0.000436073	0.00052569	8.66515e-05	0
S42	adipo1_r2_500pa3	Adipocyte	1	500µM PA	knockout	1.76277	1.13863	0.00308382	0.551043	3.46353	0.681023	0.110682	0.729963	0.161738	0.0506807	0.0121248	0.067289	0	0.0216505	0.00559558	0.967313	1.01039	0.0312411	2.84655	14.5683	2.06694	0.129778	41.9005	0.137723	0.132918	0.119306	0.0474482	0.879431	0.38586	0.280998	0.0457354	0.131714	0.0126142	0.184724	0.00704968	0	0.00928687	0.000420245	0.00643478	0.0645486	0.000688482	0.000288527	0	0.0192129
S88	adipo2_r2_500pa1	Adipocyte	2	500µM PA	knockout	1.69906	1.39388	0.00639542	0.700946	5.04471	0.897497	0.169001	1.48176	0.151203	0.0638373	0.0317258	0.0641259	0	0.0492561	0.0137951	0.929012	0.911494	0.0227645	2.9883	9.88783	3.33997	0.190387	53.9401	0.105619	0.0899375	0.125562	0.0643941	0.958773	0.333866	0.243581	0.0397891	0.118662	0.00394973	0.142739	0.00490879	0.00949603	0.00834111	0.000122935	0.0095446	0.0722021	0.00125497	0	2.52301e-05	0.0339957
S89	adipo2_r2_500pa2	Adipocyte	2	500µM PA	knockout	1.93953	1.21438	0.00938226	0.673208	5.38722	1.01923	0.123539	1.63255	0.194226	0.0941648	0.0191213	0.0749947	0	0.0587255	0.0219463	0.877729	0.877125	0.0579434	2.81507	18.6236	3.52113	0.182846	41.4635	0.108529	0.0898042	0.145084	0.0511588	1.07974	0.357013	0.232514	0.0383326	0.144727	0.00470611	0.157744	0.00564334	0.00590426	0.0095477	0.000306619	0	0.0909158	0.000913542	0.000289077	0.000116609	0.0266113
S90	adipo2_r2_500pa3	Adipocyte	2	500µM PA	knockout	1.98786	1.34284	0.019269	0.844533	5.56709	0.949869	0.167268	1.61079	0.204896	0.0799064	0.0398307	0.12867	0	0.0357618	0.0132416	0.884126	0.912221	0.0595706	6.59827	10.852	3.28759	0.134349	57.6769	0.120704	0.101177	0.143931	0.0564913	1.20868	0.364167	0.251904	0.0420092	0.142134	0.0016682	0.146126	0.0034312	0.00627835	0.0103448	0.000303003	0.00608627	0.0784791	0.000754474	0.00016304	5.2694e-05	0.033287
S28	adipo1_r2_bsa1	Adipocyte	1	BSA	knockout	1.42789	0.915619	0.00236336	0.277915	2.68284	0.583418	0.0973902	0.31701	0.110628	0.0576948	0.00997297	0.0608873	0.0423435	0.0227893	0.00100529	0.794396	0.714342	0.0382482	2.38429	13.4719	2.27623	0.119453	22.8052	0.0990477	0.0765546	0.0869392	0.0516697	0.691514	0.360515	0.233581	0.0373648	0.106326	0.0112514	0.134737	0.00479551	0.00973205	0	0.0002841	0.00507352	0.0408442	0.000725731	0.000176815	1.64526e-05	0.016972
S29	adipo1_r2_bsa2	Adipocyte	1	BSA	knockout	1.44714	0.883904	0.00204797	0.389203	2.8779	0.543476	0.08639	0.380798	0.135781	0.0356642	0.0247981	0.0457429	0	0.0178531	0.00218998	0.801331	0.709268	0.0507909	2.22517	13.673	2.33649	0.0822304	22.7955	0.119725	0.0880935	0.0896846	0.0512576	0.885747	0.375481	0.252335	0.0338617	0.108814	0.0100419	0.151998	0.00507821	0.00425442	0.00749266	0	0.00459152	0.0406574	0.000408763	0	9.72482e-05	0.0270216
S30	adipo1_r2_bsa3	Adipocyte	1	BSA	knockout	1.31872	0.850679	0.00973715	0.418957	2.7442	0.541987	0.10845	0.282144	0.129155	0.0401477	0.00703769	0.0683409	0.0382231	0.0244485	0.0010815	0.676818	0.627794	0.0310138	2.0081	11.2444	2.22179	0.130304	19.4415	0.0877789	0.0698844	0.0740919	0.0710536	0.60899	0.337608	0.230966	0.0332239	0.103911	0.00854634	0.128135	0.00394422	0.00711009	0.00836235	0.000802405	0.00396584	0.0392026	0.0006071	0	8.64464e-05	0.0237616
S76	adipo2_r2_bsa1	Adipocyte	2	BSA	knockout	1.26023	0.678478	0.00373053	0.363282	3.10249	0.573678	0.0840854	0.383225	0.124989	0.0699524	0.0131931	0.0760515	0	0.0116423	0.0113221	0.89927	0.746688	0.0497786	2.6162	10.6446	3.41951	0.166296	26.0051	0.123477	0.0927402	0.117912	0.088259	1.09603	0.417	0.269015	0.0513746	0.132539	0.00514733	0.160264	0.00133796	0	0.00387419	0.000152786	0.00701034	0.0455117	0.00100685	6.1547e-05	0	0.0254298
S77	adipo2_r2_bsa2	Adipocyte	2	BSA	knockout	1.30811	0.806821	0.00697275	0.367078	3.25748	0.564091	0.0983624	0.367851	0.105662	0.0578503	0.0212184	0.0682251	0	0.00266406	0.00368203	0.822095	0.657476	0.0427358	2.74127	10.3524	3.01311	0.09842	25.417	0.119312	0.0876135	0.100506	0.10705	1.15343	0.349632	0.2402	0.0433027	0.115529	0.0045545	0.147816	0	0.00823529	0.00846418	0.000400654	0.00525335	0.0455998	0.000869694	0.00065021	0.000145077	0.0258951
S78	adipo2_r2_bsa3	Adipocyte	2	BSA	knockout	1.26168	0.84249	0.00423693	0.386857	3.02101	0.503976	0.0952886	0.430715	0.106465	0.0426261	0.019605	0.0542559	0	0.0206298	0.00145245	0.909644	0.817817	0.0516992	2.53161	9.08177	3.02187	0.212699	23.082	0.123077	0.0801931	0.0941549	0.0697044	1.05167	0.414844	0.294068	0.0448507	0.127841	0.00536143	0.160001	0.00572636	0.00793535	0	0.000279085	0.00462468	0.0455412	0.00109791	0.0012254	3.67767e-05	0.0287301
S70	adipo2_r2_full1	Adipocyte	2	Full Medium	knockout	1.42667	0.886753	0.0140123	0.384574	3.9058	0.586066	0.104835	0.511645	0.106625	0.0808396	0.0173385	0.0623849	0	0.0181325	0.0199166	0.769755	0.650034	0.0494919	3.14464	12.0871	3.10901	0.149377	28.2451	0.119186	0.0995334	0.115114	0.0995103	1.12704	0.370077	0.262604	0.0545414	0.132523	0.00709226	0.200502	0.00516601	0.0108522	0	0.00042707	0.00714373	0.0468466	0.000525347	0.000889655	2.45166e-06	0.0386698
S71	adipo2_r2_full2	Adipocyte	2	Full Medium	knockout	1.42569	0.979204	0.00442468	0.810481	3.79855	0.649501	0.0858031	0.520935	0.166175	0.0881727	0.0240846	0.028392	0	0.0334507	0.00132446	0.63938	0.612053	0.0506976	1.96833	8.4036	2.79545	0.177844	17.8125	0.107236	0.0735125	0.0952467	0.04394	0.849463	0.319413	0.217709	0.0398137	0.108451	0.00170593	0.143321	0.00257502	0.00860641	0.0102304	0	0.00769256	0.0616725	0	0.000543241	4.03957e-05	0.0269823
S72	adipo2_r2_full3	Adipocyte	2	Full Medium	knockout	1.41621	0.899054	0.00743823	0.433097	3.742	0.584481	0.145505	0.464522	0.129244	0.0809309	0.0212777	0.0680215	0	0.0294451	0.00667342	0.79853	0.688359	0.0253902	2.8344	11.1898	3.11673	0.180373	25.6962	0.109262	0.0954384	0.120878	0.0731406	1.28509	0.372044	0.261879	0.0601337	0.124478	0.00746368	0.169748	0.00503908	0	0.00409643	0.000497201	0.00599097	0.057254	0.000807237	0.000588506	7.96544e-06	0.0274247
S31	adipo1_wt_250pa1	Adipocyte	1	250µM PA	wildtype	1.59575	1.00398	0.0068869	0.465126	3.34893	0.558513	0.0970661	0.419981	0.148338	0.0715327	0.024016	0.0450368	0.0780368	0.0206148	0.00362805	1.00466	0.864658	0.0651556	2.03399	15.0887	2.15765	0.14807	18.8365	0.132205	0.111464	0.109915	0.0391551	0.618166	0.376741	0.257449	0.0471409	0.132577	0.0154119	0.155146	0.0054045	0.00569669	0	0.000351751	0.00530651	0.046125	0	0.000279906	0.000111328	0.0316484
S32	adipo1_wt_250pa2	Adipocyte	1	250µM PA	wildtype	1.58244	1.00213	0.00241706	0.259417	3.11701	0.61479	0.0993037	0.406384	0.196126	0.0971378	0.0215368	0.0663315	0.0388733	0.0128395	0.00252749	1.09941	1.00875	0.0651465	2.14755	15.4351	2.03616	0.11887	17.4657	0.151026	0.131389	0.101415	0.0471687	0.625057	0.429994	0.304414	0.0526857	0.139982	0.0121529	0.175733	0	0.00649546	0.0120846	0.000150846	0.00537768	0.0443202	0.0012209	0.000198587	5.03216e-05	0.0257311
S33	adipo1_wt_250pa3	Adipocyte	1	250µM PA	wildtype	1.37155	1.00598	0.000891695	0.391745	2.92493	0.558018	0.0780361	0.420363	0.153929	0.0778192	0.026681	0.0613749	0.0425943	0.0128744	0.0052662	1.05677	1.01716	0.0648993	2.12716	15.4804	2.12496	0.152072	17.848	0.140095	0.0899027	0.122509	0.0479649	0.639325	0.395241	0.272231	0.0531125	0.115283	0.0118252	0.150319	0.00336252	0.00674472	0.00943427	0.000346405	0.00603375	0.0314706	0.000443173	0.0004912	1.16718e-05	0.0220192
S79	adipo2_wt_250pa1	Adipocyte	2	250µM PA	wildtype	1.42643	0.958632	0.00123741	0.351247	3.73822	0.668767	0.109551	0.58065	0.201983	0.0499059	0.0146167	0.0579109	0	0.0210744	0.006348	1.05464	1.13343	0.0543664	2.09851	11.1436	3.08948	0.249825	18.8148	0.143143	0.121518	0.0963725	0.0436376	0.697776	0.448078	0.305471	0.0461068	0.171528	0.00571265	0.130649	0.00382669	0	0.00730234	0.000355906	0.00542377	0.0433572	0.000206172	0.000307088	6.19496e-05	0.0230585
S80	adipo2_wt_250pa2	Adipocyte	2	250µM PA	wildtype	1.46296	0.996563	0.00291994	0.302887	3.94508	0.648407	0.127143	0.622993	0.127556	0.0566328	0.0295386	0.0702325	0.0949498	0.0243969	0.00642311	0.778055	0.832833	0.044156	2.04092	10.7314	2.72046	0.195875	20.6687	0.114482	0.0878155	0.0885782	0.0422165	0.597159	0.31742	0.212423	0.0366497	0.134149	0.00498385	0.113605	0.00551923	0.00292209	0.00738395	0.000146858	0.00620667	0.0442747	0.000827046	0.000174045	1.08771e-05	0.0197901
S81	adipo2_wt_250pa3	Adipocyte	2	250µM PA	wildtype	1.32701	1.04705	0.00451104	0.480423	4.24847	0.705472	0.106257	0.925898	0.206411	0.0620068	0.0422257	0.0876557	0.1383	0.0273852	0.0059444	0.917449	1.03948	0.0548948	2.18115	10.1624	2.70125	0.173831	24.1416	0.128328	0.112433	0.118943	0.049305	0.633316	0.337723	0.261357	0.0498449	0.137009	0.00279357	0.126487	0.00361984	0.00622172	0.0086037	0.00132411	0.00506517	0.0819321	0.000976926	0.000361573	0	0.0256178
S37	adipo1_wt_500pa1	Adipocyte	1	500µM PA	wildtype	1.38562	0.954598	0.00819128	0.261135	3.11009	0.571007	0.0973342	0.462362	0.182578	0.0681169	0.010417	0.0794404	0.0336796	0.0162462	0.00167973	0.984609	0.975399	0.050101	0.977176	15.082	2.27632	0.105101	20.3712	0.11343	0.094619	0.124444	0.0379497	0.674264	0.369062	0.267586	0.0488263	0.128733	0.0116286	0.127907	0	0.00737557	0.00825828	0.000144013	0.00566658	0.0460811	0.000908127	0	0.000111303	0.0241328
S38	adipo1_wt_500pa2	Adipocyte	1	500µM PA	wildtype	1.57791	1.02683	0.0044654	0.479074	3.49432	0.670796	0.102348	0.557421	0.213256	0.079934	0.0261018	0.0637554	0	0.011776	0.003452	1.01466	1.10592	0.0644615	1.81523	15.4187	2.6237	0.190219	18.1882	0.106585	0.107642	0.103251	0.0388367	0.577224	0.401105	0.286805	0.0356813	0.150188	0.0129082	0.102331	0.00453695	0.00699322	0	0.000283855	0.00761602	0.0376298	0.00060973	0.000441646	0	0.029181
S39	adipo1_wt_500pa3	Adipocyte	1	500µM PA	wildtype	1.66849	1.08255	0.00501043	0.547413	3.6029	0.637267	0.102728	0.551191	0.189262	0.0684645	0.0135785	0.0756373	0	0.0279049	0.0106231	1.08204	1.07578	0.0665232	2.10569	16.6563	2.67484	0.181493	20.6541	0.130835	0.110224	0.121333	0.0445089	0.634861	0.447632	0.292173	0.0503837	0.138205	0.0189824	0.122701	0.00388048	0	0	0.000280365	0.00860492	0.0420955	0.000713204	0	0.000144325	0.0230483
S85	adipo2_wt_500pa1	Adipocyte	2	500µM PA	wildtype	1.76258	1.25547	0.00681885	0.455504	4.85708	0.83837	0.13514	1.02836	0.183036	0.0717752	0.019843	0.0841941	0.105862	0.0246153	0.0149979	1.10761	1.04503	0.0465798	2.09978	11.1369	3.19064	0.211472	22.9997	0.129404	0.102206	0.114091	0.0557639	0.629852	0.388299	0.292569	0.0466988	0.149584	0.00372784	0.131319	0.00633711	0.00677081	0.00979612	0.000700764	0.00642797	0.0445271	0.000235604	0	4.66765e-05	0.0249837
S86	adipo2_wt_500pa2	Adipocyte	2	500µM PA	wildtype	1.78312	1.24277	0.0045078	0.406373	4.87168	0.843595	0.151976	1.06013	0.166574	0.0930485	0.0239064	0.0957016	0	0.0252658	0.00955289	0.937685	1.04487	0.0430535	2.3937	11.2904	3.0807	0.236062	26.346	0.100017	0.0970944	0.107749	0.0560951	0.640586	0.351954	0.229425	0.0441511	0.129589	0.00491578	0.114137	0.00404104	0.00594743	0	0.000471924	0.00557741	0.0547739	0.00141489	0.000378806	3.18114e-05	0.026764
S87	adipo2_wt_500pa3	Adipocyte	2	500µM PA	wildtype	1.80312	1.23425	0.00278709	0.493791	4.73512	0.836895	0.161312	1.05666	0.138976	0.0846584	0.0504994	0.100496	0.0744539	0.0402321	0.0174613	0.931998	1.04451	0.0460801	2.30725	11.4243	3.1457	0.215674	19.6144	0.121501	0.0934837	0.111479	0.0440986	0.593666	0.377681	0.250748	0.0470751	0.135716	0.00473324	0.126666	0.00526508	0.004205	0.0124093	0.000266093	0.00998783	0.0640401	0	0.000167936	0.000108661	0.0352565
S25	adipo1_wt_bsa1	Adipocyte	1	BSA	wildtype	1.19603	0.683645	0.0040065	0.229751	2.6393	0.434841	0.0714989	0.325648	0.118845	0.0684156	0.00884844	0.0512195	0	0.0143986	0.00452506	0.955564	0.949153	0.0562756	2.31085	12.5627	2.26499	0.131904	15.897	0.119283	0.116584	0.119191	0.0486257	0.747889	0.474655	0.340784	0.0521059	0.150666	0.0144014	0.155812	0.00404924	0	0.00522673	0	0.00471304	0.0431216	0.000678059	0.000358113	9.44908e-05	0.0311184
S26	adipo1_wt_bsa2	Adipocyte	1	BSA	wildtype	1.21809	0.810498	0.00284651	0.460631	2.66792	0.466165	0.0889423	0.310603	0.137026	0.0703029	0.0194913	0.0381563	0	0.0129649	0.00686847	0.750642	0.896682	0.0409065	1.71396	12.195	2.32018	0.166841	12.7825	0.0901586	0.0991718	0.047442	0.0397499	0.568336	0.440495	0.294098	0.0373638	0.156553	0.0139121	0.099413	0.00408248	0.00744373	0.00862585	0.000326734	0.00515369	0.0324025	0	0.000193397	0	0.0303957
S27	adipo1_wt_bsa3	Adipocyte	1	BSA	wildtype	1.27245	0.79457	0.00159378	0.271409	2.60473	0.498452	0.0996924	0.327456	0.134303	0.0639207	0.0335981	0.0599918	0.072592	0.0149644	0.000415719	0.856546	0.950766	0.0570428	1.9809	13.7876	2.6184	0.198252	14.1589	0.101498	0.109771	0.0901508	0.0532397	0.730871	0.482225	0.335697	0.0372754	0.153674	0.0105698	0.120081	0.0066986	0.00610144	0.00970524	0.000421408	0.00700195	0.030505	0.000764368	0.000210746	7.82842e-05	0.0303119
S73	adipo2_wt_bsa1	Adipocyte	2	BSA	wildtype	1.43531	0.867972	0.00437798	0.614164	3.79984	0.581772	0.0993805	0.556344	0.136954	0.0362349	0.0142253	0.0421997	0	0.0163373	0.0151005	0.906144	0.92354	0.0472412	2.26014	11.9984	3.24535	0.178749	17.6157	0.11487	0.0985503	0.121969	0.0709392	0.843699	0.455483	0.294679	0.0464606	0.136919	0.00441939	0.147635	0	0.00670708	0.00566843	0	0.00469951	0.0362298	0	0.000290165	6.4075e-05	0.0230732
S74	adipo2_wt_bsa2	Adipocyte	2	BSA	wildtype	1.33335	0.867104	0.00292887	0.26876	3.36364	0.557708	0.112485	0.476681	0.121915	0.0437208	0.016747	0.0429609	0	0.0249454	0.00495543	0.992286	0.913534	0.0469755	2.33174	10.9796	3.10241	0.21279	17.4047	0.147693	0.104276	0.132992	0.0676263	0.934898	0.485015	0.324714	0.053837	0.152184	0.0052088	0.193443	0.00531721	0.00773758	0	0.000415175	0.00434295	0.0445393	0.000541966	0.000260288	0.000161786	0.0348631
S75	adipo2_wt_bsa3	Adipocyte	2	BSA	wildtype	1.27034	0.848733	0.000690929	0.491065	3.41435	0.554733	0.108457	0.488002	0.123361	0.0462253	0.0209514	0.0412606	0.0825449	0.00961207	0.0113827	0.848599	0.716561	0.0367716	2.03728	10.831	2.83347	0.166425	15.4053	0.110087	0.0846909	0.0817282	0.048551	0.711437	0.366108	0.247393	0.0528957	0.132878	0.00158214	0.12493	0.00700924	0.00608894	0.00815646	0.000265289	0.00715307	0.0374521	0.000520739	0.00034907	0.000117115	0.0310542
S67	adipo2_wt_full1	Adipocyte	2	Full Medium	wildtype	1.34988	0.972883	0.00705175	0.469752	3.79533	0.663401	0.108083	0.551703	0.114988	0.0681192	0.0209721	0.0687869	0	0.0491772	0.00374919	0.8652	0.694804	0.0433249	2.40349	12.0023	2.77356	0.0959982	17.5257	0.110735	0.103663	0.0920931	0.0470486	0.679393	0.337576	0.272937	0.0622169	0.116984	0.00655325	0.159398	0.0045786	0.00743854	0.00694572	0.000223092	0.0037436	0.0567461	0	0	4.06002e-05	0.0303212
S68	adipo2_wt_full2	Adipocyte	2	Full Medium	wildtype	1.37172	0.90111	0.0041034	0.42488	3.82829	0.634692	0.113078	0.605008	0.140607	0.0872639	0.026878	0.0454139	0	0.0146613	0.00939969	0.89837	0.810127	0.0505667	2.55821	13.2647	3.0632	0.239963	18.8876	0.111412	0.0913912	0.128627	0.0540614	0.863528	0.42708	0.283451	0.057194	0.148239	0.0127775	0.17071	0.00507753	0.00743974	0	0.000417161	0.0057097	0.0542435	0.00106725	0.000235239	7.86903e-05	0.023878
S69	adipo2_wt_full3	Adipocyte	2	Full Medium	wildtype	1.30691	0.904218	0.00945495	0.431747	3.78744	0.562885	0.11712	0.495476	0.128597	0.067163	0.0167749	0.0643568	0	0.0118671	0.00206733	0.821651	0.823258	0.0670532	2.21999	11.6195	2.88975	0.119806	16.3213	0.107066	0.0969566	0.0926188	0.0565248	0.857244	0.368449	0.244085	0.036115	0.125049	0.00370861	0.141968	0.00440473	0.0111091	0	0.000610477	0.00975968	0.0406628	0.000759449	0.000560717	6.3794e-05	0.03085
[truncated: 49 more columns]

## Sheet: Appendix B, Table 1D
Sample no	ID	Celltype	Run	Treatment	Genotype	ID	16:1 20:5 DAG	16:0 18:0 DAG	16:0 18:1 DAG	16:1 18:0 DAG	16:0 18:2 DAG	16:1 18:1 DAG	16:0 18:3 DAG	16:1 18:2 DAG	16:0 16:0 DAG	16:1 16:1 DAG	16:0 16:1 DAG	16:1 18:3 DAG	16:1 20:4 DAG	16:0 20:5 DAG	16:1 20:2 DAG	16:0 20:3 DAG	16:1 20:1 DAG	16:0 20:2 DAG	16:1 20:0 DAG	16:0 20:1 DAG	16:0 20:0 DAG	16:1 22:6 DAG	16:1 22:5 DAG	16:0 22:5 DAG	16:0 22:4 DAG	16:0 22:3 DAG	16:0 22:2 DAG	16:0 22:1 DAG	15:0 d7-18:1 DAG I S	18:1 18:3 DAG	18:1 18:2 DAG	18:0 18:3 DAG	18:1 18:1 DAG	18:0 18:2 DAG	18:0 18:1 DAG	18:0 18:0 DAG	18:1 20:5 DAG	18:1 20:4 DAG	18:0 20:5 DAG	18:1 20:3 DAG	18:0 20:4 DAG	18:1 20:2 DAG	18:0 20:3 DAG
34	adipo1_r2_250pa1	Adipocyte	1	250µM PA	knockout	Sample 34	3509	328941	4935085	84665	1233383	4094380	59877	421315	8953435	7342417	11430883	31477	54017	4964	167027	133166	108549	319052	2686	32466	7231	20717	19113	63085	49296	108303	41022	7304	27646	23577	502455	17205	2630707	176594	111154	318648	1827	149042	2154	91221	148679	342817	201484
35	adipo1_r2_250pa2	Adipocyte	1	250µM PA	knockout	Sample 35	1931	290653	4738769	80490	1164911	3860102	46845	379015	8503219	7002583	11325509	31815	50869	6037	154619	120278	96406	267961	3661	28581	8916	23460	16962	57044	47000	102732	41386	5533	23399	21634	445727	19331	2527811	161581	114614	240826	1398	145478	2711	86269	134854	303733	163798
36	adipo1_r2_250pa3	Adipocyte	1	250µM PA	knockout	Sample 36	1882	272663	5212808	87782	1172211	4106127	51622	420782	8293139	7131044	11160015	33912	52215	5884	172722	123408	109253	291511	3757	31783	6024	26580	16059	64970	46421	111785	45081	6039	21668	26199	481126	13275	2765418	157320	102840	225504	2096	149136	2009	87516	132871	314303	162624
82	adipo2_r2_250pa1	Adipocyte	2	250µM PA	knockout	Sample 82	1312	354082	4227623	76943	1121094	3490848	54315	348814	8302598	6617524	10811263	22054	42452	6272	138412	120461	93548	291972	3734	30738	8723	18593	14182	50138	40707	93525	34146	5148	26598	22372	419220	20796	2226264	190770	87603	325146	1513	140380	2869	94796	147520	288723	191947
83	adipo2_r2_250pa2	Adipocyte	2	250µM PA	knockout	Sample 83	2576	323688	4031145	78568	1005285	3403416	46385	317859	8133671	6272610	10517036	23158	37419	3035	123473	118333	82288	284397	3228	30349	6944	15637	13993	49065	35304	82573	35126	5140	22953	21231	399570	23970	2165140	184392	89873	466187	2055	141343	2756	98210	158079	277062	243546
84	adipo2_r2_250pa3	Adipocyte	2	250µM PA	knockout	Sample 84	2978	340525	4048180	77329	996383	3132502	44962	327531	8096372	5974530	10251089	28612	38494	3512	125401	105843	87794	257211	3203	30755	7578	16391	12317	49379	33912	81652	35279	5479	20897	19748	375620	16536	2048991	144204	88853	469255	1642	119983	2142	84027	134878	241914	165253
40	adipo1_r2_500pa1	Adipocyte	1	500µM PA	knockout	Sample 40	1351	478876	5358517	88494	1282825	3928020	54642	390924	9552871	7158507	11692656	31587	53391	4857	167482	136090	106956	316165	4526	39815	8299	18280	16307	68989	45064	109846	40568	7707	32728	23305	458745	15798	2568371	180177	102765	259655	2619	147663	3733	85502	155790	317085	192025
41	adipo1_r2_500pa2	Adipocyte	1	500µM PA	knockout	Sample 41	2988	415752	5169307	88840	1224065	4019127	54300	392870	9558014	7385482	11727584	26450	46080	4056	150952	132856	106160	321242	3809	36780	9174	19707	18093	58641	40135	97496	43277	5448	21949	21219	450416	16416	2509551	175423	102227	251210	945	139045	3073	81623	137535	298340	176060
42	adipo1_r2_500pa3	Adipocyte	1	500µM PA	knockout	Sample 42	1969	428486	5365169	102116	1257989	4153256	59583	433269	9378411	7365728	11616241	30978	46641	7090	181770	144642	117824	325784	3882	36281	8653	26532	15710	60978	50146	114609	48505	8250	28803	26432	510615	17526	2893823	186808	110849	306180	2473	161490	1986	88129	169231	349041	221696
88	adipo2_r2_500pa1	Adipocyte	2	500µM PA	knockout	Sample 88	936	550308	4584982	78747	1036229	3139439	49934	275470	9418172	5534975	10616969	19170	35510	2780	107923	103221	88999	282160	3411	45402	11164	14720	12433	49291	36347	77433	35758	6411	17412	15600	334618	17468	1991544	157780	84478	360184	1346	109928	2201	72305	131331	229612	169186
89	adipo2_r2_500pa2	Adipocyte	2	500µM PA	knockout	Sample 89	1138	574771	4461876	81270	1027176	3156026	51496	291220	9550683	5916274	10635880	20803	36856	3615	110589	108622	86934	272864	1542	37321	10018	15124	14114	46228	35014	79121	37879	6462	24403	18257	342685	16187	2009297	156105	86920	361290	1560	118327	2092	83542	132595	244058	179912
90	adipo2_r2_500pa3	Adipocyte	2	500µM PA	knockout	Sample 90	1705	661477	4789145	92989	1185765	3564435	46190	328249	10012136	6518827	11081365	25282	44303	4705	127631	123822	98913	312287	3588	45068	12294	17731	14760	56280	36245	92112	39788	8226	22538	22344	397471	19652	2240714	180138	95520	398852	1806	135407	3273	78145	143144	275821	175330
28	adipo1_r2_bsa1	Adipocyte	1	BSA	knockout	Sample 28	2602	289050	5191839	81033	1313886	4080323	52946	471390	8568108	8201239	11745009	32975	56384	4238	173028	117844	109995	281754	3296	28222	6477	24702	22664	65521	43043	98574	43613	5545	28950	23681	550398	14018	2760395	157864	100339	251154	2189	143583	2407	88075	116107	338346	182068
29	adipo1_r2_bsa2	Adipocyte	1	BSA	knockout	Sample 29	1470	233760	5049182	81232	1236964	4101608	52867	425686	8690508	7756174	11830261	32478	54211	4910	162299	104459	99226	270993	2578	25895	4452	25572	18234	58620	42937	94573	38176	5668	22756	21397	475246	14161	2589493	144291	94979	212730	1960	132155	2527	74818	116263	290328	155144
30	adipo1_r2_bsa3	Adipocyte	1	BSA	knockout	Sample 30	1809	226442	4815537	78289	1129328	3838751	54387	426376	7927747	7263144	11122087	30249	52270	5886	167416	112722	106246	266483	2328	26932	5705	22127	16252	56258	46930	94703	41396	6512	25043	26641	493429	12908	2734195	130342	101044	190799	1444	124222	1779	81454	112279	304595	138257
76	adipo2_r2_bsa1	Adipocyte	2	BSA	knockout	Sample 76	1675	299354	4270204	68130	1018768	3598906	46973	359482	7568407	6296554	10771126	27694	45354	4852	141673	99367	100366	256446	2871	24297	8783	22210	14637	50121	42469	86777	35402	4765	26502	21075	440351	21308	2378967	192764	89930	376238	1253	157528	2839	103756	156706	292970	214103
77	adipo2_r2_bsa2	Adipocyte	2	BSA	knockout	Sample 77	1266	272519	4096249	62411	993279	3367892	47264	327464	7519102	6440583	10649858	23090	33849	2176	130797	99863	88796	245804	3971	24473	10366	17282	13387	43764	35154	80924	33787	4239	20297	20084	410097	18510	2144402	162097	85021	346710	936	137189	1728	89634	138406	284299	208724
78	adipo2_r2_bsa3	Adipocyte	2	BSA	knockout	Sample 78	918	252423	4087964	73980	1032613	3616646	42682	336723	7369393	6698285	10419732	26985	38280	2834	133566	99318	96029	250532	3622	25847	8006	21029	12848	48812	38688	85457	36477	5267	23049	20790	411106	17404	2262589	147122	70724	400994	1793	129298	1702	85023	130233	276538	164440
70	adipo2_r2_full1	Adipocyte	2	Full Medium	knockout	Sample 70	2747	318695	4316022	87203	1120474	3759469	48334	389587	8738208	7730504	11363656	29060	47038	4559	152579	109185	102448	271435	4313	28611	9669	23613	13179	55285	38474	100110	40209	4263	26440	23953	464762	21165	2347549	188935	91795	359300	1768	165532	3137	97983	143603	310153	197673
71	adipo2_r2_full2	Adipocyte	2	Full Medium	knockout	Sample 71	1223	323859	4108135	83048	1103880	3784404	47453	367008	8731674	7641850	11388744	25119	45477	5472	145970	104153	92678	261887	3143	24621	10365	19845	14470	55385	41139	84110	38373	4404	26647	22013	436553	18939	2196833	169882	87238	349939	2250	148327	2140	85196	127965	294009	158884
72	adipo2_r2_full3	Adipocyte	2	Full Medium	knockout	Sample 72	3778	318825	4093113	77355	1044673	3707751	45304	341702	8416813	7375254	11243424	22639	40604	3299	138886	96929	92317	249205	3174	26308	11761	17714	11644	51471	37849	90157	37025	4830	23845	22249	413249	16340	2225572	159045	78187	326542	2415	140720	2159	83016	129768	287964	167247
31	adipo1_wt_250pa1	Adipocyte	1	250µM PA	wildtype	Sample 31	1404	256295	5009853	89641	1224140	3896789	49011	393389	8728325	7366182	11532992	31255	50788	6436	153481	140017	99617	294854	3521	28601	6042	23144	18537	59971	44133	102477	41785	5746	30151	22535	463589	23165	2448754	212201	98704	197105	2498	147332	3674	82650	187209	325325	267851
32	adipo1_wt_250pa2	Adipocyte	1	250µM PA	wildtype	Sample 32	2208	300624	5043796	81332	1201993	3851322	50163	383577	8816867	6998248	11696094	27326	46985	6868	150369	128145	94078	292703	3028	29088	8128	21765	17269	60323	38277	96052	39660	5036	35395	22654	435072	16116	2527751	193063	115716	234072	2449	140351	3018	80546	156935	309835	205847
33	adipo1_wt_250pa3	Adipocyte	1	250µM PA	wildtype	Sample 33	1914	288064	4811675	82818	1169615	3833575	49393	398581	8311841	6662587	11441563	28889	49382	6398	137327	118802	105591	291310	3181	30141	6319	23680	16247	59866	43223	102549	41135		26316	19723	453142	17693	2546977	171177	103629	343509	1371	130377	2680	82470	143134	301761	198438
79	adipo2_wt_250pa1	Adipocyte	2	250µM PA	wildtype	Sample 79	1740	249740	3957385	73008	968360	3190657	44570	284238	7986543	6322683	10869670	23854	36088	4962	108299	103555	78248	266342	2939	18966	9287	17026	13237	49976	30231	76542	30108	4943	20799	18895	319194	21805	1867793	185969	75684	303338	1213	121994	2347	71040	151839	252330	174949
80	adipo2_wt_250pa2	Adipocyte	2	250µM PA	wildtype	Sample 80	1917	255073	3916852	66137	981732	3019916	40019	276495	8189609	6339765	10602308	21965	32509	3897	103407	108683	72170	249649	2566	20966	9951	15138	11218	44624	30873	73314	31542	4016	19821	16110	326058	22188	1698111	208308	74430	286109	2396	125077	3589	69397	168526	226568	182434
81	adipo2_wt_250pa3	Adipocyte	2	250µM PA	wildtype	Sample 81	873	492367	3526507	96677	1080653	2204531	82216	207506	9594688	3800956	9785192	18848	39414	8936	82676	159480	54066	275024	1274	14052	6913	14411	8166	46859	28497	61493	25198	2625	23014	13110	234230	12986	1278894	152570	83285	261550	1113	98925	2126	44682	119467	164511	117668
37	adipo1_wt_500pa1	Adipocyte	1	500µM PA	wildtype	Sample 37	1444	298882	4797627	86610	1115283	3561079	44011	332986	8394609	6672551	11018495	25394	42557	4439	130110	128151	95278	287734	3425	32951	4387	21827	13048	55203	43236	98247	40772	6992	23349	19604	388928	20198	2389658	195272	103544	250171	1854	124276	2422	83595	194420	296520	237767
38	adipo1_wt_500pa2	Adipocyte	1	500µM PA	wildtype	Sample 38	2054	318359	4992771	78298	1204564	3724902	46500	373366	8255007	7187799	11278192	26055	44721	6332	132715	124337	98260	301885	2911	28685	7575	21535	17615	61107	41123	98914	42674	5955	30060	17858	420649	22302	2419976	183169	101952	234617	887	138241	4013	81174	178720	279468	229904
39	adipo1_wt_500pa3	Adipocyte	1	500µM PA	wildtype	Sample 39	2670	328335	4709836	82583	1113809	3663379	47828	334214	8698172	6657638	11046598	27711	44020	5329	137938	118016	95759	299341	3639	33367	5247	18812	12946	55521	39988	94275	40081	6932	26236	20640	391341	15586	2384478	168784	102635	269879	1418	121153	1938	75034	156515	268282	203836
85	adipo2_wt_500pa1	Adipocyte	2	500µM PA	wildtype	Sample 85	1102	296968	3906305	70917	869361	2446534	40682	248059	8418655	5569490	10470158	17462	29531	3899	92451	102096	65201	241938	1668	22891	11339	13537	10743	39481	28387	66754	29000	5102	16930	16743	276124	22987	1586561	178814	73663	317602	796	104094	2327	62319	157184	204198	198763
86	adipo2_wt_500pa2	Adipocyte	2	500µM PA	wildtype	Sample 86	1494	338044	3949483	73207	974013	3001502	39631	287651	8369251	6451889	10973160	22426	35574	4395	104437	91022	73532	254660	2463	23853	10857	15450	9064	44142	30814	66828	33347	4857	19512	15022	300665	18224	1758745	160057	72953	406323	1520	104484	2691	58508	128296	217392	159382
87	adipo2_wt_500pa3	Adipocyte	2	500µM PA	wildtype	Sample 87	1024	345724	4162778	74803	1081686	3379366	51872	328438	8748428	6537212	11131804	22989	37631	5660	121326	109781	80471	265369	2831	23101	11552	17700	16126	50521	33974	85283	35590	5338	22795	16018	340389	17263	1923322	172287	82070	315125	1244	109288	2514	58109	129464	229562	153961
25	adipo1_wt_bsa1	Adipocyte	1	BSA	wildtype	Sample 25	3338	419013	5314706	96297	1822530	5285033	76625	1103897	10169345	9577714	12449500	48884	109888	23805	250166	162257	121968	340459	5401	29993	10179	33581	32403	103601	48154	129533	45919	6893	42819	33049	761888	22306	3087736	244762	112830	292079	4468	252203	7209	96746	202484	408931	238892
26	adipo1_wt_bsa2	Adipocyte	1	BSA	wildtype	Sample 26	3400	322074	4833787	86882	1133741	3776316	51708	393995	8294134	7206888	11368516	31200	50680	4887	152354	107921	108479	263178	3494	26762	6537	25059	17846	56307	43252	93195	37523	4997	26802	20233	459768	17812	2678769	169003	95252	397922	1577	130383	2809	81863	173302	306302	212552
27	adipo1_wt_bsa3	Adipocyte	1	BSA	wildtype	Sample 27	2608	269127	5204035	89867	1380854	4390327	52970	494398	8247072	8134243	11848122	36027	60974	6162	179167	128653	112913	298981	3799	26806	8924	27660	19311	68588	46590	108905	40674	5246	27760	23534	544043	16051	2977588	186762	108134	297565	2280	156003	3593	88163	155280	355925	185292
73	adipo2_wt_bsa1	Adipocyte	2	BSA	wildtype	Sample 73	1557	254860	3562013	75167	886660	3043020	41244	268909	7770047	6316320	10551435	18739	35049	2859	102069	88415	72587	212498	2240	21672	8941	16856	12035	44931	31936	68355	34064	3681	18199	17752	331512	20511	1937809	171478	77130	324636	1313	113704	2454	79375	138363	235497	191846
74	adipo2_wt_bsa2	Adipocyte	2	BSA	wildtype	Sample 74	3122	234960	3900999	72271	1011908	3249628	46590	331087	7845211	6931868	10927171	24719	38428	4358	117181	89770	74437	238014	2894	23496	10660	15264	14138	49312	30729	76866	30267	4645	24522	18382	361169	20935	1942270	176273	74412	309969	1846	127064	1771	75971	137764	245557	183112
75	adipo2_wt_bsa3	Adipocyte	2	BSA	wildtype	Sample 75	2758	235746	4141757	71846	1086674	3578701	47156	349207	8062288	6881150	10932392	26295	44619	3840	127387	98174	87066	244059	2110	23113	8100	20665	12721	50706	37072	84191	32236	4643	24779	16683	381789	18661	2022240	169165	83295	289136	1912	128364	1714	72093	142260	259653	176629
67	adipo2_wt_full1	Adipocyte	2	Full Medium	wildtype	Sample 67	3380	360322	4076621	86665	1841901	5128322	84128	1102563	9691540	10479435	12497980	41867	97312	17519	232396	194793	93591	331372	3358	22636	15858	26966	19241	93614	42326	123150	38816	4953	39434	26830	646123	22947	2157766	277159	108225	358937	3722	243504	5151	74624	163509	397881	183447
68	adipo2_wt_full2	Adipocyte	2	Full Medium	wildtype	Sample 68	1759	275730	3883277	78008	965566	3388132	39536	302469	8987640	7390079	11158104	24837	37860	3041	113316	89034	79597	239202	3511	19675	12923	16268	10666	43504	33829	75265	32327	2730	22536	16585	365907	19046	1743298	179481	78287	355374	1528	131178	2659	68742	144225	254797	164169
69	adipo2_wt_full3	Adipocyte	2	Full Medium	wildtype	Sample 69	1802	276624	3766759	74986	945384	3334166	35482	297024	8504572	7269102	10937408	22622	41476	2920	111276	82566	78905	215703	3049	17820	10555	16877	10547	48721	32160	75796	30766	4446	24276	16425	355721	11126	1840062	143563	83074	264925	1444	109274	1870	60782	100478	225044	126233
				Averages	WT	Full	2313.67	304225	3.90889e+06	79886.3	1.25095e+06	3.95021e+06	53048.7	567352	9.06125e+06	8.37954e+06	11531164	29775.3	58882.7	7826.67	152329	122131	84031	262092	3306	20043.7	13112	20037	13484.7	61946.3	36105	91403.7	33969.7	4043	28748.7	19946.7	455917	17706.3	1.91371e+06	200068	89862	326412	2231.33	161319	3226.67	68049.3	136071	292574	157950
					Averages	BSA	2797.17	289297	4.49288e+06	82055	1.22039e+06	3.88717e+06	52715.5	490249	8.39802e+06	7.50803e+06	1.13462e+07	30977.3	56606.3	7651.83	154721	112532	96241.7	266198	3323	25307	8890.17	23180.8	18075.7	62240.8	39622.2	93507.5	36780.5	5017.5	27480.2	21605.5	473362	19379.3	2.44107e+06	186240	91842.2	318551	2232.67	151287	3258.33	82368.5	158242	301978	198054
						250PA	1676	307027	4377678	81602.2	1.10442e+06	3.3328e+06	52562	323964	8.60465e+06	6.2484e+06	1.0988e+07	25356.2	42527.7	6249.5	122593	126447	83961.7	278314	2751.5	23635.7	7773.33	19194	14112.3	53603.2	35872.3	85404.5	34904.7	4473.2	25916	18837.8	371881	18992.2	2061380	187215	91908	270947	1840	127343	2905.67	71797.5	154518	263388	191198
						500PA	1631.33	321052	4419800	77736.3	1059786	3296127	45087.3	317452	8480687	6.51276e+06	1.09864e+07	23672.8	39005.7	5009	119830	112234	84750.2	275154	2822.83	27474.7	8492.83	18143.5	13257	50995.8	36253.7	85050.2	36910.7	5862.67	23147	17647.5	353016	19426.7	2.07712e+06	176397	89469.5	298953	1286.5	116923	2650.83	69789.8	157433	249237	197269
					R2	Full	2582.67	320460	4.17242e+06	82535.3	1.08968e+06	3.75054e+06	47030.3	366099	8.6289e+06	7582536	1.13319e+07	25606	44373	4443.33	145812	103422	95814.3	260842	3543.33	26513.3	10598.3	20390.7	13097.7	54047	39154	91459	38535.7	4499	25644	22738.3	438188	18814.7	2.25665e+06	172621	85740	345260	2144.33	151526	2478.67	88731.7	133779	297375	174601
					Averages	BSA	1623.33	262258	4.58516e+06	74179.2	1.12081e+06	3.76735e+06	49519.8	391187	7.94054e+06	7.10933e+06	1.10897e+07	28911.8	46724.7	4149.33	151463	105596	100110	262002	3111	25944.3	7298.17	22153.7	16337	53849.3	41536.8	90168	38141.8	5332.67	24432.8	22278	463438	16384.8	2.47834e+06	155747	90339.5	296438	1595.83	137329	2163.67	87126.7	128332	297846	177123
						250PA	2364.67	318425	4.53227e+06	80962.8	1.11554e+06	3.68123e+06	50667.7	369219	8.38041e+06	6.72345e+06	1.0916e+07	28504.7	45911	4950.67	146942	120248	96306.3	285351	3378.17	30778.7	7569.33	20229.7	15437.7	55613.5	42106.7	96761.7	38673.3	5773.83	23860.2	22460.2	437286	18518.8	2.39406e+06	169144	99156.2	340928	1755.17	140894	2440.17	90339.8	142814	294759	188109
						500PA	1681.17	518278	4.95483e+06	88742.7	1.16901e+06	3.66005e+06	52690.8	352000	9.57838e+06	6.64663e+06	1.12284e+07	25711.7	43796.8	4517.17	141058	124876	100964	305084	3459.67	40111.2	9933.67	18682.3	15236.2	56734.5	40491.8	95102.8	40962.5	7084	24638.8	21192.8	415758	17174.5	2.36888e+06	172738	97126.5	322895	1791.5	135310	2726.33	81541	144938	285660	185702
				T-tests	T-tests	Full x Full	0.783134	0.594419	0.0846175	0.58901	0.615305	0.751945	0.719455	0.494401	0.296672	0.492384	0.704933	0.54793	0.494836	0.526837	0.879159	0.635731	0.113009	0.973878	0.592164	0.0236015	0.202871	0.93165	0.903329	0.64654	0.408494	0.997492	0.157766	0.546956	0.59882	0.469265	0.8629	0.782088	0.0619753	0.538563	0.704348	0.590478	0.915547	0.827967	0.512589	0.0282931	0.911147	0.933127	0.462756
					WT x KO	BSA x BSA	0.00913498	0.410311	0.802178	0.163637	0.515238	0.745229	0.567766	0.459286	0.313863	0.501818	0.507132	0.661092	0.425844	0.314998	0.891704	0.578314	0.680116	0.83588	0.712686	0.658346	0.167867	0.745369	0.62417	0.396479	0.59372	0.734987	0.640278	0.571488	0.414807	0.807301	0.889041	0.0943065	0.880944	0.0667954	0.856241	0.594255	0.235217	0.530995	0.233575	0.39711	0.0384117	0.891521	0.209522
						250 x 250	0.101671	0.781648	0.655511	0.897473	0.85666	0.29836	0.778862	0.252147	0.424833	0.415674	0.842045	0.278547	0.450043	0.18026	0.124435	0.517739	0.203957	0.552802	0.116405	0.0264713	0.803139	0.677903	0.501206	0.640013	0.13811	0.226507	0.286311	0.0617904	0.461433	0.0679827	0.156325	0.836762	0.203866	0.154861	0.408307	0.17716	0.78173	0.129019	0.155494	0.0148934	0.280016	0.299304	0.899085
						500 x 500	0.902419	0.000545923	0.0588989	0.0257553	0.131945	0.207027	0.0167659	0.295447	4.26248e-06	0.736959	0.338481	0.442936	0.216828	0.502898	0.172068	0.179939	0.0526031	0.0516077	0.235421	0.000695314	0.34451	0.812153	0.224632	0.248528	0.250758	0.277502	0.1788	0.0698222	0.620694	0.0760601	0.118306	0.11859	0.191094	0.623501	0.321596	0.513937	0.13622	0.0807745	0.85972	0.0491761	0.334542	0.157842	0.492359
						WT bsa 500	0.0116334	0.31762	0.84025	0.396408	0.297128	0.163701	0.189011	0.205942	0.829128	0.0878755	0.268248	0.139926	0.158699	0.439542	0.164485	0.98214	0.288271	0.685536	0.40439	0.379937	0.788281	0.13924	0.182114	0.263805	0.410919	0.460937	0.968234	0.172531	0.288036	0.164823	0.114857	0.975669	0.200486	0.466871	0.796825	0.535038	0.0844922	0.143669	0.509883	0.0607445	0.957945	0.130255	0.964392
						R2 bsa 500	0.882892	8.68845e-05	0.183372	0.0103406	0.50706	0.630563	0.258503	0.289348	6.17318e-05	0.326046	0.674356	0.243463	0.54085	0.66608	0.490522	0.0257037	0.883646	0.00221183	0.490653	1.36154e-05	0.0357077	0.133152	0.530881	0.547285	0.731215	0.48811	0.263635	0.0114508	0.936969	0.571805	0.215606	0.595499	0.551937	0.124576	0.301096	0.561069	0.563466	0.829222	0.147669	0.251478	0.102832	0.564352	0.569619
				Fold Changes	FC	Full	1.11627	1.05336	1.06742	1.03316	0.871078	0.949454	0.886551	0.645277	0.952286	0.904887	0.982723	0.859974	0.753583	0.567717	0.957213	0.846815	1.14023	0.995231	1.07179	1.32278	0.808293	1.01765	0.971301	0.872481	1.08445	1.00061	1.13441	1.11279	0.892007	1.13996	0.961114	1.0626	1.1792	0.862811	0.95413	1.05774	0.96101	0.939298	0.768182	1.30393	0.983156	1.01641	1.10542
						Bsa	0.580349	0.906537	1.02054	0.904018	0.918397	0.969176	0.939379	0.797935	0.945526	0.946897	0.977392	0.933322	0.825432	0.542267	0.978946	0.938363	1.04019	0.984237	0.936202	1.02518	0.820926	0.955689	0.903812	0.865177	1.04832	0.964286	1.03701	1.06281	0.889108	1.03113	0.979036	0.84548	1.01527	0.836266	0.983639	0.93058	0.714766	0.90774	0.664041	1.05777	0.810987	0.986319	0.894316
						250	1.4109	1.03712	1.03531	0.992165	1.01008	1.10455	0.96396	1.13969	0.97394	1.07603	0.993447	1.12417	1.07956	0.79217	1.19862	0.950977	1.14703	1.02528	1.22775	1.30221	0.973756	1.05396	1.09391	1.0375	1.17379	1.13298	1.10797	1.29076	0.920673	1.19229	1.17588	0.975077	1.16138	0.903474	1.07886	1.25828	0.953895	1.10641	0.839796	1.25826	0.92425	1.1191	0.983843
						500	1.03055	1.61431	1.12105	1.14159	1.10306	1.11041	1.16864	1.10883	1.12943	1.02055	1.02203	1.08613	1.12283	0.90181	1.17715	1.11264	1.19132	1.10877	1.2256	1.45993	1.16965	1.0297	1.14929	1.11253	1.1169	1.1182	1.10977	1.20832	1.06445	1.2009	1.17773	0.884068	1.14046	0.979259	1.08558	1.08009	1.39254	1.15726	1.02848	1.16838	0.92063	1.14614	0.941363
						WT bsax500	0.583209	1.10977	0.983734	0.947369	0.868396	0.84795	0.855296	0.647533	1.00984	0.86744	0.96829	0.764199	0.689069	0.654614	0.774489	0.997353	0.880597	1.03365	0.849483	1.08565	0.955306	0.782694	0.733417	0.819331	0.914984	0.909554	1.00354	1.16844	0.842317	0.816806	0.745764	1.00244	0.850907	0.947147	0.974166	0.938477	0.576217	0.772854	0.813555	0.847288	0.994888	0.82535	0.996036
						R2 bsax500	1.03563	1.97622	1.08062	1.19633	1.04301	0.971517	1.06403	0.899827	1.20626	0.934917	1.01251	0.889313	0.937339	1.08865	0.931301	1.18258	1.00854	1.16443	1.11208	1.54605	1.36112	0.843307	0.932617	1.05358	0.974842	1.05473	1.07395	1.32842	1.00843	0.95129	0.897118	1.04819	0.955835	1.1091	1.07513	1.08925	1.12261	0.985297	1.26005	0.93589	1.12939	0.959085	1.04843
[truncated: 26 more columns]

## Sheet: Appendix B, Table 1E
Mouse ID	Genotype	Treatment	DG 23:1	DG 28:0	DG 28:1	DG 30:0	DG 30:1	DG 30:1|DG 14:0_16:1	DG 30:2	DG 31:0	DG 31:1	DG 32:0	DG 32:0|DG 16:0_16:0	DG 32:1	DG 32:1|DG 16:0_16:1	DG 32:2	DG 32:2|DG 16:1_16:1	DG 33:1	DG 33:2	DG 34:0	DG 34:1	DG 34:1|DG 16:0_18:1	DG 34:2	DG 34:2|DG 16:1_18:1	DG 34:2|DG 16:1_18:1	DG 36:0	DG 36:0	DG 36:0|DG 18:0_18:0	DG 36:1	DG 36:1	DG 36:2	DG 36:2|DG 18:1_18:1	DG 36:4	DG 36:5	DG 37:6	DG 37:7	DG 37:7	DG 38:4	DG 38:5	DG 38:6	DG 38:7	DG 38:7	DG 38:8	DG 39:6	DG 39:7	DG 39:8	DG 40:8	DG 41:7	DG 41:8
399	Wildtype	CTRL	0.0632381	0.0452412	0.0664991	0.317932	0.708404	0.038682	0.222696	0.0379028	0.0939917	0.907241	0.0245668	2.67759	0.212882	1.4703	0.201959	0.0699774	0.0573204	0.743663	0.902959	0.110245	0.808641	0.0316221	0.152741	0.836997	0.0281573	0.0538989	0.0368105	0.0194559	0.187118	0.0439855	0.0398445	0.0185041	0.344136	1.6916	0.808539	0.0972196	0.0598815	0.0471645	0.039537	0.132787	0.0459439	0.19566	0.464309	0.150736	0.0643692	1.05236	0.593048
416	Wildtype	CTRL	0.0634417	0.0573616	0.0761616	0.346548	0.891421	0.0432552	0.288651	0.0346372	0.0893171	1.00542	0.0282234	3.06894	0.243442	1.86757	0.263076	0.0682679	0.060896	0.791354	1.07907	0.133274	1.05477	0.0323924	0.207576	1.02743	0.0219282	0.0675903	0.0437936	0.022152	0.235118	0.0555906	0.0390205	0.0227054	0.353689	1.90837	0.892012	0.0473807	0.052425	0.0538099	0.0483851	0.119448	0.040781	0.200666	0.51305	0.160612	0.0684003	1.2617	0.64962
399	Wildtype	CTRL	0.0777266	0.0512926	0.0748395	0.316173	0.789854	0.0346126	0.241269	0.0307778	0.0773104	0.930033	0.026032	2.68882	0.208128	1.63636	0.221632	0.0738376	0.0621189	0.931473	1.16272	0.137661	1.11237	0.0348026	0.210585	1.15559	0.0326586	0.0717756	0.0563012	0.0175994	0.33985	0.0758757	0.0255401	0.0166302	0.323293	2.11224	0.70996	0.0294735	0.0386476	0.0322419	0.0298501	0.084679	0.0265112	0.195202	0.454008	0.133607	0.0572436	0.969109	0.514989
401	Wildtype	CTRL	0.0703251	0.0535904	0.0697224	0.314639	0.713765	0.0320745	0.210218	0.0367493	0.0914301	0.887859	0.0224573	2.56764	0.196244	1.40562	0.180165	0.0784642	0.0622783	0.890769	0.946201	0.109288	0.904697	0.0336814	0.16825	1.13879	0.0306334	0.0682787	0.0458792	0.0155185	0.238476	0.0541354	0.0333807	0.0193235	0.323111	2.10431	0.750412	0.090867	0.0551577	0.0430073	0.0349459	0.104822	0.0324773	0.197297	0.456356	0.140426	0.0593487	1.00354	0.50455
399	Wildtype	PA250	0.0670665	0.0472086	0.0654527	0.326303	0.798902	0.0362506	0.224447	0.0381759	0.0903669	1.04225	0.0271857	3.12517	0.242387	1.62972	0.214469	0.0775739	0.0550348	0.888404	1.09381	0.126974	0.920674	0.0348716	0.168927	1.16541	0.0301619	0.0674647	0.0505343	0.0235306	0.229619	0.0506854	0.0439155	0.0182	0.322154	1.91925	0.792422	0.100256	0.0587484	0.0548887	0.0383417	0.116476	0.0399143	0.18999	0.452559	0.137045	0.0577507	1.1733	0.564663
416	Wildtype	PA250	0.0637196	0.048955	0.0816164	0.318683	0.875275	0.047307	0.281791	0.0362974	0.0838136	1.04312	0.0327082	3.27982	0.286696	1.8238	0.2818	0.0729016	0.0548119	0.742789	1.13672	0.15456	0.938803	0.0325827	0.212418	1.00388	0.027886	0.0677054	0.0447038	0.0262984	0.218624	0.05716	0.0385524	0.0218548	0.341935	1.80555	0.895419	0.0473078	0.0501736	0.0537521	0.0436259	0.112044	0.0376804	0.198682	0.477634	0.147294	0.0606935	1.321	0.684678
408	Wildtype	PA250	0.0664438	0.0587698	0.0900519	0.364067	1.00593	0.055574	0.321133	0.0366477	0.0926897	1.0531	0.0319513	3.56825	0.29776	2.10559	0.308895	0.0887129	0.0676788	0.817886	1.3517	0.172418	1.22815	0.0338512	0.247494	1.11464	0.0271708	0.0697011	0.0623865	0.0294467	0.337638	0.0834135	0.0430583	0.0276438	0.331159	1.91347	0.833726	0.0589655	0.0585966	0.0577863	0.0503184	0.108755	0.0405967	0.184841	0.465959	0.145442	0.0626438	1.29526	0.687131
399	Wildtype	PA250	0.0743177	0.0526779	0.0685687	0.347259	0.805658	0.0364028	0.226628	0.0357002	0.0822361	1.04017	0.0265536	2.99696	0.226279	1.72475	0.224859	0.0800291	0.0660426	0.892088	1.38354	0.15897	1.21144	0.0359882	0.218698	1.16081	0.0311464	0.0699135	0.0714623	0.0219154	0.366389	0.084598	0.0261142	0.0179001	0.299793	2.02254	0.688356	0.038214	0.0395133	0.0408557	0.0346219	0.0836024	0.0282611	0.191409	0.425422	0.116594	0.0515066	1.04659	0.491756
401	Wildtype	PA250	0.0715857	0.0548265	0.0824007	0.346963	0.840021	0.0399027	0.236443	0.0380747	0.0945931	0.93808	0.0258427	3.04903	0.243515	1.56281	0.221073	0.0845482	0.0620274	0.902843	1.16403	0.143461	1.00885	0.0345108	0.190804	1.11276	0.0305869	0.0682783	0.0565884	0.0158893	0.283342	0.0654166	0.0366314	0.0195496	0.303311	2.07342	0.707624	0.0847977	0.0600903	0.052826	0.0392136	0.0964647	0.0314934	0.183353	0.444773	0.132333	0.0541444	1.01232	0.529192
399	Wildtype	PA500	0.0648127	0.0489733	0.0705238	0.348621	0.844238	0.0415605	0.248464	0.0425938	0.105267	1.14173	0.032895	3.51121	0.294263	2.01536	0.285216	0.0895785	0.0665572	0.817926	1.31617	0.168108	1.06568	0.034185	0.214707	0.980471	0.0243589	0.061646	0.0566544	0.0245389	0.268397	0.0658282	0.0432009	0.0193798	0.319825	1.83284	0.740991	0.0972649	0.0600658	0.0673032	0.042649	0.113544	0.0418628	0.170317	0.410448	0.122902	0.0553773	1.16743	0.589558
416	Wildtype	PA500	0.0803844	0.0579079	0.0799975	0.411254	0.984758	0.0457074	0.287366	0.0449043	0.108426	1.34233	0.03541	4.18031	0.321471	2.33977	0.313561	0.0867718	0.0633913	0.963957	1.455	0.165086	1.23833	0.0341201	0.231335	1.18288	0.0359386	0.0734883	0.0567711	0.0306556	0.274504	0.060263	0.0455498	0.023386	0.367333	2.13416	0.894078	0.0583833	0.0568119	0.0639676	0.049332	0.113561	0.0421335	0.214979	0.523944	0.136564	0.0605608	1.46805	0.683814
408	Wildtype	PA500	0.0720527	0.0575104	0.0941566	0.399314	1.03765	0.0495332	0.300775	0.038383	0.0977359	1.18244	0.0346228	4.04794	0.320796	2.17049	0.319507	0.0929546	0.0760821	0.832614	1.51248	0.181939	1.41299	0.0338641	0.274483	1.07781	0.0319043	0.0687046	0.0718888	0.0268941	0.372311	0.0859765	0.0515826	0.0303359	0.30623	2.01492	0.702994	0.061211	0.0702927	0.0700723	0.0526472	0.0994041	0.0382329	0.176243	0.412426	0.121842	0.0536839	1.29697	0.659603
399	Wildtype	PA500	0.0754303	0.0537676	0.0768578	0.368332	0.92829	0.0436887	0.262153	0.0398672	0.0951473	1.18794	0.0318279	3.75146	0.296263	2.15336	0.293962	0.0905137	0.0712733	0.894433	1.44632	0.168581	1.27549	0.0383435	0.238431	1.11967	0.0624478	0.0703271	0.0638309	0.0256196	0.300912	0.0714965	0.0335735	0.0224956	0.313646	2.13132	0.748663	0.0377484	0.0448633	0.0475404	0.0421291	0.0905736	0.0341025	0.169474	0.416541	0.125644	0.0528195	1.17859	0.612749
409	AdipoR2 KO	CTRL	0.0621354	0.0409915	0.054453	0.274992	0.692476	0.0315512	0.227593	0.0210735	0.0579982	0.787787	0.0205817	2.76186	0.224778	1.44474	0.202797	0.0560476	0.0429274	0.765221	1.06308	0.134104	0.931458	0.0352347	0.178015	0.913532	0.021264	0.0617933	0.0488371	0.020447	0.227679	0.0546842	0.0428245	0.0179412	0.301705	1.86241	0.863193	0.0699486	0.0673517	0.0764542	0.0355907	0.0981245	0.0364947	0.164503	0.451547	0.160036	0.062535	1.13414	0.647658
443	AdipoR2 KO	CTRL	0.0736997	0.0293563	0.042726	0.166155	0.437704	0.0228729	0.138295	0.0221701	0.0526184	0.619626	0.0157142	1.63089	0.128288	1.00761	0.143678	0.0601178	0.0517613	0.864288	0.798563	0.0998674	0.803103	0.0326173	0.157755	1.15005	0.0248581	0.0692965	0.0498127	0.0101349	0.276544	0.0673298	0.0253039	0.0183122	0.223042	2.05378	0.510631	0.0498624	0.0462557	0.0338278	0.0277068	0.0619383	0.0193404	0.114726	0.274409	0.0783178	0.0424658	0.703906	0.349758
430	AdipoR2 KO	CTRL	0.0701744	0.0292599	0.0408815	0.175568	0.438873	0.0193368	0.141616	0.0203154	0.0462421	0.663387	0.0168683	1.63109	0.119052	0.994806	0.13303	0.0455124	0.0398819	0.767932	0.664085	0.0715513	0.657455	0.0366158	0.120287	0.924462	0.0300019	0.0542094	0.0355336	0.0119241	0.185533	0.040982	0.021137	0.0131547	0.244875	1.72241	0.550097	0.0286099	0.0298921	0.0278423	0.0236384	0.0673986	0.0229286	0.124211	0.298252	0.0940226	0.0465251	0.783287	0.386032
405	AdipoR2 KO	CTRL	0.0726952	0.0438636	0.0664368	0.254399	0.723138	0.036631	0.248907	0.0224271	0.0623662	0.828772	0.023557	2.56783	0.204007	1.76901	0.257129	0.0571721	0.0483435	0.795874	0.936695	0.120456	0.974757	0.0335441	0.193827	1.11063	0.030958	0.0676245	0.0383964	0.019515	0.226499	0.0558738	0.032737	0.0178084	0.305172	1.95253	0.819601	0.0441841	0.0490814	0.0482069	0.039142	0.099243	0.0357957	0.167812	0.442772	0.158259	0.0603031	1.14877	0.64442
425	AdipoR2 KO	CTRL	0.0948962	0.0338719	0.0516918	0.201223	0.483933	0.0232956	0.174365	0.0258326	0.0651411	0.839146	0.0196854	1.83948	0.132753	1.13049	0.147642	0.0742431	0.0617923	1.08518	0.869982	0.09851	0.929211	0.0373529	0.167244	1.35596	0.0403125	0.0803748	0.0601946	0.00965306	0.34291	0.076748	0.0271203	0.0130505	0.204923	2.3901	0.492957	0.0604613	0.0426912	0.031057	0.025864	0.0704735	0.0231806	0.106201	0.267858	0.085108	0.0469456	0.630599	0.342963
409	AdipoR2 KO	PA250	0.0776084	0.0410135	0.063842	0.255155	0.670001	0.0334819	0.239893	0.0236198	0.0585287	0.81148	0.0214239	2.82722	0.21303	1.61604	0.216785	0.059353	0.0433907	0.940853	1.13424	0.128161	0.941105	0.0345016	0.173692	1.20727	0.0259241	0.0703315	0.046964	0.0211143	0.252863	0.0570677	0.0449999	0.0178841	0.278387	2.18667	0.791147	0.0817446	0.0635519	0.0826841	0.0408526	0.0878939	0.0318474	0.156895	0.444726	0.15128	0.0580665	1.21129	0.645014
443	AdipoR2 KO	PA250	0.0789254	0.0347027	0.0557766	0.204457	0.573732	0.0301527	0.192578	0.0219438	0.0551241	0.816321	0.0217271	2.37697	0.186985	1.50191	0.213148	0.0595895	0.0512709	0.998373	1.09709	0.12924	1.04252	0.0365066	0.201772	1.2121	0.0326869	0.0738658	0.0572135	0.0165776	0.33059	0.0775234	0.0323975	0.0171688	0.226825	2.25569	0.574703	0.0446296	0.0465013	0.0442227	0.0342285	0.0602907	0.0234593	0.111718	0.290696	0.0912921	0.0433573	0.873279	0.457883
430	AdipoR2 KO	PA250	0.0725578	0.0423327	0.0637579	0.241201	0.715345	0.0354514	0.25613	0.0222194	0.0571145	0.854935	0.0242688	2.89217	0.235027	1.85931	0.274918	0.0516916	0.0524247	0.817873	1.0452	0.129736	1.01421	0.0343347	0.207189	1.00536	0.0290711	0.0626318	0.0424897	0.0247919	0.248448	0.0607757	0.0329383	0.0189103	0.275111	1.95826	0.725631	0.03974	0.0494866	0.0473459	0.0399028	0.093079	0.0338076	0.150152	0.414516	0.132398	0.060071	1.10236	0.6302
405	AdipoR2 KO	PA250	0.0702961	0.0419806	0.0664625	0.257419	0.74154	0.0343414	0.256392	0.0239386	0.0689113	0.874632	0.0257892	2.96267	0.235337	1.95286	0.282398	0.0571135	0.0559974	0.794124	1.09703	0.141013	1.05749	0.0324426	0.20917	1.00978	0.0285651	0.066153	0.0459991	0.0207505	0.248639	0.0602647	0.0371495	0.0190632	0.287979	1.86211	0.75771	0.0521432	0.0537694	0.0538502	0.0431518	0.095986	0.0372978	0.147129	0.400918	0.12846	0.0591288	1.13944	0.661199
425	AdipoR2 KO	PA250	0.103724	0.033813	0.0525353	0.198128	0.484144	0.0358597	0.197302	0.0287318	0.0663693	0.816841	0.0300646	2.22314	0.228721	1.27503	0.245979	0.0750249	0.0608648	0.979578	1.08241	0.162236	1.03327	0.0372939	0.24067	1.42821	0.0470091	0.100335	0.0598371	0.0144492	0.353802	0.094156	0.027462	0.0124026	0.194917	2.39749	0.496861	0.0534086	0.0395051	0.0353494	0.0262155	0.071902	0.0249233	0.111082	0.284806	0.0911251	0.0460257	0.777952	0.406471
409	AdipoR2 KO	PA500	0.0682092	0.0348314	0.056834	0.23333	0.652125	0.0342932	0.220784	0.0203822	0.0570115	0.775683	0.0212081	2.95544	0.246107	1.62243	0.231359	0.0527841	0.043384	0.781631	1.17352	0.14513	0.995662	0.0311523	0.196498	1.00564	0.0225192	0.0614741	0.0516108	0.0210954	0.240811	0.0590439	0.0493865	0.0192537	0.240465	1.87339	0.593697	0.0801468	0.0710632	0.0900131	0.0415445	0.072729	0.0267491	0.123599	0.34367	0.107463	0.0458956	1.08012	0.591961
443	AdipoR2 KO	PA500	0.0730999	0.0396096	0.0580631	0.24825	0.692191	0.0348387	0.225118	0.0232758	0.0585465	1.01225	0.0264707	3.03746	0.237236	1.87249	0.253392	0.0596943	0.0511091	0.923087	1.29939	0.152847	1.23477	0.0371567	0.228218	1.17524	0.0316948	0.0703403	0.060881	0.0169003	0.34714	0.0794084	0.0379417	0.0180614	0.228627	2.00992	0.576864	0.0527779	0.054562	0.0549747	0.0391083	0.0591112	0.0251884	0.101092	0.285606	0.0889145	0.0415847	0.863402	0.476066
430	AdipoR2 KO	PA500	0.0802484	0.040086	0.0602709	0.268521	0.725025	0.0367334	0.255958	0.0245287	0.0638136	0.992795	0.026806	3.14106	0.259989	1.94914	0.286201	0.0586587	0.0570164	0.934389	1.22284	0.14263	1.1488	0.0357331	0.226828	1.21265	0.0325421	0.0745073	0.0521231	0.0245549	0.275649	0.0655053	0.0371933	0.018295	0.296779	2.21131	0.708872	0.0462834	0.0478221	0.0550088	0.0376799	0.083756	0.0310884	0.15546	0.404178	0.117499	0.053293	1.18975	0.655196
405	AdipoR2 KO	PA500	0.0902739	0.0375949	0.0642744	0.25681	0.655537	0.0503968	0.244273	0.0250363	0.0635184	0.9891	0.0404936	3.00492	0.32477	1.85267	0.339621	0.0546942	0.0480146	0.827563	1.23961	0.197973	1.09684	0.0320011	0.255732	1.14084	0.0421249	0.0864503	0.0537039	0.0236771	0.26411	0.0741015	0.038212	0.0144475	0.278097	1.99735	0.639627	0.0603445	0.0471141	0.0560182	0.0367812	0.0814195	0.0330819	0.139396	0.378135	0.102558	0.0518546	1.14027	0.671053
425	AdipoR2 KO	PA500	0.0903094	0.0417671	0.0589517	0.236949	0.625081	0.028966	0.211462	0.0345753	0.0801708	1.07806	0.0286941	2.86064	0.21604	1.76894	0.246297	0.0843522	0.0690548	1.12814	1.27016	0.145017	1.1572	0.0383936	0.220384	1.44492	0.037937	0.0821937	0.0675353	0.0150598	0.336512	0.0800368	0.03405	0.0138465	0.210595	2.36386	0.535627	0.0628539	0.0470244	0.0482704	0.0352633	0.0708401	0.0277922	0.108825	0.289047	0.0898888	0.0464924	0.870778	0.462705
[truncated: 324 more columns]

## Sheet: Appendix B, Table 1F
Tissue	Diet	Genotype	ID	Tissue weight for extraction (mg)	16:0 20:3 PI	16:0 20:4 PI	16:0 18:0 PI	16:0 18:1 PI	16:0 18:2 PI	16:0 16:0 PI	18:0 22:4 PI	18:0 22:5 PI	18:0 22:6 PI	16:0 22:4 PI	16:0 20:3 PC	16:0 20:4 PC	16:0 20:5 PC	16:0 18:0 PC	16:0 18:1 PC	16:0 18:2 PC	16:0 18:3 PC	16:0 16:0 PC	16:0 22:4 PC	16:0 22:5 PC	16:0 22:6 PC	16:0 20:0 PC	16:0 20:1 PC	16:0 16:1 PC	18:0 22:4 PC	18:0 22:1 PC	18:0 22:5 PC	18:0 22:6 PC	16:0 20:4 PS	16:0 18:1 PS	18:0 22:4 PS	18:0 22:5 PS	18:0 22:6 PS	18:1 22:6 PS	16:0 22:5 PS	16:0 22:6 PS	16:0 18:2 PG	16:0 18:1 PG	16:0 20:3 PE	16:0 20:4 PE	16:0 20:5 PE	16:0 18:1 PE	16:0 18:2 PE	16:0 18:3 PE	16:0 16:0 PE
scWAT	Chow	Wild-Type	S1 scWAT Chow Wild-Type	88.5	0.256737	1.66854	1.36951	0.347574	0.0663674	0.0657743	0.0112685	0.0173322	0.0130565	0.00604616	0.223924	0.874167	0.0148328	0.400773	3.66795	3.05797	0.0542942	4.30104	0.0445508	0.0701254	0.121376	0.00863413	0.0509401	1.0166	0.00952657	0.00498823	0.0222587	0.0942156	0.0380089	0.413281	0.0407731	0.0825591	0.279416	0.0749828	0.0066433	0.015521	0.0158606	0.245272	0.418577	2.98888	0.0180108	1.85587	7.74544	0.0537449	0.239938
scWAT	Chow	Wild-Type	S3 scWAT Chow Wild-Type	88	0.172391	0.765147	0.388794	0.114461	0.122457	0.16193	0.00827571	0.00513585	0.00718129	0.00334324	0.112032	0.225262	0.179525	0.613091	5.7742	1.63921	0.112826	5.77857	0.0441977	0.0731666	0.256469	0.536897	0.220859	1.37784	0.0114838	0.0333763	0.0187087	0.108487	0.0183069	0.199957	0.066072	0.0497974	0.191935	0.023301	0.00151533	0.0120696	0.0665216	0.340259	0.266525	1.04833	0.00465044	2.95121	7.66524	0.0502113	0.358691
scWAT	Chow	Wild-Type	S5 scWAT Chow Wild-Type	98.8	0.16406	1.81617	0.736361	0.200593	0.197235	0.106949	0.0223027	0.00993422	0.00131427	0.0142246	0.178038	0.494607	0.17712	0.767448	6.43784	3.50817	0.112857	7.54009	0.0616808	0.0909397	0.264943	0.422308	0.228463	1.47838	0.0130105	0.0528031	0.0475825	0.126237	0.0577131	0.269774	0.175933	0.167567	0.546988	0.0835819	0.00055024	0.0121042	0.159472	0.350174	0.379883	2.3572	0.0136793	3.46963	11.1969	0.0723259	0.363645
scWAT	Chow	Wild-Type	S7 scWAT Chow Wild-Type	83.6	0.133453	0.960724	0.615115	0.128203	0.0924578	0.184932	0.0154885	0.00600665	0.0037251	0.000934803	0.132014	0.292138	0.159605	0.570991	5.24362	1.76394	0.106311	5.31487	0.0389266	0.0730139	0.298935	0.519349	0.214492	1.21223	0.0152763	0.0391423	0.0191623	0.155218	0.0172512	0.113992	0.0322123	0.0284437	0.154817	0.00618682	0.000889568	0.00241519	0.0940937	0.350403	0.209941	1.25075	0.0092763	2.22496	6.0262	0.0418413	0.342835
scWAT	Chow	Wild-Type	S9 scWAT Chow Wild-Type	87.9	0.207948	2.05275	1.56157	0.178827	0.333347	0.181685	0.0864053	0.0354558	0.0338699	0.0295003	0.497347	1.79589	0.0978371	1.24141	10.4419	8.31092	0.192347	12.2227	0.201542	0.194518	0.480338	0.251182	0.210109	2.38939	0.0549794	0.0708464	0.0696434	0.287009	0.230924	1.02812	0.928833	0.614389	1.82829	0.131702	0.0280833	0.081913	0.61284	1.36896	0.578806	5.82086	0.0446557	5.22242	18.8613	0.290865	0.720911
scWAT	Chow	Wild-Type	S11 scWAT Chow Wild-Type	130	0.193862	1.43822	0.669863	0.130051	0.11291	0.0334584	0.0288705	0.00574065	0.0198737	0.00519619	0.258899	0.778252	0.0483457	0.41587	3.95559	3.59757	0.0728611	4.29721	0.0679365	0.0737363	0.115375	0.0865698	0.0956193	0.733119	0.0134763	0.0383274	0.023797	0.0939331	0.16325	0.14822	0.0777569	0.0649259	0.257771	0.0340791	0.00400666	0.0270109	0.139803	0.352616	0.484687	4.01105	0.0133903	2.4818	10.3385	0.0536642	0.30631
scWAT	Chow	Wild-Type	S13 scWAT Chow Wild-Type	117.2	0.132291	1.37144	1.13049	0.282875	0.257898	0.3874	0.0504056	0.0389065	0.01139	0.0111757	0.209956	0.428927	0.218374	1.36286	13.8154	4.14767	0.154933	12.6818	0	0.131655	0.586448	1.37622	0.39287	2.27289	0	0.119917	0.0966723	0.358554	0.0334959	0.401944	0.174028	0.139726	0.33808	0.0045654	0.00828605	0.0306315	0.328995	1.48207	0.448005	3.71752	0.0093058	7.68857	16.0225	0.155859	0.870053
scWAT	Chow	Wild-Type	S15 scWAT Chow Wild-Type	92.5	0.284281	2.2666	1.06931	0.234042	0.261652	0.309144	0.0166016	0.0137608	0.00047405	0.00693078	0.192427	0.576945	0.214327	0.595945	5.24395	2.52211	0.0976651	5.3972	0.0420131	0.0831239	0.239056	0.475655	0.158952	0.955221	0.0130343	0.0331448	0.0251746	0.127332	0.0568533	0.251396	0.0658254	0.111646	0.208244	0.0243911	0.00843024	0.0188032	0.0743633	0.244545	0.404877	2.78908	0.00716697	3.28584	9.17416	0.0374298	0.338969
scWAT	Chow	ADIPOR2 knockout	S2 scWAT Chow ADIPOR2 knockout	104.7	0.193343	2.45393	1.31214	0.312464	0.369265	0.237133	0.0456122	0.0157405	0.00853526	0.0224974	0.230161	0.726275	0.274646	1.40739	8.21903	4.90494	0.174939	16.74	0.136254	0.132862	0.437871	0.837206	0.362363	1.85752	0.0197885	0.0695062	0.0366899	0.175321	0.0276753	0.330256	0.117413	0.0927527	0.271056	0.0248921	0.00424344	0.016846	0.267492	0.68669	0.382479	2.80363	0.0104657	4.53025	13.3727	0.0944095	0.635628
scWAT	Chow	ADIPOR2 knockout	S4 scWAT Chow ADIPOR2 knockout	75.8	0.315553	3.0814	2.04467	0.390482	0.73181	0.132738	0.0785414	0.0353509	0.0267644	0.0581691	0.421393	1.4097	0.0626863	2.28859	10.7392	9.61777	0.174056	26.3896	0.191387	0.135247	0.269593	0.113893	0.178297	2.07481	0.0566012	0.102684	0.074567	0.236172	0.100255	0.38011	0.361576	0.294134	0.681613	0.0485855	0.00552082	0.0255616	0.681044	1.45532	0.655025	7.39687	0.057068	6.51386	24.2088	0.473171	2.33823
scWAT	Chow	ADIPOR2 knockout	S6 scWAT Chow ADIPOR2 knockout	47.2	0.289437	2.92349	2.25035	0.241009	0.383999	0.0756068	0.0229562	0.025716	0.016891	0.0199157	0.355809	1.36197	0.088228	1.8403	9.01649	6.41519	0.184161	20.2071	0.16751	0.208119	0.254878	0.0662597	0.230023	1.56264	0.0414845	0.0468525	0.044108	0.172038	0.0526329	0.152014	0.290747	0.166024	0.419295	0.0109403	0.00149651	0.0211352	0.501146	1.15336	0.45375	5.11511	0.0416648	3.83123	13.0161	0.220994	0.792249
scWAT	Chow	ADIPOR2 knockout	S8 scWAT Chow ADIPOR2 knockout	64	0.155032	1.23738	0.685475	0.210846	0.130656	0.0811474	0.00481138	0.00861936	0.00697921	0.00275475	0.164838	0.556733	0.0426786	0.880784	4.84316	3.04303	0.0713706	8.54614	0.0463285	0.0701144	0.130693	0.0726477	0.0785834	1.23534	0.0106239	0.0298422	0.0222791	0.0928734	0.0671232	0.184108	0.0954095	0.106957	0.383828	0.0512059	0.00200399	0.013987	0.120752	0.328335	0.309699	2.47239	0.0171335	2.34231	7.50963	0.0739796	0.498099
scWAT	Chow	ADIPOR2 knockout	S10 scWAT Chow ADIPOR2 knockout	75.5	0.204071	2.74603	1.44936	0.225543	0.42788	0.15009	0.0722477	0.0448608	0.0276011	0.0476508	0.449751	1.42534	0.16393	2.74731	11.3049	8.81772	0.249319	28.6206	0.188215	0.234152	0.473953	0.38832	0.362953	2.09575	0.0467448	0.0676908	0.0879515	0.305255	0.0690505	0.389376	0.252246	0.207861	0.641673	0.041799	0.0205317	0.0353084	0.795773	1.80226	0.712432	6.7579	0.0753193	5.56965	22.1949	0.491839	2.07729
scWAT	Chow	ADIPOR2 knockout	S12 scWAT Chow ADIPOR2 knockout	78.8	0.154031	1.63121	0.865483	0.11469	0.157627	0.192796	0.0346321	0.0226111	0.0158363	0.0352013	0.231465	0.643037	0.263738	1.76478	8.00058	4.67706	0.141721	19.3797	0.126599	0.162577	0.308963	0.779809	0.293346	1.70498	0.0249578	0.0533641	0.0275453	0.181538	0.0580517	0.218127	0.116464	0.0647174	0.179746	0.00746268	0.00223319	0.0108018	0.249776	0.736321	0.342978	2.62061	0.0100821	4.1159	11.8989	0.101496	0.855546
scWAT	Chow	ADIPOR2 knockout	S14 scWAT Chow ADIPOR2 knockout	85.4	0.325943	2.85372	2.22682	0.375664	0.326343	0.130188	0.154316	0.0426673	0.0517891	0.0832354	0.621643	2.40279	0.0812447	2.90398	12.8326	10.889	0.166822	32.0504	0.307269	0.227284	0.424569	0.0755058	0.230984	2.55889	0.0866266	0.0737846	0.0933505	0.349328	0.24993	0.686785	1.04836	0.645934	1.46466	0.133235	0.0295506	0.0561774	0.722415	1.88491	0.612676	6.57547	0.0587193	5.55289	16.9859	0.309916	1.69028
scWAT	Chow	ADIPOR2 knockout	S16 scWAT Chow ADIPOR2 knockout	93.5	0.194854	2.19511	0.7965	0.271417	0.112186	0.0716276	0.0383846	0.0168367	0.0137961	0.0181631	0.214231	0.793449	0.0412537	1.09457	5.32477	2.6826	0.0706674	12.2097	0.0776033	0.10547	0.161482	0.057585	0.118553	1.03563	0.0158551	0.0293301	0.0246615	0.107847	0.0767974	0.133047	0.111459	0.136573	0.336376	0.0572522	0.00299064	0.0161431	0.0961396	0.259133	0.363299	2.87619	0.0115559	2.817	7.27587	0.0508889	0.499975
eWAT	Chow	Wild-Type	S31 vWAT Chow Wild-Type	109.4	0.16896	0.804772	0.475617	0.133057	0.142013	0.0862701	0.00812444	0.000487424	0.000509257	0.00170472	0.10601	0.35677	0.125999	0.34958	2.20234	1.92306	0.0636601	3.11995	0.0318314	0.053179	0.140691	0.431096	0.113239	0.447359	0.00926838	0.0248538	0.022354	0.100683	0.0351081	0.0611524	0.00829249	0.036602	0.0928916	0.00872773	0.000975784	0.00988615	0.0660622	0.233898	0.236435	1.46641	0.00345281	1.9557	6.25549	0.0436226	0.366025
eWAT	Chow	Wild-Type	S33 vWAT Chow Wild-Type	94.1	0.290294	1.64424	0.849165	0.178179	0.197236	0.0994263	0.0106542	0.00931245	0.000194966	0.00450153	0.153686	0.358588	0.065177	0.401752	2.53438	2.18926	0.0550668	3.00417	0.0380014	0.0451884	0.114548	0.202357	0.0890656	0.50096	0.0112362	0.0237601	0.0280052	0.127196	0.0279644	0.0623283	0.0291963	0.0536857	0.21988	0.0282785	0.00265565	0.0091704	0.0979176	0.249812	0.296067	1.56624	0.0113481	1.88959	7.41524	0.0581447	0.27861
eWAT	Chow	Wild-Type	S35 vWAT Chow Wild-Type	92.1	0.166687	1.03953	0.612617	0.156627	0.0882283	0.177341	0.00300474	0.00203905	0	0.012469	0.084522	0.253313	0.101281	0.415414	2.28763	1.20736	0.0685721	3.88965	0.0315741	0.04788	0.141432	0.316818	0.147606	0.523278	0.00487369	0.0299328	0.0109435	0.0923247	0.0202033	0.0935409	0.0330574	0.0460649	0.105942	0.00779419	0.00113975	0.00962406	0.070624	0.192007	0.136453	0.807219	0.00142508	1.8006	3.87873	0.0170873	0.264932
eWAT	Chow	Wild-Type	S37 vWAT Chow Wild-Type	126.2	0.166778	1.05865	0.492396	0.13503	0.153923	0.160549	0.00688504	0.00343667	0.000856733	0.00675266	0.139824	0.403312	0.122319	0.417215	2.44698	2.26715	0.0906919	3.48566	0.0339658	0.0637057	0.207553	0.473021	0.148675	0.578721	0.0111047	0.043906	0.0239154	0.145316	0.0280263	0.0691965	0.0144494	0.0473634	0.171557	0.0118451	0.00124503	0.0167861	0.105101	0.283806	0.251224	1.84836	0.00665177	2.0354	7.39653	0.045899	0.458605
eWAT	Chow	Wild-Type	S39 vWAT Chow Wild-Type	121.6	0.195128	2.21484	1.5351	0.0967643	0.192795	0.356694	0.0241571	0.000891899	0.0258247	0.0167799	0.13597	0.343341	0.247414	0.495184	3.50659	2.76199	0.0590087	4.59011	0.0334888	0.0569191	0.281752	1.11198	0.146445	0.638889	0.0204625	0.0558927	0.0284218	0.186261	0.0225668	0.12195	0.0377396	0.0460083	0.188193	0.00917409	0.00103947	0.0103982	0.138236	0.477977	0.254638	1.60752	0.00671718	2.78914	10.0714	0.0513761	0.483532
eWAT	Chow	Wild-Type	S41 vWAT Chow Wild-Type	130.8	0.40217	1.91897	1.04603	0.271327	0.154205	0.164758	0.0255034	0.023754	0.0147526	0.0151504	0.269522	0.702507	0.0927856	0.557528	3.715	3.12465	0.0884823	5.44644	0.0678477	0.0589484	0.218179	0.39924	0.155934	0.766527	0.0110729	0.0410065	0.0241313	0.157929	0.156848	0.205627	0.0402034	0.0426736	0.155262	0.0194381	0.00255933	0.0249115	0.12923	0.442808	0.372376	2.72546	0.0165637	2.77085	7.6385	0.0522625	0.475539
eWAT	Chow	Wild-Type	S43 vWAT Chow Wild-Type	127.9	0.183404	1.33785	0.686974	0.201705	0.188723	0.36081	0.0175233	0.00157336	0.00586902	0.00975546	0.122095	0.251676	0.218243	0.493089	3.33263	2.46084	0.0815599	5.20901	0.0342913	0.0445919	0.252922	1.255	0.166646	0.704423	0.0237259	0.0460835	0.0225559	0.152108	0.0229893	0.0997206	0.0159195	0.0341105	0.106045	0.0017625	0.00198444	0.0161153	0.128485	0.410499	0.179547	0.990436	0.00167297	2.88731	7.61619	0.0494541	0.602071
eWAT	Chow	Wild-Type	S45 vWAT Chow Wild-Type	125	0.186993	1.25075	0.528426	0.16926	0.124136	0.0636478	0.00885881	0.00391222	6.49999e-05	0.0030492	0.178814	0.645563	0.0835604	0.298606	2.67937	2.71954	0.0709109	2.88575	0.0386086	0.0470533	0.147503	0.318427	0.100366	0.583491	0.00983338	0.0276099	0.0285784	0.122545	0.143822	0.136499	0.0339184	0.0535704	0.165036	0.0259848	0.00599875	0.0192077	0.110465	0.249375	0.401946	3.72011	0.0105666	2.02329	8.65573	0.0608085	0.286153
eWAT	Chow	ADIPOR2 knockout	S32 vWAT Chow ADIPOR2 knockout	93.5	0.187932	0.75052	0.3594	0.199746	0.179407	0.171306	0.00460568	0.00116682	2.20765e-05	0.00576751	0.0624648	0.262002	0.140311	0.628289	2.47164	1.91936	0.065951	5.194	0.0331809	0.0475384	0.176854	0.588246	0.133513	0.525191	0.00999138	0.0326301	0.0137137	0.0964779	0.0378789	0.113556	0.0177948	0.0231383	0.0754302	0.0108086	0.00111269	0.0137467	0.0885471	0.228355	0.132925	0.872853	0.00339696	2.40958	5.89354	0.0305784	0.50272
eWAT	Chow	ADIPOR2 knockout	S34 vWAT Chow ADIPOR2 knockout	117.4	0.304282	2.64954	1.68054	0.233857	0.260016	0.371402	0.0289979	0.0156753	0.00681678	0.0191551	0.223401	0.74147	0.17587	1.1153	4.83783	4.13758	0.118642	10.9415	0.0637201	0.0742354	0.296975	0.778682	0.183618	0.950447	0.0203049	0.0645303	0.032824	0.195916	0.117647	0.226993	0.076282	0.120848	0.318573	0.024403	0.00399152	0.0252269	0.179198	0.57921	0.341652	2.7271	0.0136723	3.24109	11.4596	0.088911	0.698142
eWAT	Chow	ADIPOR2 knockout	S36 vWAT Chow ADIPOR2 knockout	77.3	0.180873	2.47528	1.24307	0.217765	0.240217	0.099717	0.00873504	0.00380978	0.0143207	0.019426	0.177745	0.672348	0.0558096	0.776554	3.02837	3.96722	0.0737391	8.1577	0.0585688	0.084236	0.139905	0.100127	0.120358	0.731095	0.0146232	0.0682907	0.0195945	0.133663	0.0746334	0.0748922	0.042815	0.0588122	0.210521	0.0309588	0.0103432	0.0145066	0.148459	0.350629	0.209097	2.32202	0.00910633	2.05919	7.81312	0.0669246	0.382632
eWAT	Chow	ADIPOR2 knockout	S38 vWAT Chow ADIPOR2 knockout	90.3	0.208422	1.50009	0.736348	0.263084	0.423886	0.0947071	0.0100321	0	0.00255218	0.00677581	0.105267	0.433717	0.05402	0.4556	1.80738	2.18367	0.0565495	4.58897	0.028731	0.054331	0.0956036	0.195997	0.0835547	0.41826	0.00627024	0.0248065	0.0175165	0.0695091	0.0761466	0.065708	0.0341083	0.0346689	0.129988	0.0204357	0.00812658	0.0147142	0.0902195	0.191154	0.25983	2.3089	0.0127959	2.22681	7.63093	0.0707883	0.586653
eWAT	Chow	ADIPOR2 knockout	S40 vWAT Chow ADIPOR2 knockout	88.8	0.305643	3.58418	2.10125	0.377517	0.27448	0.102046	0.0398147	0.0239355	0.00422248	0.0239469	0.212798	0.780812	0.0393291	0.925487	3.61372	4.34338	0.0934299	8.98676	0.0634975	0.0822467	0.120385	0.0610825	0.128882	0.682868	0.0165125	0.0899901	0.0408799	0.10786	0.094838	0.205775	0.0721034	0.150528	0.37013	0.0620323	0.00598911	0.0319968	0.16204	0.493343	0.291004	2.50064	0.0164446	2.54643	9.63055	0.0909217	0.417291
eWAT	Chow	ADIPOR2 knockout	S42 vWAT Chow ADIPOR2 knockout	112.9	0.140092	1.22488	0.70438	0.054653	0.126104	0.306774	0.00431603	0.00618538	0.00110627	0.00947404	0.160138	0.456004	0.221824	0.922316	3.31814	3.29674	0.0868151	7.76537	0.0366866	0.0656293	0.260764	1.12137	0.158318	0.702878	0.0257044	0.0589407	0.0223149	0.184109	0.0696582	0.110252	0.0321054	0.0499132	0.180229	0.00533605	0.00582116	0.0131089	0.151487	0.427719	0.207069	1.30166	0.00790306	2.30525	7.47757	0.0546303	0.542063
eWAT	Chow	ADIPOR2 knockout	S44 vWAT Chow ADIPOR2 knockout	89.4	0.125067	1.41734	1.23395	0.143182	0.134458	0.185289	0.0034443	0.00562113	0.00756284	0.0162025	0.156801	0.457076	0.118109	1.0591	4.09522	2.96744	0.100919	10.6689	0.0578848	0.0816536	0.235066	0.362526	0.265865	0.875659	0.0174513	0.0737467	0.0320242	0.157219	0.050121	0.156441	0.0911546	0.0730182	0.235532	0.0193687	0.00071826	0.017665	0.123615	0.430883	0.244028	1.80197	0.00673398	2.82563	8.03924	0.0534234	0.646367
eWAT	Chow	ADIPOR2 knockout	S46 vWAT Chow ADIPOR2 knockout	123.6	0.378081	2.19715	1.21443	0.275169	0.269125	0.174708	0.0117133	0.0122364	0.0114632	0.0133186	0.196202	0.634471	0.105861	0.668884	2.93681	2.59803	0.0715149	6.99744	0.053523	0.0681673	0.193731	0.366575	0.124616	0.712999	0.0140009	0.0415365	0.030555	0.119613	0.152998	0.121829	0.0690743	0.0749154	0.184465	0.0308966	0.00246022	0.0230438	0.106447	0.317432	0.316462	2.93456	0.0145705	2.15007	7.11935	0.0566338	0.720921
[truncated: 121 more columns]

## Sheet: Appendix B Table 1G
Tissue	Diet	Genotype	ID	Tissue weight for extraction (mg)	16:0 20:3 PI	16:0 20:4 PI	16:0 18:0 PI	16:0 18:1 PI	16:0 18:2 PI	16:0 16:0 PI	18:0 22:4 PI	18:0 22:5 PI	18:0 22:6 PI	16:0 22:4 PI	16:0 20:3 PC	16:0 20:4 PC	16:0 20:5 PC	16:0 18:0 PC	16:0 18:1 PC	16:0 18:2 PC	16:0 18:3 PC	16:0 16:0 PC	16:0 22:4 PC	16:0 22:5 PC	16:0 22:6 PC	16:0 20:0 PC	16:0 20:1 PC	16:0 16:1 PC	18:0 22:4 PC	18:0 22:1 PC	18:0 22:5 PC	18:0 22:6 PC	16:0 20:4 PS	16:0 18:1 PS	18:0 22:4 PS	18:0 22:5 PS	18:0 22:6 PS	18:1 22:6 PS	16:0 22:5 PS	16:0 22:6 PS	16:0 18:2 PG	16:0 18:1 PG	16:0 20:3 PE	16:0 20:4 PE	16:0 20:5 PE	16:0 18:1 PE	16:0 18:2 PE	16:0 18:3 PE	16:0 16:0 PE
scWAT	High-saturated fat	Wildtype	S17 scWAT High-saturated fat Wild-Type	70.7	0.128433	0.731311	0.470796	0.0890296	0.0641157	0.000972698	0.011586	0.0122806	0.00264931	0.00443898	0.155502	0.484998	0.0203539	0.298149	2.16694	1.14757	0.0179751	1.56064	0.0247064	0.0331696	0.0475997	0.00555542	0.022074	0.490198	0.0142354	0.0163921	0.0279564	0.060943	0.0552472	0.0349767	0.0535292	0.051094	0.113101	0.0139225	0.00135253	0.00271877	0.0205558	0.126048	0.272385	2.38757	0.015454	0.688748	2.8231	0.0282419	0.135119
scWAT	High-saturated fat	Wildtype	S19 scWAT High-saturated fat Wild-Type	82.5	0.0893784	0.265796	0.301475	0.0184581	0.00929362	0.067642	0.0017507	0.00659283	0.000733057	0.000298327	0.0802469	0.129922	0.0385975	0.349117	2.04987	0.478051	0.038736	1.2259	0.0135834	0.0196125	0.0445514	0.108532	0.0668538	0.470269	0.0103782	0.0305807	0.0159916	0.086737	0.00985815	0.0327201	0.028951	0.0410477	0.0706152	0.00228111	0.00117301	0.00136202	0.00722835	0.0699555	0.146139	0.759916	0.00254789	0.774406	1.31377	0.0152787	0.223853
scWAT	High-saturated fat	Wildtype	S21 scWAT High-saturated fat Wild-Type	74	0.14312	0.764348	0.609488	0.120886	0.0349706	0.0138782	0.0253198	0.0128513	0.00630932	0.0219834	0.214216	0.549229	0.0289726	0.369883	2.71173	1.1769	0.0227609	2.11162	0.0372927	0.0344413	0.0574392	0.00784596	0.0337956	0.479826	0.02224	0.0289702	0.0323533	0.0741893	0.0710333	0.0376283	0.0960966	0.0671141	0.127908	0.00764553	0.00186168	0.00305445	0.0256115	0.138611	0.238278	2.09787	0.01304	0.84395	2.42917	0.0225064	0.150104
scWAT	High-saturated fat	Wildtype	S23 scWAT High-saturated fat Wild-Type	101.7	0.143563	0.865112	0.604562	0.0560813	0.0354764	0.0131142	0.00448235	0.00983411	0.00101981	0.0130972	0.246335	0.526956	0.0201967	0.328701	2.42008	1.33538	0.0290568	1.49987	0.0274596	0.0444003	0.0451031	0.00577435	0.0280179	0.586103	0.0110555	0.0241337	0.0240889	0.116969	0.0532462	0.0327222	0.0580531	0.0596421	0.183045	0.0140315	0.00365063	0.00418445	0.0263916	0.144341	0.425929	3.34909	0.023857	0.934064	3.30321	0.03525	0.203015
scWAT	High-saturated fat	Wildtype	S25 scWAT High-saturated fat Wild-Type	69	0.0939406	0.55783	0.331015	0.0687323	0.0400746	0.012951	0.0161473	0.00840025	0.00137635	0.00698645	0.108877	0.341694	0.0153251	0.281847	1.97065	0.920171	0.0192761	1.19921	0.0139807	0.0253522	0.0335586	0.00500589	0.0282522	0.353868	0.00675204	0.0164181	0.0191445	0.0678618	0.024511	0.0144511	0.0234788	0.0262115	0.0848301	0.00362065	2.78e-05	0.00130083	0.0145151	0.0666037	0.177464	1.57511	0.0106151	0.697741	2.15983	0.0263957	0.12715
scWAT	High-saturated fat	Wildtype	S27 scWAT High-saturated fat Wild-Type	105.1	0.138622	0.690803	0.471825	0.0646486	0.0617039	0.00734738	0.0107824	0.0177125	0.000825619	0.0151716	0.159544	0.382744	0.021856	0.377356	2.68948	1.10078	0.0281205	1.81904	0.0305967	0.0402704	0.0507618	0.0116643	0.0346522	0.531787	0.0182101	0.0261258	0.0258372	0.0921811	0.0440886	0.0302002	0.0438485	0.0645535	0.140285	0.00976197	0.00132143	0.00707134	0.0226988	0.122149	0.276017	2.25297	0.0180727	1.10103	3.04104	0.0332579	0.210255
scWAT	High-saturated fat	Wildtype	S29 scWAT High-saturated fat Wild-Type	71.1	0.112418	0.664696	0.392108	0.0330054	0.0265457	0.000796438	0.0059302	0.00554046	0.000585294	0.00171847	0.151189	0.291314	0.013908	0.290812	1.79273	1.02699	0.0272181	1.11973	0.018696	0.0325199	0.0326112	0.00844286	0.0238048	0.420109	0.00781778	0.0148922	0.0287078	0.0658031	0.0412488	0.0282116	0.0306898	0.0609063	0.140683	0.00703299	0.000411046	0.000635084	0.0160323	0.0931193	0.250675	1.6579	0.0103888	0.546222	2.16882	0.0266407	0.120172
scWAT	High-saturated fat	ADIPOR2 knockout	S18 scWAT High-saturated fat ADIPOR2 knockout	89.3	0.118101	0.742624	0.638855	0.067139	0.0253628	0.0116682	0.0117225	0.0127914	0.00192787	0.00940512	0.148835	0.456287	0.019598	0.56334	2.2429	1.0654	0.0352372	3.00063	0.0322066	0.0483197	0.0457803	0.0179709	0.0325264	0.562327	0.0154592	0.0279461	0.0360207	0.100864	0.0375909	0.0295335	0.0335031	0.0764089	0.124635	0.0162309	0.00160581	0.0030683	0.0213738	0.111906	0.2521	2.11805	0.013031	0.954928	2.45845	0.0256246	0.280174
scWAT	High-saturated fat	ADIPOR2 knockout	S20 scWAT High-saturated fat ADIPOR2 knockout	77	0.129911	0.495411	0.634584	0.0486052	0.0242701	0.00819307	0.0044482	0.00630532	0.00950415	0.00491591	0.121559	0.331269	0.0301555	0.520319	2.03231	0.870087	0.0420513	2.88937	0.0216109	0.0316797	0.0513362	0.0374389	0.0547414	0.513686	0.0124047	0.0371856	0.0312537	0.0676331	0.00926103	0.0171485	0.0346191	0.0407653	0.0680111	0.0034994	0.000566303	0.000117315	0.018011	0.100182	0.20098	1.59076	0.00772778	0.784518	1.95642	0.0244011	0.302026
scWAT	High-saturated fat	ADIPOR2 knockout	S22 scWAT High-saturated fat ADIPOR2 knockout	76.8	0.149928	0.693693	0.631262	0.0861119	0.0370002	0.0209469	0.0129806	0.0228829	0.0147919	0.00427518	0.186196	0.484857	0.0321934	0.527193	2.20307	1.24582	0.0329405	3.26156	0.0429524	0.0571707	0.0686554	0.0103532	0.034664	0.587051	0.0172368	0.0289591	0.0439263	0.0842757	0.0438571	0.0298735	0.0812366	0.0822688	0.113128	0.0130294	0.000830902	0.00490171	0.0352862	0.155807	0.315035	2.55536	0.0189789	0.944132	2.80127	0.0320446	0.315277
scWAT	High-saturated fat	ADIPOR2 knockout	S24 scWAT High-saturated fat ADIPOR2 knockout	95.4	0.127922	0.67248	0.636808	0.046914	0.0319208	0.0606466	0.0099352	0.00262113	0.000608039	0.00571718	0.151825	0.402161	0.0283937	0.575288	2.27189	1.11484	0.0404248	2.9417	0.0246217	0.0478999	0.0530635	0.0374924	0.0598003	0.645314	0.0107252	0.0363215	0.0350696	0.0836907	0.0272505	0.0327537	0.0521782	0.0484827	0.10575	0.00880611	0.000422629	0.00160376	0.0199707	0.129659	0.237952	2.05762	0.0120573	0.872076	2.62046	0.0255206	0.32875
scWAT	High-saturated fat	ADIPOR2 knockout	S26 scWAT High-saturated fat ADIPOR2 knockout	70.5	0.0960287	0.639926	0.28523	0.0251784	0.00705455	0.00226186	0.0129903	0.00293169	0.000641147	0.000862766	0.14766	0.40074	0.0200936	0.506091	1.91807	0.922013	0.0235773	2.50497	0.0217671	0.0327774	0.0493001	0.00574577	0.0299317	0.448518	0.00972057	0.0197417	0.0378632	0.0805248	0.0155334	0.0247738	0.0325004	0.0490265	0.158453	0.00580139	2.59765e-05	0.000944918	0.0156187	0.0929597	0.293094	2.33171	0.0187721	0.849491	2.57928	0.0386922	0.261538
scWAT	High-saturated fat	ADIPOR2 knockout	S28 scWAT High-saturated fat ADIPOR2 knockout	98.3	0.131528	1.16453	0.97734	0.103178	0.0628741	0.0281875	0.00965023	0.0085697	0.00211577	0.0092789	0.186529	0.49594	0.029203	0.76008	2.92321	1.30094	0.0407813	3.99025	0.0348886	0.0437203	0.0437918	0.0112951	0.049404	0.724356	0.0146844	0.0229778	0.0262242	0.100138	0.0388424	0.0560634	0.0472533	0.11186	0.213759	0.021905	0.00211446	0.00154837	0.022498	0.118366	0.305577	2.51972	0.0178534	1.18348	3.09319	0.0422538	0.412948
scWAT	High-saturated fat	ADIPOR2 knockout	S30 scWAT High-saturated fat ADIPOR2 knockout	90	0.091801	0.532855	0.883661	0.074554	0.0202898	0.0396886	0.00690529	0.0162742	0.0169499	0.00955722	0.160707	0.545231	0.0346028	0.729494	3.26209	1.136	0.0633579	5.04236	0.0419748	0.057494	0.0867912	0.071591	0.095015	0.852784	0.0121862	0.0335161	0.0337143	0.063197	0.0301327	0.107104	0.0592727	0.106011	0.152938	0.006199	0.00529361	0.00378746	0.0302174	0.212936	0.270585	2.29691	0.019085	1.40151	2.745	0.0308556	0.502923
eWAT	High-saturated fat	Wildtype	S47 vWAT High-saturated fat Wild-Type	107.4	0.149747	0.884758	0.411371	0.0829664	0.0548184	0.00889717	0.0165974	0.0225473	0.00458296	0.0188676	0.269845	0.752558	0.0350483	0.465211	3.27141	2.01165	0.0556854	2.52422	0.0503445	0.0621947	0.091643	0.0222346	0.0543227	0.793721	0.0221799	0.0360422	0.0396959	0.0938054	0.131864	0.112537	0.0633637	0.0870324	0.126017	0.00790315	0.000346854	0.0115722	0.0505153	0.226452	0.370197	3.45265	0.0254567	1.03026	4.2258	0.0332483	0.262766
eWAT	High-saturated fat	Wildtype	S49 vWAT High-saturated fat Wild-Type	111.8	0.121303	0.497955	0.320157	0.0334995	0.0597848	0.0586584	0.0111124	0.00598254	0.000102383	0.00345144	0.168424	0.31175	0.0438522	0.358686	2.68491	1.32524	0.0531328	1.59204	0.0184424	0.0335593	0.0616239	0.0926724	0.0744807	0.708414	0.0138276	0.0293538	0.0288568	0.0875916	0.0264268	0.0475939	0.0176241	0.0409861	0.0586366	0.000388835	0.000185865	0.000277309	0.0224313	0.165336	0.329469	2.30029	0.0163357	0.952999	3.14792	0.0349352	0.311614
eWAT	High-saturated fat	Wildtype	S51 vWAT High-saturated fat Wild-Type	97.7	0.175727	1.43708	0.961565	0.0579673	0.0690313	0.071292	0.0223169	0.0147618	0.0050736	0.000374375	0.259354	0.705598	0.0286186	0.426407	2.96331	1.68226	0.0463323	2.00155	0.0408103	0.0531262	0.0577443	0.00512762	0.0461126	0.677096	0.013166	0.00964268	0.0386922	0.0851886	0.114594	0.0876091	0.0505847	0.0401957	0.0465238	0.000269025	0.000511113	0.00297569	0.0475431	0.228571	0.344284	3.42982	0.0220073	1.00939	3.7511	0.0365984	0.191296
eWAT	High-saturated fat	Wildtype	S53 vWAT High-saturated fat Wild-Type	107	0.0971005	0.327086	0.362737	0.0516244	0.0200607	0.196134	0.00795664	0.00148683	0.000923102	0	0.0959536	0.160596	0.0890992	0.431231	2.93452	0.757334	0.0625216	1.97225	0.014512	0.037543	0.118765	0.287975	0.119457	0.701114	0.0109971	0.0512299	0.0236181	0.113432	0.0230615	0.0608879	0.0168751	0.0208517	0.0318197	0.000578912	0.00064982	0.00538127	0.020771	0.191297	0.186335	0.973357	0.0052583	1.02107	2.25886	0.0159451	0.390724
eWAT	High-saturated fat	Wildtype	S55 vWAT High-saturated fat Wild-Type	100.3	0.119991	0.499808	0.509149	0.0545279	0.0552667	0.0556019	0.0163686	0.0106904	0.00104519	0.00649278	0.112781	0.25158	0.040928	0.273247	1.84566	0.951891	0.0421864	1.24599	0.0179757	0.023929	0.0654202	0.0815076	0.0521023	0.432803	0.0131206	0.0327227	0.0250682	0.0794885	0.0254539	0.0207878	0.0133513	0.0457862	0.0740795	0.000399059	0.0001528	0.00234441	0.0234705	0.118375	0.212962	1.79043	0.0137468	0.637198	2.48214	0.0268206	0.185635
eWAT	High-saturated fat	Wildtype	S57 vWAT High-saturated fat Wild-Type	104.6	0.122264	0.637986	0.430038	0.0794771	0.0383256	0.0026268	0.0128992	0.0134997	0.000211112	0	0.152416	0.330999	0.0139897	0.295315	2.08895	1.32735	0.0288675	1.24961	0.0193047	0.0252954	0.0319929	0.00815043	0.0252216	0.4932	0.00684566	0.016889	0.0296974	0.0707226	0.0462367	0.0147488	0.0298633	0.0806889	0.174857	0.00689175	0.00315099	0.000844958	0.0265797	0.103448	0.326241	2.77455	0.0242951	0.940729	4.17077	0.0576429	0.202278
eWAT	High-saturated fat	Wildtype	S59 vWAT High-saturated fat Wild-Type	89	0.0838936	0.450185	0.483346	0.0263502	0.0267747	0.0560734	0.00425418	0.00369192	0.00032984	0.00105981	0.11911	0.237125	0.0525265	0.29449	2.17473	0.844473	0.046466	1.32183	0.0150681	0.0238028	0.078638	0.115527	0.0634325	0.514191	0.00770739	0.0315169	0.0239773	0.0824206	0.0181545	0.041861	0.0226015	0.0528543	0.0770201	0.00246035	0.00164349	0.00264522	0.021291	0.140862	0.2255	1.3294	0.00527041	0.80269	2.33047	0.0183202	0.195176
eWAT	High-saturated fat	ADIPOR2 knockout	S48 vWAT High-saturated fat ADIPOR2 knockout	117.8	0.20859	0.536402	0.757061	0.112552	0.0731774	0.214752	0.00534664	0.00322649	0.000356463	0	0.0757	0.134006	0.0776666	0.57012	2.49663	0.793078	0.0504983	2.89358	0.0170978	0.0352716	0.0966798	0.237416	0.0731262	0.597163	0.00718369	0.0323672	0.0121571	0.0829204	0.0226085	0.0671886	0.0238587	0.0293141	0.0654806	0.000663644	0.00249423	0.00206185	0.0208821	0.150683	0.19134	0.90482	0.00262376	1.38152	2.65305	0.0190415	0.461336
eWAT	High-saturated fat	ADIPOR2 knockout	S50 vWAT High-saturated fat ADIPOR2 knockout	106.1	0.240027	0.381749	0.565429	0.172494	0.0700013	0.141452	0.011127	0.0255691	0.000730637	0.000273217	0.0764214	0.131005	0.066636	0.618856	2.2811	0.79529	0.0527706	2.84081	0.0168962	0.0313749	0.0859272	0.172418	0.0990898	0.531203	0.013729	0.0308778	0.0143098	0.0858822	0.0506295	0.108918	0.028474	0.0219457	0.0543704	0.000644508	0	0.00316145	0.0237461	0.158934	0.218764	1.15763	0.00643729	1.28057	2.8726	0.0343863	0.579116
eWAT	High-saturated fat	ADIPOR2 knockout	S52 vWAT High-saturated fat ADIPOR2 knockout	86.1	0.245081	0.752151	0.731631	0.184208	0.0751985	0.0461146	0.00405094	0.0105077	0.0044092	0.00250432	0.152782	0.430448	0.0213999	0.391218	1.88126	1.40517	0.0381888	2.27723	0.0262881	0.0410502	0.0389806	0.0144997	0.0345369	0.472623	0.0109784	0.0218789	0.0260377	0.0583099	0.19849	0.0244247	0.0316713	0.0531247	0.107032	0.0114553	0.00475923	0.0174486	0.0329003	0.142125	0.299583	2.58134	0.0175622	1.06902	3.92509	0.0488683	0.338803
eWAT	High-saturated fat	ADIPOR2 knockout	S54 vWAT High-saturated fat ADIPOR2 knockout	111.6	0.0832618	0.419803	0.628282	0.134195	0.0598283	0.268148	0.000181949	0.000302814	0	3.09833e-05	0.0563252	0.110506	0.0804713	0.674765	2.40592	0.63891	0.0735797	2.96052	0.0184723	0.044348	0.129574	0.315791	0.0914766	0.579575	0.00943794	0.0551659	0.0323084	0.136623	0.011663	0.042881	0.0120561	0.0216537	0.0402544	0.00107094	0.000702389	0.00459436	0.0169848	0.130328	0.121137	0.611076	0.00240255	1.14676	1.94736	0.0180801	0.438814
eWAT	High-saturated fat	ADIPOR2 knockout	S56 vWAT High-saturated fat ADIPOR2 knockout	83.5	0.121214	0.352642	0.588629	0.0675403	0.0732604	0.119716	0.00776669	0.00590312	0	0.000989626	0.0734998	0.13995	0.0496069	0.442958	1.82392	0.700546	0.0631233	2.01467	0.0100264	0.0305386	0.0691341	0.117593	0.0906577	0.423277	0	0.0409049	0.0230851	0.083165	0.031715	0.0525184	0.0166599	0.0354158	0.0601636	0.000230992	0.000152709	0.00215854	0.0137544	0.133467	0.18514	1.08567	0.00607664	0.984964	2.28966	0.0270866	0.347291
eWAT	High-saturated fat	ADIPOR2 knockout	S58 vWAT High-saturated fat ADIPOR2 knockout	118.2	0.102335	0.40388	0.440131	0.0591525	0.0409159	0.115758	0.00134194	0.00457266	0	0.000194413	0.0757685	0.153096	0.0615744	0.574368	2.58616	0.591766	0.0559646	2.95949	0.0144627	0.0397369	0.0799987	0.199325	0.0875206	0.663641	0.0109221	0.0475717	0.015712	0.0951295	0.0102239	0.0846821	0.0136157	0.0175179	0.0531738	6.34412e-05	0.000132587	0.00353885	0.0154573	0.126627	0.142974	0.873344	0.00174402	0.969053	1.57047	0.0131038	0.388832
eWAT	High-saturated fat	ADIPOR2 knockout	S60 vWAT High-saturated fat ADIPOR2 knockout	87.7	0.0988916	0.435997	0.166238	0.0533611	0.0363901	0.0108098	0.00631892	0.00530819	0.000589039	0.000689477	0.111064	0.300283	0.0250062	0.353018	1.65691	1.05627	0.0350251	1.95171	0.0219154	0.0315802	0.0259758	0.0081947	0.0363457	0.388381	0.00596862	0.0160693	0.0245165	0.0573943	0.0777269	0.0112957	0.0136568	0.0416893	0.0853613	0.00208662	0.000764326	0.000648321	0.0246988	0.0958647	0.261629	2.2082	0.0175991	0.837448	3.06015	0.0357376	0.302539
[truncated: 121 more columns]

## Sheet: Appendix B Table 1H
ID	ID	Repeat	Treatment	Genotype	PC 16:0 18:0	PC 16:0 18:1	PC 16:0 18:2	PC 16:0 18:3	PC 16:0 16:0	PC 16:0 16:1	PC 18:2 20:5	PC 18:0 18:0	PC 18:0 18:1	PC 18:1 18:1	PC 18:1 18:2	PC 18:2 18:2	PC 16:0 20:5	PC 16:0 22:0	PC 16:0 22:1	PC 18:1 20:1	PC 18:0 20:3	PC 16:0 22:4	PC 18:0 20:5	PC 16:0 22:6	PC 18:0 22:1	PC 18:1 22:1	PC 18:1 22:2	PC 18:1 22:3	PC 18:0 22:5	PC 18:0 22:6	PC 18:1 22:6	PC 18:2 22:6	PE 16:0 18:0	PE 16:0 18:1	PE 16:0 18:2	PE 16:0 18:3	PE 16:0 16:0	PE 16:0 16:1	PE 16:0 20:0	PE 16:0 20:1	PE 16:0 20:2	PE 16:0 20:3	PE 16:0 20:4	PE 16:0 20:5	PE 16:0 22:0	PE 16:0 22:1	PE 16:0 22:2	PE 16:0 22:3	PE 16:0 22:4
Sample 10	adipo1_adipoq_r2_adipoq1	1	Adiponectin	knockout	3.4546	25.2441	11.0512	1.09968	11.8836	26.3797	0.0914161	0.426287	2.87389	8.64578	2.56545	1.36508	0.393406	0.0479272	0.0483316	0.386278	0.862619	1.18263	0.802533	0.229694	0.0429667	0.047464	0.0968578	0.201429	0.226466	0.184307	0.130132	0.0361276	1.21323	36.3287	5.05107	0.702153	3.40649	33.0979	0.0301216	0.675403	1.61251	7.25567	5.84028	0.0596678	0.00158841	0.0500575	0.148125	0.671664	0.785427
Sample 11	adipo1_adipoq_r2_adipoq2	1	Adiponectin	knockout	3.43011	26.1432	11.0761	1.01675	11.4714	26.3792	0.086062	0.506863	2.80042	8.48754	2.59862	1.31957	0.379626	0.0481324	0.053893	0.361501	0.771584	1.11839	0.806209	0.215235	0.0404253	0.0501673	0.0976971	0.193013	0.216492	0.165077	0.129417	0.0373811	1.19633	36.3412	4.91858	0.699655	3.50479	34.1081	0.031466	0.677682	1.56529	7.03896	5.54322	0.063098	0.00148243	0.0407469	0.145588	0.586999	0.663729
Sample 12	adipo1_adipoq_r2_adipoq3	1	Adiponectin	knockout	3.43082	25.8637	10.9226	1.06068	11.6819	26.8295	0.0879824	0.325267	2.84758	8.25821	2.61745	1.31723	0.375476	0.0484428	0.0411753	0.402027	0.815428	1.12934	0.786663	0.218365	0.0376882	0.0481486	0.105125	0.187974	0.216323	0.174268	0.133311	0.0372632	1.21105	35.037	5.24805	0.725893	3.85872	33.2925	0.0256033	0.71963	1.69955	7.75354	5.92695	0.0569648	0.00206926	0.0489829	0.147516	0.591552	0.824772
Sample 34	adipo1_adipoq_r2_adipoq1	2	Adiponectin	knockout	3.89179	26.2527	11.3839	0.953695	12.717	23.3693	0.0787208	0.497822	2.79756	9.22211	2.69475	1.42214	0.345658	0.0292796	0.0473909	0.410737	0.843217	1.16863	0.817688	0.207565	0.0249949	0.0319724	0.0923186	0.186357	0.218846	0.171559	0.106422	0.0159254	1.24931	37.9555	4.61906	0.559048	3.7383	32.8967	0.0240401	0.690226	1.40732	6.71363	5.7521	0.060242	0.00242376	0.0433702	0.127021	0.529435	0.802286
Sample 35	adipo1_adipoq_r2_adipoq2	2	Adiponectin	knockout	3.7519	26.1484	11.3939	0.974966	12.7364	23.4736	0.0782045	0.486563	2.83812	9.24771	2.72006	1.36816	0.352682	0.0299555	0.0493643	0.422338	0.835635	1.19608	0.824147	0.208585	0.0257693	0.032863	0.0900553	0.18496	0.22035	0.175593	0.117593	0.0159581	1.19887	37.7884	4.01592	0.586038	3.8359	33.3673	0.0288415	0.68878	1.60983	6.60363	5.80475	0.0556809	0.00135976	0.0409005	0.129922	0.527227	0.79645
Sample 36	adipo1_adipoq_r2_adipoq3	2	Adiponectin	knockout	3.90251	26.5198	11.599	0.994047	12.9063	21.9878	0.0797812	0.487992	2.88459	9.51305	2.76991	1.41796	0.36095	0.0299425	0.0524426	0.424539	0.862233	1.23298	0.855207	0.218252	0.0294878	0.0329268	0.0969845	0.191849	0.230858	0.181166	0.122439	0.0150927	1.29571	37.6925	4.77689	0.540094	3.64618	32.0009	0.0271082	0.755484	1.68076	6.99765	5.98567	0.0689418	0.00427036	0.0403691	0.144232	0.556779	0.81244
Sample 7	adipo1_adipoq_wt_adipoq1	1	Adiponectin	wildtype	3.27286	29.7473	12.0328	1.25796	10.5845	32.8191	0.102822	0.362327	2.90403	0.514582	0.208662	1.54455	0.482612	0.0563344	0.0657021	0.410309	0.772066	1.31874	0.131889	0.26925	0.0475636	0.0552101	0.11407	0.244097	0.25691	0.223278	0.156363	0.0440639	1.06465	33.7627	4.76884	0.583332	2.63267	39.631	0.02048	0.476271	1.3654	5.69225	5.1666	0.064541	0.000786312	0.0346738	0.151929	0.572326	0.870106
Sample 8	adipo1_adipoq_wt_adipoq2	1	Adiponectin	wildtype	3.15366	26.8966	10.8799	1.10133	8.62809	29.5672	0.0834352	0.468209	2.60796	7.94931	2.5916	1.35849	0.383733	0.0469526	0.0541206	0.383367	0.777856	1.14841	0.779993	0.216709	0.0377651	0.0425922	0.0997664	0.186847	0.227854	0.17695	0.117959	0.0333505	1.08741	33.4612	4.23855	0.610217	2.56228	39.6361	0.0188114	0.473285	1.36065	6.78272	5.12471	0.0652786	0.00400538	0.0223145	0.134597	0.602774	0.844969
Sample 9	adipo1_adipoq_wt_adipoq3	1	Adiponectin	wildtype	3.15443	27.5048	11.1875	1.0607	8.84111	27.8387	0.0854584	0.480984	2.67188	8.41507	2.5744	1.42843	0.378333	0.0460262	0.0420896	0.383264	0.825832	1.17507	0.77658	0.219923	0.0413617	0.0425462	0.103906	0.186043	0.215922	0.163934	0.120297	0.0353298	1.01116	33.4731	4.80801	0.566825	2.28773	39.2799	0.0231268	0.477296	1.39289	6.77369	5.16369	0.0631484	0.00203739	0.0318391	0.153995	0.572477	0.814758
Sample 31	adipo1_adipoq_wt_adipoq1	2	Adiponectin	wildtype	3.58454	25.7713	11.829	1.01504	9.63789	26.6707	0.0835554	0.479637	2.96083	9.10009	2.65676	1.47712	0.367125	0.0408494	0.00807617	0.396551	0.82858	1.18143	0.845021	0.213463	0.0209852	0.0327858	0.0867888	0.187404	0.229257	0.172978	0.108329	0.0138252	1.09688	33.919	4.64797	0.622937	2.58653	38.9912	0.0192729	0.467112	1.24533	6.37508	5.37202	0.0656333	0.00178095	0.0280933	0.125603	0.552916	0.877109
Sample 32	adipo1_adipoq_wt_adipoq2	2	Adiponectin	wildtype	3.66005	25.3239	12.1581	1.09195	9.34485	24.8866	0.0713435	0.510069	3.24862	9.74819	2.95882	1.59168	0.394344	0.0459484	0.0643843	0.468061	0.955416	1.3545	0.919524	0.231709	0.0238402	0.0397089	0.100849	0.208126	0.25297	0.200458	0.130734	0.0152562	1.09607	34.4505	4.11595	0.623177	2.28933	38.4007	0.019911	0.489228	1.29204	6.8019	5.53502	0.0627225	0.00147941	0.0331935	0.117759	0.551238	0.89257
Sample 33	adipo1_adipoq_wt_adipoq3	2	Adiponectin	wildtype	3.49155	25.8611	11.7981	0.995973	9.49762	26.9417	0.0783158	0.500395	2.92064	8.87854	2.76795	1.47441	0.368334	0.0349215	0.0545478	0.404526	0.831471	1.22509	0.817627	0.213618	0.0228477	0.028043	0.0903473	0.184128	0.223157	0.169833	0.109514	0.0156533	1.08024	34.7591	4.82089	0.642644	2.55361	36.935	0.0182965	0.45298	1.37546	7.15544	5.6185	0.0648751	0.0019767	0.0261703	0.127061	0.598089	0.735894
Sample 4	adipo1_adipoq_r2_bsa1	1	BSA	knockout	3.4793	26.6866	11.6206	1.14873	11.697	22.9424	0.0767037	0.32011	2.85737	9.37016	2.90141	1.44363	0.419641	0.0497123	0.0573341	0.442563	0.94685	1.30865	0.903971	0.232892	0.0374525	0.0473231	0.122459	0.22195	0.260472	0.212693	0.152306	0.0397074	1.21031	36.2248	4.92404	0.658046	3.49151	33.7252	0.030364	0.680342	1.64519	7.26829	5.67694	0.0543285	0.00339902	0.0427871	0.148967	0.591508	0.671693
Sample 5	adipo1_adipoq_r2_bsa2	1	BSA	knockout	3.40318	26.0114	11.5012	1.13624	11.5686	24.0612	0.0745033	0.488543	2.7621	9.21433	2.84608	1.45847	0.410784	0.0509407	0.0621078	0.455068	0.969294	1.3025	0.913733	0.24002	0.0360834	0.0474301	0.114504	0.223584	0.252834	0.208698	0.149844	0.0367539	1.26165	34.6104	5.18429	0.666989	3.81226	34.4918	0.0240504	0.682424	1.66918	7.20639	5.72535	0.0694823	0.00335832	0.0443146	0.140475	0.62499	0.687271
Sample 6	adipo1_adipoq_r2_bsa3	1	BSA	knockout	3.46497	26.1432	11.4004	1.11743	11.6695	23.8652	0.0750243	0.474013	2.87225	9.21356	2.88459	1.42601	0.406888	0.0489404	0.0669703	0.441413	0.958255	1.27637	0.888388	0.240187	0.0397625	0.0514617	0.114357	0.217962	0.248532	0.205147	0.14854	0.0405784	1.18638	36.6052	5.10451	0.694486	3.77377	32.5888	0.0297542	0.710285	1.64909	7.39081	5.7131	0.057804	0.00248976	0.039434	0.136107	0.637391	0.797691
Sample 28	adipo1_adipoq_r2_bsa1	2	BSA	knockout	3.88405	26.2543	11.2968	0.959224	12.5217	22.9143	0.0815006	0.481977	2.94348	9.36314	2.79362	1.45684	0.367291	0.0329089	0.0483602	0.412283	0.875663	1.26507	0.891555	0.220154	0.0254732	0.0349763	0.0943622	0.205387	0.249685	0.190969	0.117569	0.0172681	1.39793	36.6855	4.96214	0.636298	4.03103	31.2419	0.0364473	0.807305	1.71315	7.00089	6.43347	0.0571462	0.00386412	0.054115	0.144854	0.611622	0.892753
Sample 29	adipo1_adipoq_r2_bsa2	2	BSA	knockout	3.86695	26.3957	11.3558	0.965561	12.8111	23.0412	0.0859059	0.570393	2.89426	9.12261	2.6802	1.41992	0.339076	0.0309942	0.0479951	0.376778	0.845042	1.20125	0.862642	0.205443	0.024709	0.0302881	0.0919369	0.190483	0.226216	0.180622	0.119202	0.0176166	1.28138	38.6471	4.7323	0.60831	3.50983	31.3883	0.0269682	0.722721	1.61582	6.79722	5.94192	0.064516	0.00359206	0.0476715	0.133235	0.598813	0.808888
Sample 30	adipo1_adipoq_r2_bsa3	2	BSA	knockout	3.87714	26.0799	11.4141	0.954406	12.8577	22.9197	0.0830462	0.523408	3.00263	9.161	2.7419	1.40894	0.352514	0.0366937	0.0511486	0.428691	0.868326	1.24605	0.883315	0.213489	0.0256954	0.0308836	0.089186	0.193537	0.228024	0.183008	0.12577	0.0198586	1.27414	38.9192	4.91025	0.601772	3.51521	30.4189	0.0339615	0.741109	1.64121	7.26351	6.1207	0.0570691	0.00365438	0.0431711	0.13394	0.647602	0.759907
Sample 1	adipo1_adipoq_wt_bsa1	1	BSA	wildtype	3.25906	25.8757	11.9775	1.18045	8.77373	24.6296	0.0679325	0.536312	3.47641	9.6849	3.02362	1.58479	0.437154	0.0766516	0.063695	0.511649	1.05075	1.38434	0.925748	0.266051	0.049873	0.0655006	0.127608	0.249414	0.278242	0.225375	0.162621	0.0553743	1.09989	32.4929	4.89071	0.682179	2.47034	39.4205	0.0179053	0.464736	1.2876	7.06384	5.39147	0.0711489	0.00430891	0.0337311	0.151707	0.579907	0.847763
Sample 2	adipo1_adipoq_wt_bsa2	1	BSA	wildtype	3.25539	26.4057	11.4493	1.15644	8.70685	26.9735	0.0779074	0.502901	2.93312	8.7935	2.84124	1.50366	0.418626	0.0539017	0.0562728	0.431309	0.929307	1.31262	0.887602	0.248021	0.0390505	0.0459002	0.118044	0.219979	0.255548	0.203754	0.141143	0.0395176	0.972229	32.307	4.72382	0.588315	2.26385	40.9757	0.0198783	0.456227	1.19396	6.56223	5.18445	0.0678534	0.00259296	0.0291301	0.143336	0.604046	0.82641
Sample 3	adipo1_adipoq_wt_bsa3	1	BSA	wildtype	3.28154	26.2667	11.5312	1.15853	8.8099	27.0159	0.0755368	0.515389	2.91728	8.81033	2.8144	1.51361	0.407868	0.0566852	0.0357061	0.418138	0.942777	1.28413	0.871486	0.239736	0.0395873	0.0462329	0.113497	0.217827	0.245619	0.192166	0.139794	0.0384335	1.00973	33.7227	4.82364	0.677951	2.52022	38.4452	0.0246455	0.444383	1.39987	7.05647	5.20128	0.0567553	0.00379802	0.0280695	0.138382	0.655783	0.85709
Sample 25	adipo1_adipoq_wt_bsa1	2	BSA	wildtype	3.31781	27.6469	10.8813	0.958763	8.70055	27.9899	0.0815245	0.300841	2.7041	8.5075	2.59236	1.38029	0.380059	0.0519317	0.0474449	0.378762	0.836298	1.2051	0.843602	0.23274	0.033929	0.0360523	0.0974645	0.199742	0.241065	0.191935	0.128457	0.0335877	1.1506	33.7496	4.90716	0.646369	2.39085	37.3334	0.0241671	0.525551	1.4292	6.78403	5.85083	0.0617905	0.00226066	0.0339927	0.151016	0.525926	0.942136
Sample 26	adipo1_adipoq_wt_bsa2	2	BSA	wildtype	3.23648	27.5304	10.9727	1.03235	8.56505	28.3359	0.0811127	0.46002	2.59416	8.52374	2.57022	1.41638	0.374748	0.0461972	0.0471639	0.357891	0.790581	1.1477	0.805505	0.211766	0.0338379	0.0386406	0.0945526	0.18331	0.228867	0.176365	0.112464	0.0319172	1.06246	35.2716	4.77729	0.618541	2.5008	36.8186	0.0238657	0.474468	1.22454	6.74196	5.47571	0.0623627	0.00102684	0.0323885	0.133348	0.589061	0.930567
Sample 27	adipo1_adipoq_wt_bsa3	2	BSA	wildtype	3.26462	27.5161	10.8911	1.00172	8.49663	28.1647	0.0793235	0.468856	2.79085	8.5211	2.54095	1.42745	0.378302	0.0454002	0.0501239	0.369893	0.838826	1.18818	0.823253	0.225457	0.0358879	0.0390699	0.0935447	0.190986	0.230583	0.178948	0.12024	0.0279359	1.08959	35.3146	4.79635	0.628081	2.22334	36.4881	0.0224574	0.473618	1.39189	6.91584	5.75145	0.0548076	0.00159907	0.0292314	0.138598	0.577828	0.85955
[truncated: 10 more columns]

## Sheet: Appendix B Table 1I
ID	ID	Repeat	Treatment	Genotype	PC 16:0 18:0	PC 16:0 18:1	PC 16:0 18:2	PC 16:0 18:3	PC 16:0 16:0	PC 16:0 16:1	PC 18:2 20:5	PC 18:0 18:0	PC 18:0 18:1	PC 18:1 18:1	PC 18:1 18:2	PC 18:2 18:2	PC 16:0 20:5	PC 16:0 22:0	PC 16:0 22:1	PC 18:1 20:1	PC 18:0 20:3	PC 16:0 22:4	PC 18:0 20:5	PC 16:0 22:6	PC 18:0 22:1	PC 18:1 22:1	PC 18:1 22:2	PC 18:1 22:3	PC 18:0 22:5	PC 18:0 22:6	PC 18:1 22:6	PC 18:2 22:6	PE 16:0 18:0	PE 16:0 18:1	PE 16:0 18:2	PE 16:0 18:3	PE 16:0 16:0	PE 16:0 16:1	PE 16:0 20:0	PE 16:0 20:1	PE 16:0 20:2	PE 16:0 20:3	PE 16:0 20:4	PE 16:0 20:5	PE 16:0 22:0	PE 16:0 22:1	PE 16:0 22:2	PE 16:0 22:3	PE 16:0 22:4
Sample 23	adipo1_scdi_r2_600pa1	1	600µM PA	knockout	3.6594	26.0209	10.0622	0.972016	16.0993	23.6993	0.066713	0.484972	2.85254	7.51055	2.65338	1.51342	0.387177	0.0376825	0.0563257	0.360813	0.739365	1.03204	0.71019	0.215147	0.0385398	0.0435873	0.0909494	0.173493	0.195775	0.163461	0.120595	0.0402002	1.42865	34.1089	5.46585	0.744986	5.97161	31.2973	0.0389285	0.716553	1.74643	7.981	6.42214	0.0903599	0.00502176	0.0506853	0.14293	0.597392	0.778901
Sample 24	adipo1_scdi_r2_600pa2	1	600µM PA	knockout	3.50564	26.8571	9.63447	0.945952	17.6073	23.5526	0.080009	0.506658	2.64946	7.00956	2.45752	1.33998	0.36558	0.0151401	0.0447099	0.300771	0.650973	0.903384	0.641866	0.19285	0.0360147	0.0333961	0.0758115	0.153808	0.169825	0.132032	0.10343	0.03416	1.47592	35.7627	5.31798	0.825213	5.9022	30.0644	0.0342844	0.796208	1.6761	7.77031	6.14206	0.0759603	0.00209829	0.0515807	0.162761	0.660543	0.722512
Sample 47	adipo1_scdi_r2_600pa1	2	600µM PA	knockout	4.24458	26.4356	9.94907	0.895205	17.8344	20.8914	0.0815251	0.546105	3.10919	7.74346	2.58423	1.48169	0.336014	0.0261845	0.0546016	0.389833	0.730374	1.00446	0.707999	0.198738	0.0263424	0.036767	0.0830514	0.155858	0.186092	0.143059	0.104725	0.0194107	1.5325	37.3715	4.76878	0.547284	6.26716	30.1393	0.0365802	0.788687	1.49942	6.88791	6.0299	0.0710326	0.00348146	0.0511633	0.139759	0.537846	0.692429
Sample 48	adipo1_scdi_r2_600pa2	2	600µM PA	knockout	4.12957	25.8796	9.84468	0.900858	17.3883	22.6226	0.0780462	0.517093	2.97442	7.72645	2.53663	1.43947	0.319996	0.0231925	0.0457205	0.357328	0.704613	0.949003	0.663578	0.192046	0.0265436	0.031553	0.0755717	0.149567	0.172736	0.131167	0.101159	0.0185665	1.48679	37.3249	4.88437	0.709418	6.50335	29.0407	0.0369307	0.76889	1.76077	7.13606	6.16513	0.0742794	0.00382787	0.0513015	0.138317	0.618657	0.787774
Sample 19	adipo1_scdi_wt_600pa1	1	600µM PA	wildtype	3.2177	26.8719	10.2132	1.01237	10.5186	30.2786	0.0771459	0.447979	2.60753	6.74685	2.55224	1.52673	0.363733	0.0184292	0.0366686	0.297466	0.661895	0.969556	0.642378	0.209566	0.0344679	0.0390734	0.0829119	0.15245	0.16818	0.132779	0.0913248	0.0282897	1.00071	32.766	5.35476	0.836692	2.47312	38.1332	0.0160572	0.47813	1.30268	7.49959	5.80911	0.0850605	0.00201293	0.0285614	0.151632	0.578668	0.813741
Sample 20	adipo1_scdi_wt_600pa2	1	600µM PA	wildtype	3.19839	26.7184	10.1791	1.04599	10.7768	30.0757	0.0812686	0.497072	2.71569	6.77148	2.57734	1.51896	0.3596	0.0334024	0.00464381	0.305184	0.622594	0.941228	0.634037	0.200456	0.0354118	0.0350056	0.08343	0.153683	0.172019	0.139655	0.0929596	0.0306142	1.07511	32.7484	5.28896	0.805968	2.77634	37.5551	0.0246516	0.483224	1.44885	7.56659	5.83224	0.0915223	0.00109258	0.0263741	0.138147	0.595662	0.837405
Sample 43	adipo1_scdi_wt_600pa1	2	600µM PA	wildtype	3.70693	26.808	10.6387	0.920965	11.4444	26.7847	0.071935	0.51539	3.06422	7.59216	2.66574	1.63083	0.355284	0.0326367	0.0467917	0.361726	0.720911	1.01675	0.694855	0.207887	0.0248709	0.0319343	0.0798347	0.152368	0.178585	0.13882	0.0951994	0.0175556	1.08126	33.6107	4.96457	0.697311	2.69449	38.3471	0.0162046	0.430264	1.40319	7.0986	5.68504	0.0837001	0.00131347	0.0289941	0.118514	0.494142	0.67788
Sample 44	adipo1_scdi_wt_600pa2	2	600µM PA	wildtype	3.70386	26.7613	10.7855	0.936628	11.436	26.3994	0.0703375	0.34126	3.1264	7.81271	2.77316	1.69888	0.362701	0.0282569	0.045581	0.36739	0.717666	1.02682	0.70516	0.207233	0.0218808	0.0287978	0.0783075	0.149536	0.166846	0.138013	0.0942024	0.016069	1.18008	32.8951	5.40223	0.766825	2.82148	36.186	0.0154081	0.508771	1.52827	7.82248	6.15322	0.0940377	0.000862256	0.0283465	0.144268	0.601663	0.889072
Sample 22	adipo1_scdi_wt_600pa_scdi2	1	600µM PA + scd inhibitor	wildtype	3.69696	27.1153	9.78103	1.0605	11.8017	26.0646	0.0623484	0.576161	3.52322	6.9486	3.09521	1.81315	0.371271	0.0430076	0.0542214	0.365366	0.810781	1.06751	0.681416	0.235206	0.0369007	0.0462882	0.0979032	0.16434	0.186828	0.15629	0.106523	0.0373258	1.19237	29.2326	7.38342	1.25444	3.0876	34.4993	0.0188916	0.467119	1.88379	9.40645	6.48138	0.0967866	0.0016284	0.027976	0.154728	0.696045	0.979187
Sample 46	adipo1_scdi_wt_600pa_scdi2	2	600µM PA + scd inhibitor	wildtype	4.13713	27.1522	9.87813	0.965649	12.669	23.6986	0.0708589	0.617732	3.97233	7.48771	3.1193	1.89507	0.347025	0.0259858	0.054159	0.379913	0.803708	1.06919	0.679753	0.234923	0.0261752	0.0306584	0.0869653	0.162647	0.183524	0.141155	0.0924126	0.0181408	1.22286	31.5324	6.97452	1.08406	3.09045	33.2294	0.0261326	0.472983	1.68246	9.07347	6.64049	0.110486	0.00169644	0.0323453	0.127204	0.645295	0.990966
Sample 21	adipo1_scdi_wt_600pa_scdi1	1	600µM PA + scd inhibitor	wildtype	3.55867	27.7671	9.14926	0.981273	12.303	27.7746	0.0928974	0.536836	3.26648	6.27461	2.82007	1.6297	0.350536	0.0350346	0.0463769	0.296117	0.68385	0.92739	0.591035	0.213775	0.0351358	0.0375988	0.0819704	0.145159	0.159343	0.124604	0.0852569	0.0323822	1.17417	29.2005	7.21783	1.25997	2.85219	34.9982	0.0224598	0.467522	1.86969	9.51149	6.46905	0.107956	0.00330426	0.0338827	0.145353	0.618677	0.878461
Sample 45	adipo1_scdi_wt_600pa_scdi1	2	600µM PA + scd inhibitor	wildtype	4.06231	27.0273	9.99353	0.973275	12.4053	23.7605	0.0662811	0.648394	3.91773	7.62541	3.18048	1.92324	0.354409	0.0317045	0.0488114	0.375515	0.813409	1.11572	0.714915	0.225647	0.0246817	0.0318458	0.0795804	0.161065	0.184843	0.148785	0.0919282	0.013397	1.18278	31.1305	7.22603	1.14773	2.9647	33.0302	0.023281	0.456539	1.79103	9.34187	6.75204	0.120681	0.00247908	0.0284777	0.147441	0.609791	1.00192
Sample 17	adipo1_scdi_r2_dmso1	1	dmso	knockout	3.21757	26.6792	11.3383	1.08	11.2114	26.3165	0.0849872	0.51072	2.64075	8.17229	2.66805	1.41197	0.391691	0.0407067	0.048041	0.370901	0.813567	1.1211	0.802779	0.213276	0.0364327	0.0464954	0.104485	0.19163	0.20009	0.168222	0.107501	0.0113198	1.07562	35.8067	4.67732	0.761433	3.46612	33.7979	0.0251962	0.712648	1.57337	7.62937	6.20292	0.0809322	0.00220127	0.0341376	0.137031	0.657682	0.648862
Sample 18	adipo1_scdi_r2_dmso2	1	dmso	knockout	3.22138	27.8393	11.0417	1.04086	11.3155	24.708	0.0889367	0.490194	2.84494	8.55323	2.68495	1.40178	0.391482	0.0361983	0.0500638	0.350831	0.824649	1.12745	0.829887	0.219177	0.0357365	0.0395482	0.105303	0.194771	0.220671	0.16947	0.134904	0.0390776	1.20778	33.861	5.5704	0.787634	3.23816	33.8948	0.0254116	0.69592	1.58007	8.14037	6.6465	0.0771242	0.00170498	0.0344107	0.139992	0.596414	0.80986
Sample 41	adipo1_scdi_r2_dmso1	2	dmso	knockout	3.90056	26.2447	11.4862	0.969313	12.3093	22.5161	0.0883785	0.542589	3.30698	9.3667	2.84284	1.4672	0.375487	0.0400911	0.0506844	0.429065	0.880197	1.21248	0.873805	0.207059	0.0288871	0.0362198	0.0952968	0.18807	0.219736	0.173906	0.126182	0.0219588	1.20662	36.4988	4.95762	0.560601	3.7219	32.4813	0.0293081	0.72472	1.58765	7.52592	6.4427	0.0586171	0.00236237	0.039707	0.125363	0.543635	0.695747
Sample 42	adipo1_scdi_r2_dmso2	2	dmso	knockout	3.8784	26.169	11.413	0.954699	12.3968	22.6455	0.0774352	0.472918	3.29408	9.58899	2.77386	1.4323	0.355781	0.0329585	0.0549023	0.44413	0.869949	1.19971	0.842198	0.214217	0.0248997	0.034956	0.0996127	0.193414	0.22065	0.172232	0.124351	0.0190167	1.31459	38.1789	4.90379	0.524816	3.51469	31.0887	0.0295342	0.724417	1.64767	7.36045	6.26046	0.0687444	0.00392107	0.0470839	0.12814	0.537141	0.686717
Sample 13	adipo1_scdi_wt_dmso1	1	dmso	wildtype	3.20106	26.5279	11.079	1.10689	8.70195	28.8366	0.100224	0.49514	3.01831	8.0335	2.63218	1.46658	0.409921	0.0494522	0.0433563	0.369192	0.804604	1.19715	0.810087	0.227062	0.0373986	0.0434645	0.1008	0.190823	0.222501	0.155712	0.120785	0.0183306	0.968294	31.7168	5.25874	0.760126	2.2605	39.6432	0.0206865	0.495571	1.4251	7.60074	5.68855	0.0624944	0.00257781	0.027471	0.131668	0.534193	0.72106
Sample 14	adipo1_scdi_wt_dmso2	1	dmso	wildtype	3.15279	26.6718	11.7626	1.18741	8.47422	28.0304	0.0839221	0.478784	2.85879	8.28922	2.69762	1.49362	0.416369	0.0503431	0.0490425	0.389768	0.820106	1.19178	0.785446	0.217778	0.0368563	0.0394227	0.0989681	0.184941	0.209901	0.167525	0.122682	0.0378579	0.96024	33.0849	4.50526	0.727129	2.52155	38.6827	0.0193989	0.478287	1.2874	7.60703	5.6869	0.0656874	0.00172651	0.0300591	0.13139	0.600751	0.814394
Sample 37	adipo1_scdi_wt_dmso1	2	dmso	wildtype	3.62622	26.4539	11.939	0.999011	9.46056	25.8152	0.0826606	0.507862	3.13261	8.94419	2.80032	1.5145	0.368427	0.0338166	0.0499895	0.403199	0.818525	1.18202	0.829494	0.218904	0.0240207	0.0314615	0.0888844	0.1825	0.207157	0.160134	0.106694	0.0187194	1.03333	34.8043	5.02291	0.608342	2.34709	36.5845	0.01937	0.460154	1.43643	7.27777	5.899	0.068749	0.000924505	0.0288917	0.133624	0.594383	0.895031
Sample 38	adipo1_scdi_wt_dmso2	2	dmso	wildtype	3.50702	26.3849	11.9261	1.03221	9.23661	25.9021	0.0771259	0.516164	3.1398	9.22693	2.80424	1.51765	0.38653	0.0355768	0.0427191	0.397042	0.843837	1.16929	0.817749	0.198379	0.0229525	0.0300157	0.0919008	0.179249	0.219724	0.167617	0.10745	0.0191222	1.03147	31.6648	5.0157	0.590692	2.41095	39.7811	0.0151394	0.49113	1.29836	7.43069	5.77777	0.0854739	0.00199955	0.0231444	0.129045	0.550183	0.80644
Sample 16	adipo1_scdi_wt_dmso_scdi2	1	dmso + scd inhibitor	wildtype	3.27691	27.0534	11.0269	1.18047	8.91665	27.5161	0.0750622	0.577631	3.27546	7.80287	2.9535	1.67248	0.393582	0.0255057	0.0464894	0.357145	0.808275	1.16481	0.781311	0.227854	0.0377248	0.0344152	0.0933945	0.179264	0.208334	0.169568	0.112134	0.0327178	1.09594	29.2546	7.00984	1.26438	2.25983	36.5759	0.020003	0.425031	1.56454	9.18867	6.33053	0.109429	0.0027493	0.0243433	0.139915	0.618327	0.94511
Sample 40	adipo1_scdi_wt_dmso_scdi2	2	dmso + scd inhibitor	wildtype	3.88858	27.0894	11.414	1.06777	9.59149	23.3806	0.079403	0.643428	3.82773	9.0981	3.18282	1.76845	0.373388	0.0312609	0.0615415	0.428491	0.91	1.24504	0.82268	0.234274	0.024739	0.0357244	0.0941676	0.19407	0.216445	0.17026	0.107377	0.0188116	1.07708	31.6428	5.71103	1.03403	2.47121	34.8054	0.0236672	0.422937	1.79465	9.07363	6.61708	0.0983834	0.000702477	0.0269909	0.134802	0.651374	0.99898
Sample 15	adipo1_scdi_wt_dmso_scdi1	1	dmso + scd inhibitor	wildtype	3.40011	27.9231	10.4809	1.13204	9.09805	26.7736	0.107428	0.597475	3.37159	7.69827	2.99077	1.68024	0.394882	0.0463029	0.0548567	0.397227	0.8547	1.13598	0.754358	0.227416	0.038038	0.0402168	0.0991373	0.179906	0.211334	0.16275	0.1104	0.0389273	1.09639	28.9585	6.9648	1.11068	2.54085	36.9884	0.0202224	0.457299	1.59372	9.14556	6.24737	0.0847056	0.00220267	0.0311385	0.139299	0.602216	0.901045
Sample 39	adipo1_scdi_wt_dmso_scdi1	2	dmso + scd inhibitor	wildtype	3.78436	26.5377	10.9984	1.04295	9.41583	25.079	0.0724734	0.619583	3.76658	8.90642	3.15148	1.75085	0.369469	0.0330286	0.0468178	0.412482	0.892188	1.2422	0.810991	0.225498	0.0237711	0.0318616	0.0927757	0.187072	0.214971	0.166588	0.107213	0.0174302	1.08171	32.0979	6.46137	1.06217	2.48004	33.8767	0.0219068	0.428483	1.68458	9.11338	6.59964	0.100228	0.0018975	0.0301325	0.115955	0.601245	0.991219
[truncated: 10 more columns]

[truncated: 1 more sheets: Appendix B Table 1J]
